# Supplementary material
Source: PubMed Central journal article supplement (PMC4111400)

## SUPPORTING INFORMATION

### **Substituted *N*-(Biphenyl-4'-yl)methyl (*R*)-2-Acetamido-3-methoxypropionamides: Potent Anticonvulsants That Affect Frequency (Use)-Dependence and Slow Inactivation of Sodium Channels**

Hyosung Lee,<sup>1,a,b</sup> Ki Duk Park,<sup>1,a,c</sup> Robert Torregrosa,<sup>2</sup> Xiao-Fang Yang,<sup>4</sup> Erik T. Dustrude,<sup>5</sup> Yuying Wang,<sup>6,d</sup> Sarah M. Wilson,<sup>5</sup> Cindy Barbosa,<sup>5,6</sup> Yucheng Xiao,<sup>5,6</sup> Theodore R. Cummins,<sup>5,6</sup> Rajesh Khanna<sup>4,\*</sup> and Harold Kohn<sup>1,3,\*</sup>

From the <sup>1</sup>Division of Chemical Biology and Medicinal Chemistry, UNC Eshelman School of Pharmacy and the <sup>3</sup>Department of Chemistry, University of North Carolina, Chapel Hill, NC 27599, United States

<sup>2</sup>NeuroGate Therapeutics, Inc., 150 Fayetteville Street, Suite 2300, Raleigh, NC 27601

<sup>4</sup>Department of Pharmacology, College of Medicine, University of Arizona, Tucson, Arizona 85742, United States

<sup>5</sup>Program in Medical Neuroscience, Paul and Carole Stark Neurosciences Research Institute and

<sup>6</sup>Department of Pharmacology and Toxicology, Indiana University School of Medicine, Indianapolis, IN 46202

\*Corresponding authors

## TABLE of CONTENTS

|                                                                                      |     |
|--------------------------------------------------------------------------------------|-----|
| Listing                                                                              | 2-3 |
| Supporting figure legends                                                            | 4-6 |
| Supporting Information, Figure S1                                                    | 7   |
| Supporting Information, Figure S2                                                    | 8   |
| Supporting Information, Figure S3                                                    | 9   |
| Supporting Information, Figure S4                                                    | 10  |
| Supporting Information, Figure S5                                                    | 11  |
| Table S1. Elemental Analyses for New Compounds                                       | 12  |
| Table S2. High Resolution Mass Spectrometry (ESI <sup>+</sup> )                      | 13  |
| Scheme 1. Preparation of (Biphenyl-4-yl)methylamines <b>29-39</b>                    | 14  |
| Scheme 2. Preparation of (Biphenyl-4-yl)methylamines <b>43</b> and <b>44</b>         | 14  |
| Scheme 3. Synthesis of Compounds ( <i>R</i> )- <b>4</b> – ( <i>R</i> )- <b>13</b>    | 15  |
| Scheme 4. Synthesis of ( <i>R</i> )- <b>69</b> and ( <i>R</i> )- <b>70</b>           | 15  |
| Scheme 5. Syntheses of Compounds ( <i>R</i> )- <b>14</b> and ( <i>R</i> )- <b>15</b> | 16  |
| Scheme 6. Syntheses of Compound ( <i>R</i> )- <b>16</b>                              | 16  |

|                                                      |       |
|------------------------------------------------------|-------|
| Experimental Section                                 | 17-49 |
| References                                           | 49-50 |
| <sup>1</sup> H and <sup>13</sup> C NMR spectral data | 51-63 |

## SUPPORTING FIGURE LEGENDS

**Supporting Figure S1. Effects of (*R*)-A compounds with a polar, aprotic substituent at the 4''-position on steady-state slow inactivation state of Na<sup>+</sup> currents in CAD cells. A.** Voltage protocol for slow inactivation. Currents were evoked by 5 s prepulses between –120 mV and –20 mV and then fast-inactivated channels were allowed to recover for 150 ms at a hyperpolarized pulse to –120 mV. The fraction of channels available at 0 mV was analyzed. **B-D.** Summary of steady-state slow activation curves for CAD cells treated with DMSO (control) or various concentrations of the indicated compounds. **E.** Concentration versus  $V_{1/2}$  response curve for effects on slow inactivation. To estimate the half-maximal value for induction of slow inactivation, dose-response curves were fit using the equation:  $Y = A_1 + (A_2 - A_1) / (1 + 10^{((\text{LOG}x_0 - x) * p)})$ , where  $Y$  is the measured response of the  $I_{\text{Na}}$ ,  $A_2$  and  $A_1$  are the maximum and the minimum responses respectively of the  $I_{\text{Na}}$  obtained with a control sample,  $p$  is the slope parameter of the dose-response curve,  $x$  is the applied dose, and  $\text{log}X_0$  is the center of the curve that is the concentration for half the  $I_{\text{Na}}$  response. The curves were well fitted with this dose-response function ( $R^2 > 0.989$ ). Each point is the mean  $\pm$  SEM of 4–6 CAD cell recordings. The half-maximal values for slow inactivation for the indicated compounds are shown in the inset to the figure.

**Supporting Figure S2. Effects of (*R*)-A compounds with a polar, aprotic substituent at the 4''-position on fast inactivation and steady-state activation states of Na<sup>+</sup> currents in CAD cells. A.**

Voltage protocol for fast inactivation (*left*) and activation (*right*). **B.-D.** Representative Boltzmann fits for steady-state fast inactivation and activation for CAD cells treated with 0.1% DMSO (control) and 10  $\mu$ M of the indicated compounds are shown. The  $V_{1/2}$  and  $k$  of steady-state fast inactivation or activation were not different among any of the conditions tested ( $p > 0.05$ , one-way ANOVA). Data are from 3-6 cells per condition.

**Supporting Figure S3. Effect on frequency (use)-dependent block by (R)-A compounds with a polar, aprotic substituent at the 4''-position on Na<sup>+</sup> currents in CAD cells.** **A.** Summary of average frequency-dependent decrease in current amplitude over time ( $\pm$  SEM) produced by control (0.1% DMSO) or by the presence of 1  $\mu$ M (R)-4, (R)-6, and (R)-12. **B.** Summary of the maximal decrement in current amplitude observed at the end of the 30-pulse train for control, or 1  $\mu$ M (R)-4, (R)-6, and (R)-12. (R)-4 and (R)-6 caused a significant decrease in current amplitude compared with control (\*,  $p < 0.05$ , one-way ANOVA with Dunnett's post-hoc test). Data are from 4–6 cells per condition.

**Supporting Figure S4. Effects of (R)-A compounds with a polar, protic substituent at the 3''-position on steady-state slow inactivation state of Na<sup>+</sup> currents in embryonic cortical neurons.** **A.** Voltage protocol for slow inactivation. Representative current traces from cortical neurons in the absence (control, 0.1% DMSO) or presence of 10  $\mu$ M (R)-15. The black and colored traces represent the currents evoked at  $-100$  and  $-50$  mV, respectively (also highlighted in the voltage protocol as a dashed thick line). **B.-D.** Summary of steady-state slow activation curves for neurons treated with DMSO (control) or 10  $\mu$ M (R)-13, (R)-15, or (R)-16. Significant drug-induced slow inactivation was evident at voltages more depolarizing than  $-80$  mV in neurons

treated with (*R*)-**15**. **E.** Summary of the fraction of current available at  $-50$  mV for neurons treated with DMSO (control) or  $10\ \mu\text{M}$  (*R*)-**13**, (*R*)-**15**, or (*R*)-**16**. Asterisk (\*) indicates statistically significant difference in fraction of current available between control and (*R*)-**15** ( $p < 0.05$ , Student's *t*-test). Data are from 5 cells per condition.

**Supporting Figure S5. Effect on frequency (use)-dependent block by (*R*)-A compounds with a polar, aprotic or a polar, protic substituent at the 3''-position on  $\text{Na}^+$  currents in cortical neurons.** Frequency (use)-dependence of block was examined by holding cells at the hyperpolarized potential of  $-70$  mV and evoking currents at 10 Hz by 20-ms test pulses to  $-10$  mV. **A.-B.** Summary of the maximal decrement in current amplitude observed at the end of the 30-pulse train for control, or the indicated compounds. None of the compounds tested caused a significant decrease in current amplitude compared with control ( $p > 0.05$ , one-way ANOVA with Dunnett's post-hoc test). Data are from 3–6 cells per condition.

Supporting Information, Figure S1

**A**

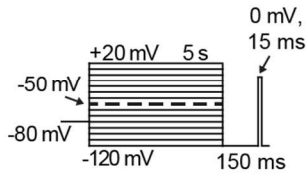

**B**

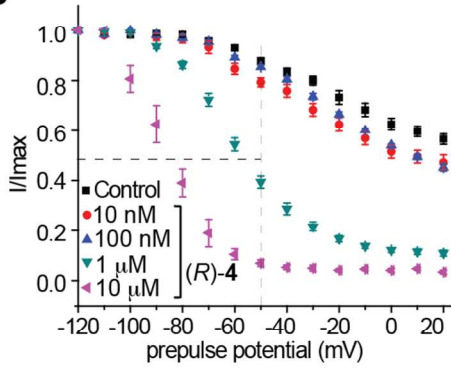

**C**

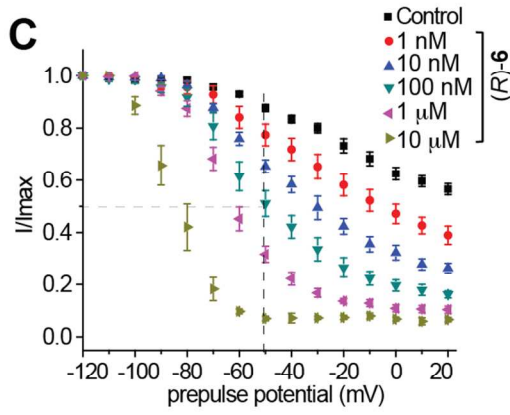

**D**

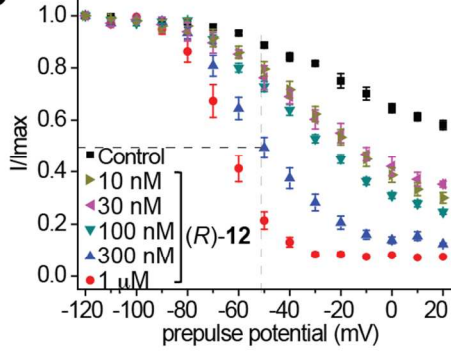

**E**

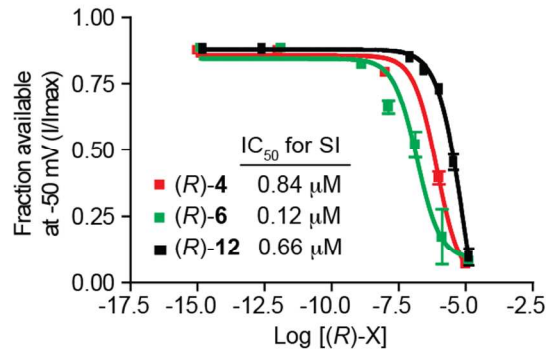

## Supporting Information, Figure S2

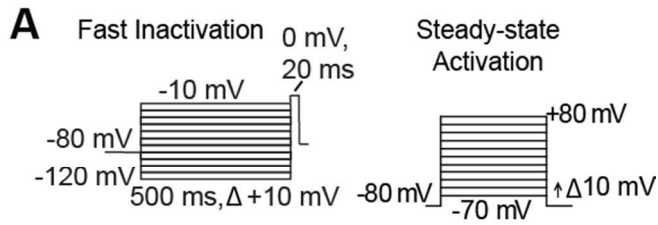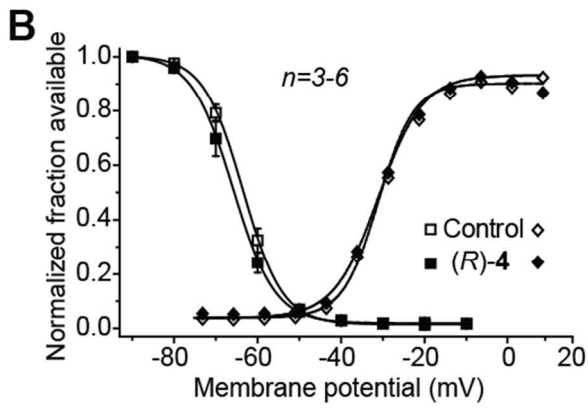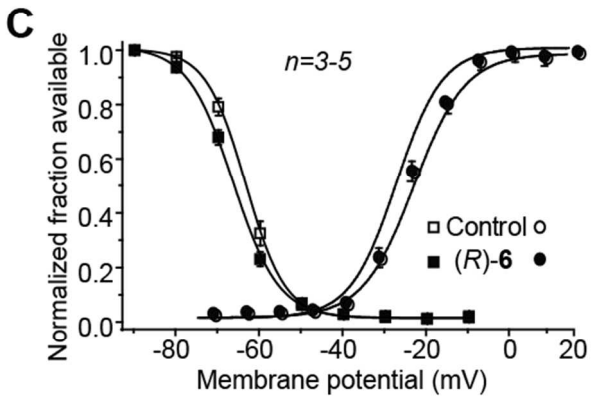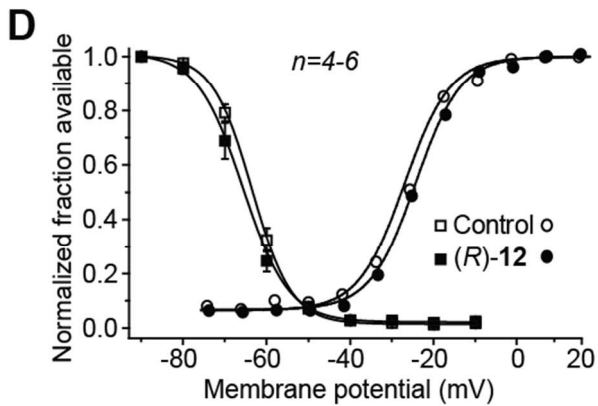



Supporting Information, Figure S3

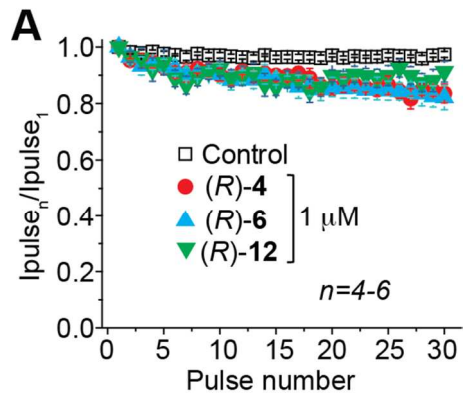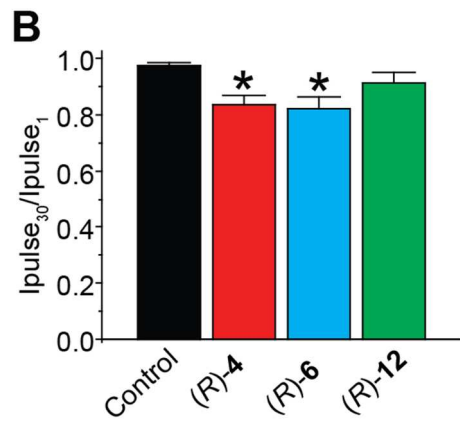

Supporting Information, Figure S4

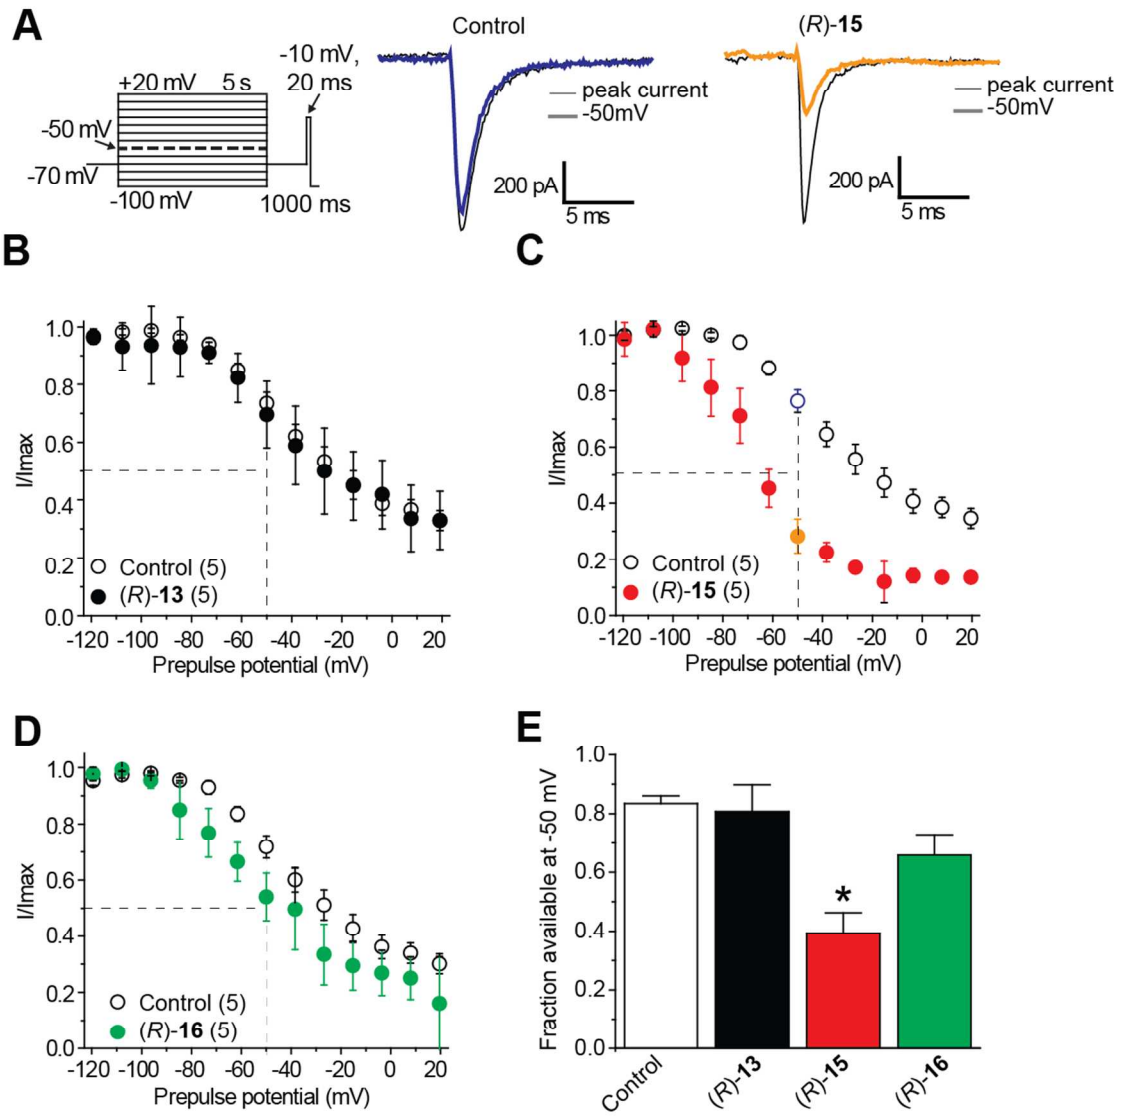

Supporting Information, Figure S5

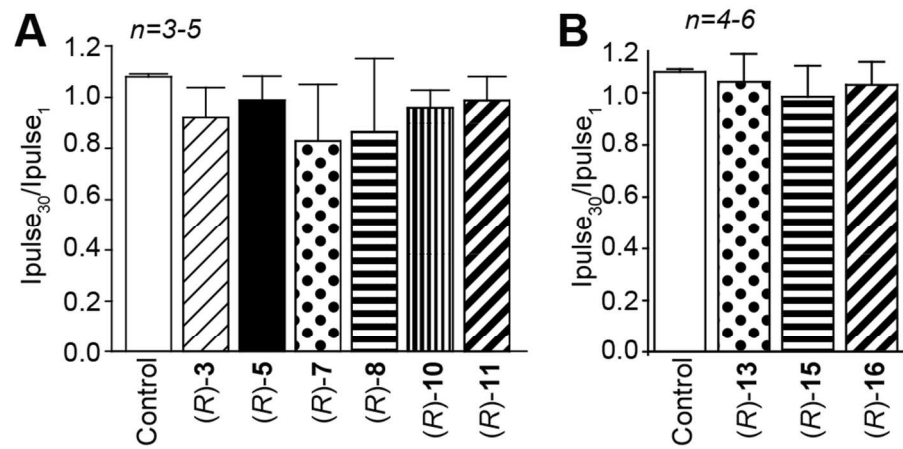

**Table S1.** Elemental Analyses for New Compounds

| <b>Cmpd</b> | <b>Molecular Formula</b>                                                     | <b>Calculated (%)</b>                 | <b>Found (%)</b>                      |
|-------------|------------------------------------------------------------------------------|---------------------------------------|---------------------------------------|
| (R)-4       | C <sub>19</sub> H <sub>21</sub> FN <sub>2</sub> O <sub>3</sub>               | C, 66.26; H, 6.15; N, 8.13; F, 5.52   | C, 65.97; H, 6.18; N, 8.11; F, 5.35   |
| (R)-5       | C <sub>19</sub> H <sub>21</sub> ClN <sub>2</sub> O <sub>3</sub>              | C, 63.24; H, 5.87; N, 7.76; Cl, 9.83  | C, 63.29; H, 6.01; N, 7.77; Cl, 9.71  |
| (R)-6       | C <sub>19</sub> H <sub>21</sub> ClN <sub>2</sub> O <sub>3</sub>              | C, 63.24; H, 5.87; N, 7.76; Cl, 9.83  | C, 63.00; H, 6.02; N, 7.69; Cl, 9.58  |
| (R)-7       | C <sub>19</sub> H <sub>21</sub> BrN <sub>2</sub> O <sub>3</sub>              | C, 56.31; H, 5.22; N, 6.91; Br, 19.72 | C, 56.58; H, 5.14; N, 6.90; Br, 19.45 |
| (R)-8       | C <sub>19</sub> H <sub>21</sub> IN <sub>2</sub> O <sub>3</sub>               | C, 50.46; H, 4.68; N, 6.19; I, 28.06  | C, 50.42; H, 4.64; N, 6.19; I, 27.76  |
| (R)-9       | C <sub>20</sub> H <sub>21</sub> N <sub>3</sub> O <sub>3</sub>                | C, 68.36; H, 6.02; N, 11.96           | C, 68.06; H, 6.04; N, 11.76           |
| (R)-10      | C <sub>20</sub> H <sub>21</sub> F <sub>3</sub> N <sub>2</sub> O <sub>3</sub> | C, 60.91; H, 5.37; N, 7.10; F, 14.45  | C, 61.02; H, 5.33; N, 7.17; F, 14.41  |
| (R)-11      | C <sub>20</sub> H <sub>21</sub> F <sub>3</sub> N <sub>2</sub> O <sub>4</sub> | C, 58.53; H, 5.16; N, 6.83; F, 13.89  | C, 58.56; H, 5.28; N, 6.80; F, 13.81  |
| (R)-12      | C <sub>20</sub> H <sub>21</sub> F <sub>3</sub> N <sub>2</sub> O <sub>4</sub> | C, 58.53; H, 5.16; N, 6.83; F, 13.89  | C, 58.50; H, 5.27; N, 6.82; F, 13.91  |
| (R)-14      | C <sub>20</sub> H <sub>24</sub> N <sub>2</sub> O <sub>4</sub>                | C, 67.40; H, 6.79; N, 7.86            | C, 67.32; H, 6.98; N, 7.74            |
| (R)-15      | C <sub>20</sub> H <sub>22</sub> N <sub>2</sub> O <sub>5</sub>                | C, 64.45; H, 6.02; N, 7.52            | C, 64.06; H, 6.09; N, 7.35            |
| (R)-46      | C <sub>21</sub> H <sub>25</sub> FN <sub>2</sub> O <sub>4</sub>               | C, 64.93; H, 6.49; N, 7.21; F, 4.89   | C, 64.71; H, 6.53; N, 7.22; F, 4.92   |
| (R)-47      | C <sub>21</sub> H <sub>25</sub> ClN <sub>2</sub> O <sub>4</sub>              | C, 62.30; H, 6.22; N, 6.92; Cl, 8.76  | C, 62.16; H, 6.32; N, 6.99; Cl, 8.61  |
| (R)-48      | C <sub>21</sub> H <sub>25</sub> ClN <sub>2</sub> O <sub>4</sub>              | C, 62.30; H, 6.22; N, 6.92; Cl, 8.76  | C, 62.03; H, 6.30; N, 6.84; Cl, 8.55  |
| (R)-53      | C <sub>22</sub> H <sub>25</sub> F <sub>3</sub> N <sub>2</sub> O <sub>5</sub> | C, 58.15; H, 5.54; N, 6.16; F, 12.54  | C, 57.99; H, 5.68; N, 6.11; F, 12.40  |
| (R)-54      | C <sub>22</sub> H <sub>25</sub> F <sub>3</sub> N <sub>2</sub> O <sub>5</sub> | C, 58.15; H, 5.54; N, 6.16; F, 12.54  | C, 58.09; H, 5.67; N, 6.25; F, 12.40  |
| (R)-56      | C <sub>22</sub> H <sub>27</sub> FN <sub>2</sub> O <sub>4</sub>               | C, 65.66; H, 6.67; N, 6.96; F, 4.72   | C, 65.58; H, 6.65; N, 6.84; F, 4.53   |
| (R)-57      | C <sub>22</sub> H <sub>27</sub> ClN <sub>2</sub> O <sub>4</sub>              | C, 63.08; H, 6.50; N, 6.69; Cl, 8.46  | C, 62.94; H, 6.67; N, 6.65; Cl, 8.24  |
| (R)-58      | C <sub>22</sub> H <sub>27</sub> ClN <sub>2</sub> O <sub>4</sub>              | C, 63.08; H, 6.50; N, 6.69; Cl, 8.46  | C, 62.88; H, 6.52; N, 6.68; Cl, 8.17  |
| (R)-63      | C <sub>23</sub> H <sub>27</sub> F <sub>3</sub> N <sub>2</sub> O <sub>5</sub> | C, 58.97; H, 5.81; N, 5.98; F, 12.17  | C, 59.05; H, 5.97; N, 5.92; F, 12.06  |
| (R)-64      | C <sub>23</sub> H <sub>27</sub> F <sub>3</sub> N <sub>2</sub> O <sub>5</sub> | C, 58.97; H, 5.81; N, 5.98; F, 12.17  | C, 58.92; H, 5.93; N, 5.95; F, 11.98  |
| (R)-68      | C <sub>13</sub> H <sub>17</sub> NO <sub>4</sub>                              | C, 62.14; H, 6.82; N, 5.57            | C, 62.27; H, 6.72; N, 5.77            |
| (R)-72      | C <sub>23</sub> H <sub>28</sub> N <sub>2</sub> O <sub>5</sub>                | C, 66.97; H, 6.84; N, 6.79; O, 19.39  | C, 67.59; H, 7.09; N, 6.57; O, 18.76  |

**Table S2.** High Resolution Mass Spectrometry (ESI<sup>+</sup>)

| <b>Cmpd</b> | <b>Molecular Formula</b>                                                     | <b>Found</b>                         | <b>Calculated</b> |
|-------------|------------------------------------------------------------------------------|--------------------------------------|-------------------|
| (R)-7       | C <sub>19</sub> H <sub>21</sub> BrN <sub>2</sub> O <sub>3</sub>              | 405.0814 [M + H] <sup>+</sup>        | 405.0814          |
| (R)-8       | C <sub>19</sub> H <sub>21</sub> IN <sub>2</sub> O <sub>3</sub>               | 453.0675 [M + H] <sup>+</sup>        | 453.0673          |
| (R)-9       | C <sub>20</sub> H <sub>21</sub> N <sub>3</sub> O <sub>3</sub>                | 352.1660 [M + H] <sup>+</sup>        | 352.1661          |
| (R)-10      | C <sub>20</sub> H <sub>21</sub> F <sub>3</sub> N <sub>2</sub> O <sub>3</sub> | 395.1582 [M + H] <sup>+</sup>        | 395.1583          |
| (R)-13      | C <sub>21</sub> H <sub>25</sub> N <sub>3</sub> O <sub>3</sub>                | 384.1924 [M + H] <sup>+</sup>        | 384.1923          |
| (R)-15      | C <sub>20</sub> H <sub>22</sub> N <sub>2</sub> O <sub>5</sub>                | 371.1607 [M + H] <sup>+</sup>        | 371.1607          |
| (R)-16      | C <sub>19</sub> H <sub>24</sub> N <sub>3</sub> ClO <sub>3</sub>              | 342.1817 [M – Cl] <sup>+</sup>       | 342.1817          |
| 29·HCl      | C <sub>13</sub> H <sub>13</sub> ClFN                                         | 202.1022 [M – Cl] <sup>+</sup>       | 202.1032          |
| 34·HCl      | C <sub>14</sub> H <sub>13</sub> ClF <sub>3</sub> NO                          | 268.0951 [M – Cl] <sup>+</sup>       | 268.0949          |
| 35·HCl      | C <sub>14</sub> H <sub>13</sub> ClF <sub>3</sub> NO                          | 268.0949 [M – Cl] <sup>+</sup>       | 268.0949          |
| 36          | C <sub>15</sub> H <sub>16</sub> N <sub>2</sub> O                             | 279.0937 [M + K] <sup>+</sup>        | 279.0900          |
| 37·HCl      | C <sub>18</sub> H <sub>24</sub> ClNO                                         | 292.1677 [M + Na] <sup>+</sup>       | 292.1677          |
| 39·HCl      | C <sub>18</sub> H <sub>23</sub> ClN <sub>2</sub> O <sub>2</sub>              | 321.1630 [M – HCl + Na] <sup>+</sup> | 321.1620          |
| 44·HCl      | C <sub>13</sub> H <sub>13</sub> ClN                                          | 310.0093 [M – Cl] <sup>+</sup>       | 310.0111          |
| (R)-49      | C <sub>21</sub> H <sub>25</sub> BrN <sub>2</sub> O <sub>4</sub>              | 449.1076 [M + H] <sup>+</sup>        | 449.1074          |
| (R)-50      | C <sub>21</sub> H <sub>25</sub> IN <sub>2</sub> O <sub>4</sub>               | 497.0937 [M + H] <sup>+</sup>        | 497.0935          |
| (R)-51      | C <sub>23</sub> H <sub>27</sub> N <sub>3</sub> O <sub>4</sub>                | 396.1924 [M + H] <sup>+</sup>        | 396.1923          |
| (R)-52      | C <sub>22</sub> H <sub>25</sub> F <sub>3</sub> N <sub>2</sub> O <sub>4</sub> | 439.1874 [M + H] <sup>+</sup>        | 439.1844          |
| (R)-55      | C <sub>23</sub> H <sub>29</sub> N <sub>3</sub> O <sub>5</sub>                | 450.2007 [M + Na] <sup>+</sup>       | 450.2005          |
| (R)-59      | C <sub>22</sub> H <sub>27</sub> BrN <sub>2</sub> O <sub>4</sub>              | 463.1232 [M + H] <sup>+</sup>        | 463.1234          |
| (R)-60      | C <sub>22</sub> H <sub>27</sub> IN <sub>2</sub> O <sub>4</sub>               | 511.1094 [M + H] <sup>+</sup>        | 511.1097          |
| (R)-61      | C <sub>23</sub> H <sub>27</sub> N <sub>3</sub> O <sub>4</sub>                | 410.2084 [M + H] <sup>+</sup>        | 410.2080          |
| (R)-62      | C <sub>23</sub> H <sub>27</sub> F <sub>3</sub> N <sub>2</sub> O <sub>4</sub> | 453.2033 [M + H] <sup>+</sup>        | 453.2001          |
| (R)-65      | C <sub>24</sub> H <sub>31</sub> N <sub>3</sub> O <sub>5</sub>                | 442.2345 [M + H] <sup>+</sup>        | 442.2342          |
| (R)-67      | C <sub>12</sub> H <sub>15</sub> NO <sub>4</sub>                              | 238.1078 [M + H] <sup>+</sup>        | 238.1079          |
| (R)-71      | C <sub>23</sub> H <sub>30</sub> N <sub>2</sub> O <sub>4</sub>                | 399.2285 [M + H] <sup>+</sup>        | 399.2284          |
| (R)-72      | C <sub>23</sub> H <sub>28</sub> N <sub>2</sub> O <sub>5</sub>                | 413.2079 [M + H] <sup>+</sup>        | 413.2076          |
| (R)-73      | C <sub>24</sub> H <sub>32</sub> N <sub>2</sub> O <sub>4</sub>                | 413.2442 [M + H] <sup>+</sup>        | 413.2440          |
| (R)-74      | C <sub>24</sub> H <sub>30</sub> N <sub>2</sub> O <sub>5</sub>                | 427.2237 [M + H] <sup>+</sup>        | 427.2233          |
| (R)-75      | C <sub>23</sub> H <sub>31</sub> N <sub>3</sub> O <sub>3</sub>                | 574.1320 [M + Cs] <sup>+</sup>       | 574.1318          |

**Scheme 1. Preparation of (Biphenyl-4-yl)methylamines 29 - 39**

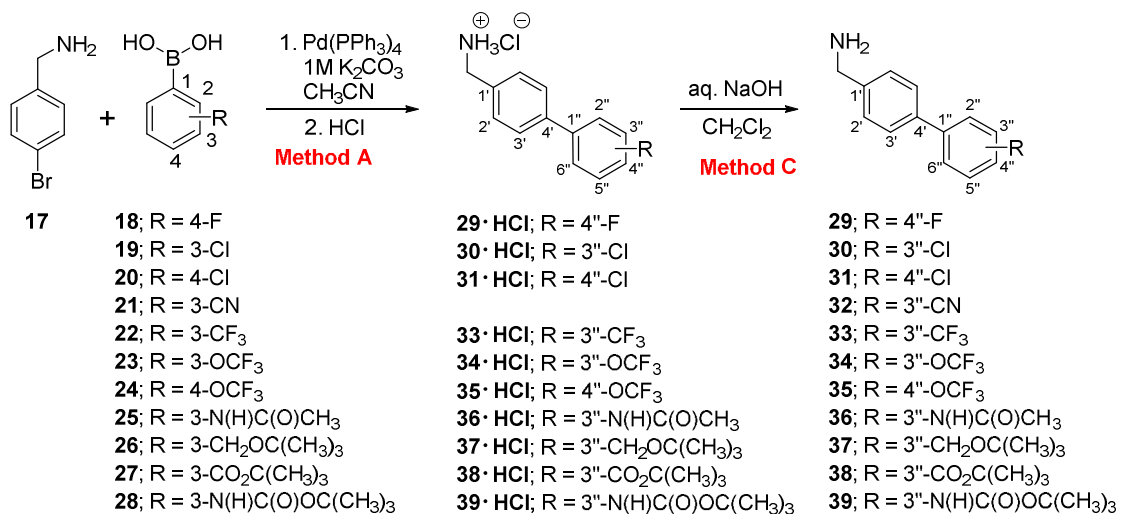

**Scheme 2. Preparation of (Biphenyl-4-yl)methylamines 43 and 44**

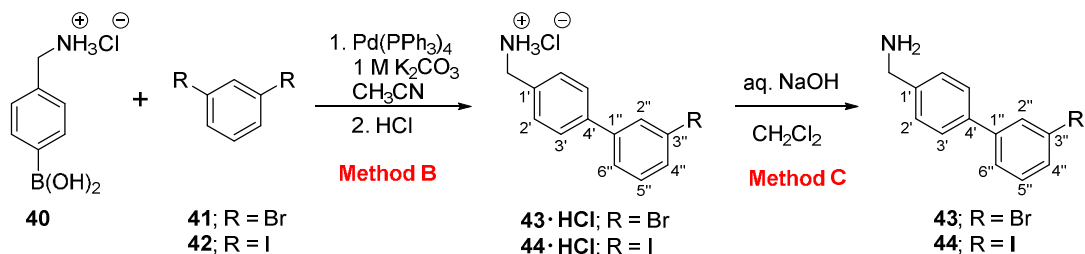

**Scheme 3. Synthesis of Compounds (R)-4 - (R)-13**

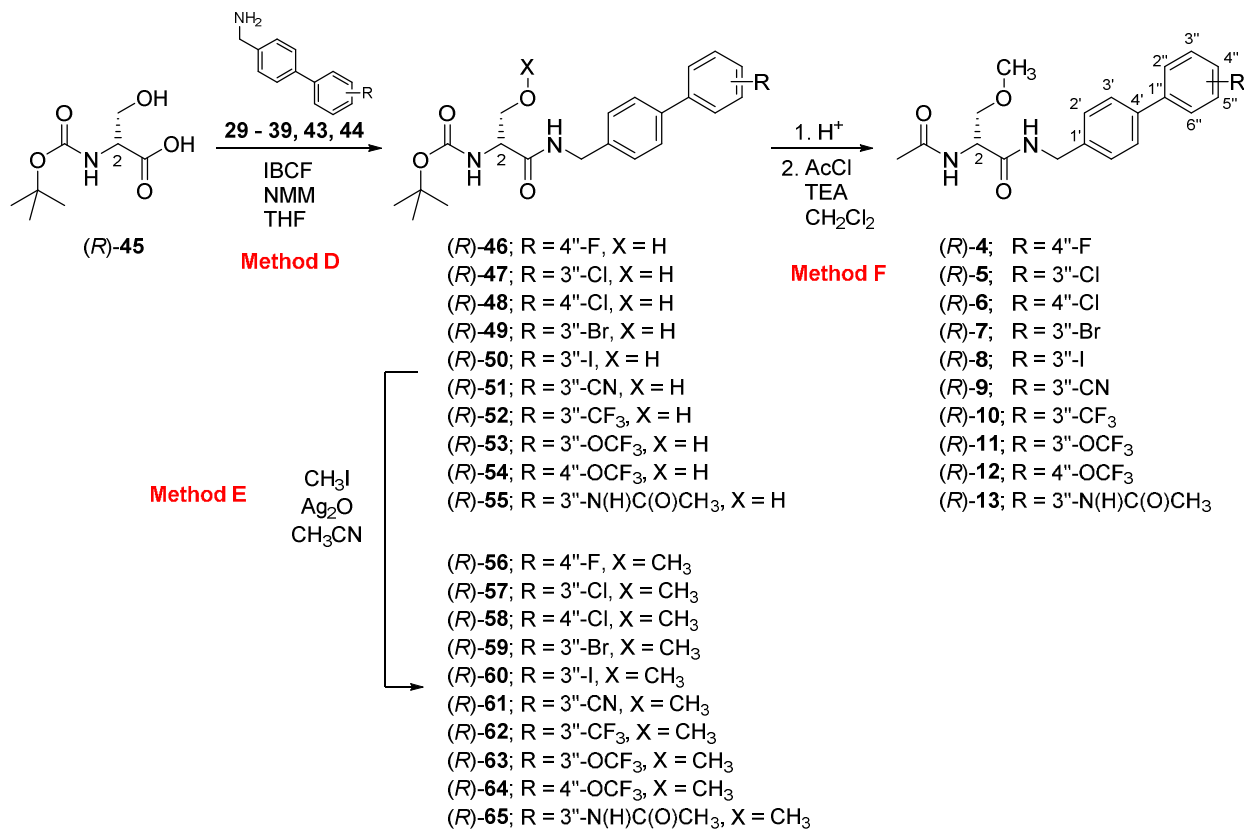

**Scheme 4. Synthesis of (R)-69 and (R)-70**

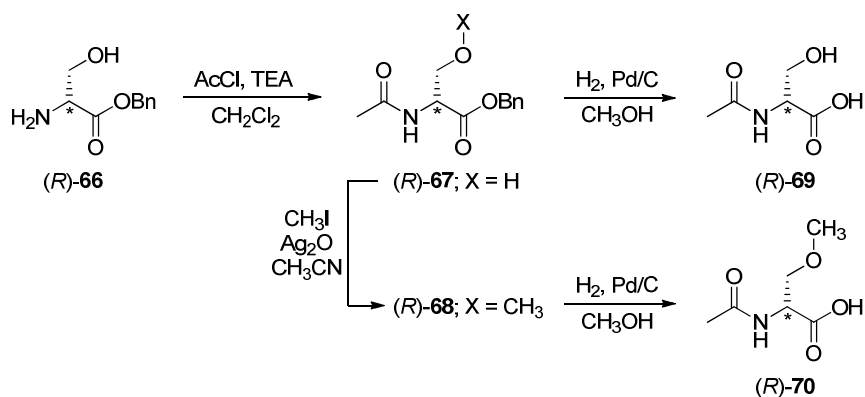

**Scheme 5. Synthesis of Compounds (R)-14 and (R)-15**

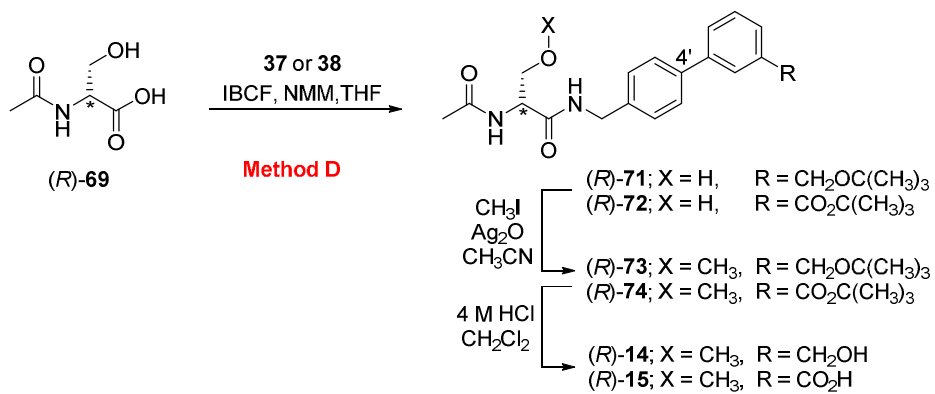

**Scheme 6. Synthesis of Compound (R)-16**

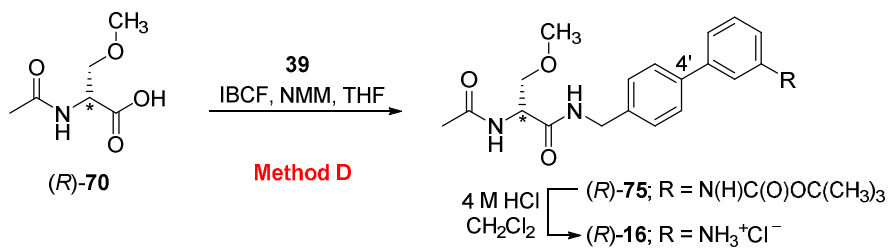



## EXPERIMENTAL SECTION

**General Methods.** Melting points were determined in open capillary tubes using a Thomas-Hoover melting point apparatus and are uncorrected. Infrared spectra (IR) were run on an ATI Mattson Genesis FT-IR spectrometer. Absorption values are expressed in wavenumbers ( $\text{cm}^{-1}$ ). Optical rotations were obtained on a Jasco P-1030 polarimeter at the sodium D line (589 nm) using a 1 dm path length cell. NMR spectra were obtained at 400 MHz ( $^1\text{H}$ ) and 100 MHz ( $^{13}\text{C}$ ) using TMS as an internal standard. Chemical shifts ( $\delta$ ) are reported in parts per million (ppm) from tetramethylsilane. Low-resolution mass spectra were obtained with a BioToF-II-Bruker Daltonics spectrometer by Dr. S. Habibi at the University of North Carolina Department of Chemistry. The high-resolution mass spectrum was performed on a Bruker Apex-Q 12 Telsa FTICR spectrometer by Dr. S. Habibi. Elemental analyses were performed by Atlantic Microlab, Inc. (Norcross, GA). Reactions were monitored using thin-layer chromatography (TLC) plates (Aldrich, Cat # Z12272-6) and analyzed with 254 nm light and visualized with  $\text{KMnO}_4$ , Hanessian and ninhydrin stains. The reactions were purified by flash column chromatography using silica gel (Dynamic Adsorbents Inc., Cat # 02826-25). All chemicals and solvents were reagent grade and used as obtained from commercial sources without further purification. Yields reported are for purified products and were not optimized. Compounds were checked by TLC,  $^1\text{H}$  and  $^{13}\text{C}$  NMR, MS, and elemental analyses. The analytical results are within  $\pm 0.40\%$  of the theoretical value. The TLC, NMR and the analytical data confirmed the purity of the products was  $\geq 95\%$ .

**General Procedure for the Preparation of (Biphenyl-4-yl)methylamine and (Biphenyl-4-yl)methylamine Hydrochloride Derivatives 29 – 39 (Method A).** To a dry  $\text{CH}_3\text{CN}$  solution (60 mL) of 4-bromobenzylamine (5.00 g, 26.9 mmol) was added the desired arylboronic acid (1-1.1

equiv). Then, a solution of 1 M  $K_2CO_3$  (2.0 – 2.50 equiv) was added and the mixture was stirred and heated at reflux under Ar. After 15 min, tetrakis(triphenylphosphine)palladium(0) ( $Pd(PPh_3)_4$ ) (0.04 equiv) was added and stirred at reflux (12–16 h). The mixture was filtered and evaporated in vacuo. The resulting residue was dissolved in EtOAc (200 mL) and washed with  $H_2O$  (1× 200 mL) and brine (1× 200 mL). In the case of **32**, the organic layer was dried ( $Na_2SO_4$ ) and the solvent removed in vacuo to provide the crude free amine. In the case of **29 – 31** and **33 – 39**, either 4 M HCl in dioxane (2 equiv) or aqueous concentrated HCl was added dropwise to the organic layer and stirred at room temperature (1 h), and the precipitate filtered and washed with hexanes to obtain the crude amine hydrochloride salt as a yellow solid.

#### **General Procedure for the Preparation of (Biphenyl-4-yl)methylamine Hydrochloride**

**Derivatives 43 and 44 (Method B).** Employing a procedure similar to Method A, and using *p*-aminomethylboronic acid (1.0 equiv), the 1,3-dihalobenzene (1.1 equiv), aqueous 1 M  $K_2CO_3$  and  $Pd(PPh_3)_4$  (0.05 equiv) in EtOH. For **43** and **44**, aqueous concentrated HCl was added to the organic layer and stirred at room temperature (1 h), and then the solvent was decanted from the pasty solid, washed, and then dried in vacuum to give the crude HCl salt as a yellow-orange solid.

#### **General Procedure for the Preparation of Free (Biphenyl-4-yl)methylamine Derivatives 29 –**

**39, 43, and 44 (Method C).** To a NaOH solution (pH 10, 200 mL) was added the 4-biphenylmethylamine hydrochloride derivative (2–5 g) and then the aqueous layer extracted with  $CH_2Cl_2$  (3× 200 mL). The organic layers were combined, dried ( $Na_2SO_4$ ), and concentrated in vacuo. The resulting residue was used without further purification.

**General Procedure for the Mixed Anhydride Coupling Reaction (Method D).** To a cooled THF or THF·DMSO (10:1) solution (−78 °C, dry ice acetone bath) of either (*R*)-*t*-Boc-D-serine ((*R*)-**45**) or (*R*)-2-acetamido-3-hydroxypropionic acid ((*R*)-**69**) or (*R*)-2-acetamido-3-methoxypropionic acid ((*R*)-**70**) ([C] ~ 0.1 – 0.8 M) were successively added *N*-methylmorpholine (NMM) (1.0–2.6 equiv), stirred for 2 min, isobutylchloroformate (IBCF) (0.8–1.3 equiv), stirred for 5 min, and then the desired benzylamine (0.7 –1.2 equiv). Upon addition the reaction mixture was allowed to warm to room temperature and further stirred (2–3 h). The salts were filtered through Celite® and rinsed with THF and the filtrate was concentrated in vacuo. The residue obtained was purified by column chromatography on SiO<sub>2</sub>.

**General Procedure for the Preparation of 2-*N*-(*tert*-Butoxycarbonyl)amino-3-methoxypropionamide Derivatives (Method E).** To a CH<sub>3</sub>CN or CH<sub>3</sub>CN ·DMF (10:1 – 20:1) solution of the (*R*)-*N*-(biphenyl-4-yl)methyl 2-*N*-(*tert*-butoxycarbonyl)amino-3-hydroxypropionamide derivative ([C] ~0.05–0.5 M) was successively added Ag<sub>2</sub>O (5 equiv) and MeI (10 equiv) at room temperature. The reaction mixture was maintained at room temperature (2–3 d) and filtered through Celite, and the solvent was evaporated in vacuo. The residue was purified by column chromatography on SiO<sub>2</sub>.

**General Procedure for the Deprotection and Acetylation of (*R*)-*N*-(Biphenyl-4-yl)methyl 2-*N*-(*tert*-Butoxycarbonyl)amino-3-methoxypropionamide Derivatives (Method F).** A CH<sub>2</sub>Cl<sub>2</sub> solution (0.1–0.3 M) of the (*R*)-*N*-(biphenyl-4-yl)methyl 2-*N*-(*tert*-butoxycarbonyl)amino-3-methoxypropionamide derivative was treated with 4 M HCl in dioxane (3–4 equiv) at room temperature (2–6 h). The reaction mixture was evaporated in vacuo. The resulting residue was

dissolved in CH<sub>2</sub>Cl<sub>2</sub> (0.1–0.3 M) and then triethylamine (2–3 equiv) and acetyl chloride (1.0–1.2 equiv) were carefully added at 0 °C and the resulting solution was stirred at room temperature (2–4 h). The resulting solution was washed with an aqueous 10% citric acid solution followed by a saturated aqueous NaHCO<sub>3</sub> solution. The organic layer was dried (Na<sub>2</sub>SO<sub>4</sub>) and concentrated in vacuo. The residue was purified by column chromatography on SiO<sub>2</sub> and/or recrystallized with EtOAc/hexanes.

**Preparation of (4''-Fluorobiphenyl-4'-yl)methylamine Hydrochloride (29·HCl).** Using Method A, 4-bromobenzylamine (**17**) (5.00 g, 26.9 mmol), 4-fluorophenylboronic acid (**18**) (3.77 g, 26.9 mmol), aqueous 1 M K<sub>2</sub>CO<sub>3</sub> (60 mL), and Pd(PPh<sub>3</sub>)<sub>4</sub> (1.24 g, 1.1 mmol) gave crude **29·HCl** as a yellow solid (4.99 g, 78%): *R<sub>f</sub>* = 0.00 (hexanes/EtOAc 1/2); mp 315–317 °C; <sup>1</sup>H NMR (DMSO-*d*<sub>6</sub>) δ 4.06 (s, CH<sub>2</sub>), 7.28–7.34 (m, 2 ArH), 7.61–7.75 (m, 6 ArH), 8.70 (s, NH<sub>3</sub>Cl); <sup>13</sup>C NMR (DMSO-*d*<sub>6</sub>) δ 41.7 (CH<sub>2</sub>), 115.8 (d, *J* = 21.3 Hz, C<sub>3''</sub>, C<sub>5''</sub>), 126.7 (ArC), 128.7 (d, *J* = 8.0 Hz, C<sub>2''</sub>, C<sub>6''</sub>), 129.6 (ArC), 133.3 (ArC), 136.0 (d, *J* = 3.7 Hz, C<sub>1''</sub>), 139.1 (ArC), 162.0 (d, *J* = 243.2 Hz, C<sub>4''</sub>); HRMS (ESI<sup>+</sup>) 202.1022 [M – Cl]<sup>+</sup> (calcd for C<sub>13</sub>H<sub>12</sub>FNH<sup>+</sup> 202.1032).

**Preparation of (3''-Chlorobiphenyl-4'-yl)methylamine Hydrochloride (30·HCl).** Using Method A, **17** (5.00 g, 26.9 mmol), 3-chlorophenylboronic acid (**19**) (4.21 g, 26.9 mmol), aqueous 1 M K<sub>2</sub>CO<sub>3</sub> (60 mL), and Pd(PPh<sub>3</sub>)<sub>4</sub> (1.24 g, 1.1 mmol) gave crude **30·HCl** as a yellow solid (4.37 g, 64%): *R<sub>f</sub>* = 0.00 (hexanes/EtOAc 1/2); mp 285–287 °C; <sup>1</sup>H NMR (DMSO-*d*<sub>6</sub>) δ 4.07 (s, CH<sub>2</sub>), 7.43–7.76 (m, 8 ArH), 8.75 (s, NH<sub>3</sub>Cl); <sup>13</sup>C NMR (DMSO-*d*<sub>6</sub>) δ 41.7 (CH<sub>2</sub>), 125.4, 126.3, 126.9, 127.4, 129.7, 130.8, 133.8, 134.0, 138.5, 141.6 (ArC); LRMS (ESI<sup>+</sup>) 218.0 [M – Cl]<sup>+</sup> (calcd for C<sub>13</sub>H<sub>12</sub>ClNH<sup>+</sup> 218.0); HRMS (ESI<sup>+</sup>) signal not detected.

**Preparation of (4''-Chlorobiphenyl-4'-yl)methylamine Hydrochloride (31·HCl).** Using Method A, **17** (5.00 g, 26.9 mmol), 4-chlorophenylboronic acid (**20**) (4.21 g, 26.9 mmol), aqueous 1 M K<sub>2</sub>CO<sub>3</sub> (60 mL), and Pd(PPh<sub>3</sub>)<sub>4</sub> (1.24 g, 1.1 mmol) gave crude **31·HCl** as a yellow solid (4.64 g, 68%): *R<sub>f</sub>* = 0.00 (hexanes/EtOAc 1/2); mp 290-292 °C; <sup>1</sup>H NMR (DMSO-*d*<sub>6</sub>) δ 4.07 (s, CH<sub>2</sub>), 7.52–7.73 (m, 8 ArH), 8.77 (s, NH<sub>3</sub>Cl); <sup>13</sup>C NMR (DMSO-*d*<sub>6</sub>) δ 41.7 (CH<sub>2</sub>), 126.7, 128.4, 128.9, 129.7, 132.5, 133.7, 138.3, 138.7 (ArC); LRMS (ESI<sup>+</sup>) 218.0 [M – Cl]<sup>+</sup> (calcd for C<sub>13</sub>H<sub>12</sub>ClNH<sup>+</sup> 218.0); HRMS (ESI<sup>+</sup>) signal not detected.

**Preparation of (3''-Cyanobiphenyl-4'-yl)methylamine (32).** Using Method A, **17** (5.76 g, 30.9 mmol), 3-cyanophenylboronic acid (**21**) (5.00 g, 34.0 mmol), aqueous 1 M K<sub>2</sub>CO<sub>3</sub> (77.3 mL), and Pd(PPh<sub>3</sub>)<sub>4</sub> (1.79 g, 1.5 mmol) gave the desired free amine **32** (7.06 g, 100%) as a colorless oil: *R<sub>f</sub>* = 0.00 (hexanes/EtOAc 1/1); <sup>1</sup>H NMR (CDCl<sub>3</sub>) δ 3.92 (NCH<sub>2</sub>), 7.32–7.83 (m, 8 ArH); <sup>13</sup>C NMR (CDCl<sub>3</sub>) δ 46.1 (CH<sub>2</sub>NH<sub>3</sub>), 113.0 (ArC), 119.0 (CN), 127.3, 128.0, 129.7, 130.6, 130.7, 131.5, 132.1, 137.5, 142.3 (9 ArC); LRMS (ESI<sup>+</sup>) 209.1 [M + H]<sup>+</sup> (calcd for C<sub>14</sub>H<sub>13</sub>N<sub>2</sub><sup>+</sup> 209.1); HRMS (ESI<sup>+</sup>) signal not detected.

**Preparation of (3'-(Trifluoromethyl)-4-biphenylmethammonium Chloride (33·HCl).** Using Method A, **17** (2.45 g, 13.2 mmol), 3-trifluoromethylphenylboronic acid (**22**) (3.00 g, 15.8 mmol), aqueous 1 M K<sub>2</sub>CO<sub>3</sub> (80 mL), and Pd(PPh<sub>3</sub>)<sub>4</sub> (0.61 g, 0.50 mmol) gave **33·HCl** as a pale brownish solid (3.29 g, 87%): *R<sub>f</sub>* = 0.00 (1:1 EtOAc/hexanes); mp 239–240 °C; <sup>1</sup>H NMR (DMSO-*d*<sub>6</sub>) δ 4.08 (q, *J* = 5.5 Hz, Ar-CH<sub>2</sub>), 7.61–7.66 (d, *J* = 8.4 Hz, 2 ArH), 7.69–7.77 (m, 2 ArH), 7.82 (d, *J* = 8.4 Hz, 2 ArH), 7.97–8.04 (m, 2 ArH), 8.56 (br s, NH<sub>3</sub>); <sup>13</sup>C NMR (DMSO-*d*<sub>6</sub>) δ 41.8 (CH<sub>2</sub>), 123.0 (q,

$J = 4.0$  Hz), 124.2 (q,  $J = 272.0$  Hz,  $\text{CF}_3$ ), 124.3 (q,  $J = 4.0$  Hz), 127.1, 129.7 (ArC), 129.8 (q,  $J = 32.0$  Hz), 130.1, 130.8, 134.1, 138.5, 140.5 (ArC); HRMS (ESI<sup>+</sup>): no signal detected.

**Preparation of (3''-Trifluoromethoxybiphenyl-4'-yl)methylamine Hydrochloride (34·HCl).**

Using Method A, **17** (5.00 g, 26.9 mmol), 3-trifluoromethoxyphenylboronic acid (**23**) (5.54 g, 26.9 mmol), aqueous 1 M  $\text{K}_2\text{CO}_3$  (60 mL), and  $\text{Pd}(\text{PPh}_3)_4$  (1.24 g, 1.1 mmol) gave crude **34·HCl** as a yellow solid (6.11 g, 75%):  $R_f = 0.00$  (hexanes/EtOAc 1/2); mp 285-287 °C;  $^1\text{H}$  NMR (DMSO- $d_6$ )  $\delta$ 4.09 (s,  $\text{CH}_2$ ), 7.38–7.40 (m, 1 ArH), 7.60–7.79 (m, 7 ArH), 8.75 (s,  $\text{NH}_3\text{Cl}$ );  $^{13}\text{C}$  NMR (DMSO- $d_6$ )  $\delta$ 41.7 ( $\text{CH}_2$ ), 119.2, 119.9 (ArC), 120.1 (q,  $J = 254.9$  Hz,  $\text{OCF}_3$ ), 125.8, 126.9, 129.7, 130.9, 134.2, 138.3, 141.9, 149.0 (ArC); HRMS (ESI<sup>+</sup>) 268.0951 [ $\text{M} - \text{Cl}$ ]<sup>+</sup> (calcd for  $\text{C}_{14}\text{H}_{12}\text{F}_3\text{NOH}^+$  268.0949).

**Preparation of (4''-Trifluoromethoxybiphenyl-4'-yl)methylamine Hydrochloride (35·HCl).**

Using Method A, **17** (5.00 g, 26.9 mmol), 4-trifluoromethoxyphenylboronic acid (**24**) (5.54 g, 26.9 mmol), aqueous 1 M  $\text{K}_2\text{CO}_3$  (60 mL), and  $\text{Pd}(\text{PPh}_3)_4$  (1.24 g, 1.1 mmol) gave crude **35·HCl** as a yellow solid (5.94 g, 73%):  $R_f = 0.00$  (hexanes/EtOAc 1/2); mp 305-308 °C;  $^1\text{H}$  NMR (DMSO- $d_6$ )  $\delta$ 4.06 (s,  $\text{CH}_2$ ), 7.45 (d,  $J = 8.0$  Hz, 2 ArH), 7.63 (d,  $J = 8.0$  Hz, 2 ArH), 7.72 (d,  $J = 8.6$  Hz, 2 ArH), 7.81 (d,  $J = 8.6$  Hz, 2 ArH);  $^{13}\text{C}$  NMR (DMSO- $d_6$ )  $\delta$ 41.7 ( $\text{CH}_2$ ), 120.1 (q,  $J = 254.9$  Hz,  $\text{OCF}_3$ ), 121.5, 126.9, 128.6, 129.7, 133.8, 138.6, 138.8, 148.0 (ArC); HRMS (ESI<sup>+</sup>) 268.0949 [ $\text{M} - \text{Cl}$ ]<sup>+</sup> (calcd for  $\text{C}_{14}\text{H}_{12}\text{F}_3\text{NOH}^+$  268.0949).

**Preparation of (3''-Acetamidobiphenyl-4'-yl)methylamine (36).** Using Method A, **17** (4.72 g, 25.4 mmol), 3-acetylaminophenylboronic acid (**25**) (5.00 g, 27.9 mmol), aqueous 1 M  $\text{K}_2\text{CO}_3$  (71 mL), and  $\text{Pd}(\text{PPh}_3)_4$  (1.47 g, 1.3 mmol) gave the desired free amine **36** (6.00 g, 86%) as a colorless oil:  $R_f = 0.00$  (hexanes/EtOAc 1/1);  $^1\text{H}$  NMR ( $\text{CDCl}_3$ ,  $\text{CD}_3\text{OD}$ )  $\delta$ 2.11 (s,  $\text{C}(\text{O})\text{CH}_3$ ), 3.80

(NCH<sub>2</sub>), 7.22-7.80 (m, 8 ArH, NHC(O)); <sup>13</sup>C NMR (CDCl<sub>3</sub>) δ 24.3 (C(O)CH<sub>3</sub>), 45.8 (CH<sub>2</sub>NH<sub>2</sub>), 118.7, 119.0, 122.8, 127.4, 127.9, 129.4, 132.2, 134.3, 138.9, 141.5 (10 ArC), 169.5 (NHC(O)); LRMS (ESI<sup>+</sup>) 279.1 [M + K]<sup>+</sup> (calcd for C<sub>15</sub>H<sub>16</sub>N<sub>2</sub>OK<sup>+</sup> 279.1); HRMS (ESI<sup>+</sup>) 279.0937 [M + K]<sup>+</sup> (calcd for C<sub>15</sub>H<sub>16</sub>N<sub>2</sub>OK<sup>+</sup> 279.0900).

**Preparation of (3'-tert-Butoxymethylbiphenyl-4-yl)methylamine Hydrochloride (37·HCl).** Using

Method A, **17** (1.01 g, 5.40 mmol), 3-tert-butoxymethylphenylboronic acid (**26**) (1.00 g, 4.50 mmol), aqueous 1 M K<sub>2</sub>CO<sub>3</sub> (13.5 mL), and Pd(PPh<sub>3</sub>)<sub>4</sub> (0.26 g, 0.23 mmol) gave **37·HCl** as a white solid (0.97 g, 80%): *R<sub>f</sub>* = 0.00 (EtOAc/hexanes 1/1); mp 190-191 °C; <sup>1</sup>H NMR (CDCl<sub>3</sub>, MeOD) δ 1.33 (s, *t*-Bu), 4.13 (s, CH<sub>2</sub>N), 4.52 (s, CH<sub>2</sub>O), 7.35-7.50 (m, 3 ArH), 7.51-7.57 (m, 3 ArH), 7.65 (d, *J* = 8.0 Hz, 2 ArH); <sup>13</sup>C NMR (CDCl<sub>3</sub>, MeOD) δ 27.4 (C(CH<sub>3</sub>)), 43.0 (NHCH<sub>2</sub>), 64.1 (CH<sub>2</sub>O), 73.9 (C(CH<sub>3</sub>)), 125.9, 126.1, 126.9, 127.6, 128.8, 129.3, 131.4, 140.0, 140.1, 141.9 (10 ArC); LRMS (ESI<sup>+</sup>) 270.2 [M + H]<sup>+</sup> (calcd for C<sub>18</sub>H<sub>24</sub>NO<sup>+</sup> 270.2); HRMS (ESI<sup>+</sup>) 292.1677 [M + Na]<sup>+</sup> (calcd for C<sub>18</sub>H<sub>23</sub>NONa<sup>+</sup> 292.1677).

**Preparation of (3'-tert-Butoxycarbonylbiphenyl-4-yl)methylamine Hydrochloride (38·HCl).**

Using Method A, **17** (0.76 g, 4.09 mmol), 3-tert-butoxycarbonylphenylboronic acid (**27**) (1.00 g, 4.50 mmol), aqueous 1 M K<sub>2</sub>CO<sub>3</sub> (10.0 mL), and Pd(PPh<sub>3</sub>)<sub>4</sub> (0.24 g, 0.22 mmol) gave **38·HCl** as a white solid (1.31 g, 70%): *R<sub>f</sub>* = 0.00 (hexanes/EtOAc 1/1); mp 194-197 °C; <sup>1</sup>H NMR (CD<sub>3</sub>OD) δ 1.61 (s, *t*-Bu), 3.91 (d, *J* = 6.0 Hz, CH<sub>2</sub>N), 7.48 (d, *J* = 8.0 Hz, 2 ArH), 7.46 (t, *J* = 8.0 Hz, 1 ArH), 7.59 (d, *J* = 8.0 Hz, 2 ArH), 7.73 (d, *J* = 7.8 Hz, ArH), 7.96 (d, *J* = 7.8 Hz, ArH), 8.22 (s, ArH); <sup>13</sup>C NMR (CD<sub>3</sub>OD) δ 28.4 (C(CH<sub>3</sub>)<sub>3</sub>), 45.0 (CH<sub>2</sub>), 81.3 (C(CH<sub>3</sub>)<sub>3</sub>), 127.5, 128.1, 128.4, 128.7, 128.9, 131.1,

132.7, 138.8, 139.6, 140.8 (10 ArC), 165.8 (C(O)O); LRMS (ESI<sup>+</sup>) 284.1 [M – Cl]<sup>+</sup> (calcd for C<sub>18</sub>H<sub>22</sub>NO<sub>2</sub> 284.2 HRMS (ESI<sup>+</sup>) no signal detected.

#### **Preparation of (3'-N-(tert-Butoxycarbonyl)aminobiphenyl-4-yl)methylamine Hydrochloride**

**(39·HCl)**.<sup>1</sup> Using Method A, **17** (0.78 g, 4.20 mmol), 3-(*N*-tert-butoxycarbonylamino)phenylboronic acid (**28**) (1.00 g, 4.20 mmol), aqueous 1 M K<sub>2</sub>CO<sub>3</sub> (15.0 mL), and Pd(PPh<sub>3</sub>)<sub>4</sub> (0.19 g, 0.20 mmol) gave **39·HCl** as a yellow solid (0.79 g, 56%): *R*<sub>f</sub> = 0.00 (hexanes/EtOAc 1/2); mp 242–244 °C; <sup>1</sup>H NMR (DMSO-*d*<sub>6</sub>) δ 1.49 (s, (CH<sub>3</sub>)<sub>3</sub>), 4.03–4.04 (br m, CH<sub>2</sub>), 7.56–7.68 (m, 8 ArH), 8.59 (s, NH<sub>3</sub>Cl), 9.47 (s, NH); <sup>13</sup>C NMR (DMSO-*d*<sub>6</sub>) δ 28.1 ((CH<sub>3</sub>)<sub>3</sub>), 41.8 (CH<sub>2</sub>), 79.1 (C(CH<sub>3</sub>)<sub>3</sub>), 118.4, 126.1, 126.8, 129.5, 132.6, 133.0, 139.3, 139.8 (ArC), 155.2 (NC(O)O); HRMS (ESI<sup>+</sup>) 321.1630 [M – HCl + Na]<sup>+</sup> (calcd for C<sub>18</sub>H<sub>22</sub>N<sub>2</sub>O<sub>2</sub>Na<sup>+</sup> 321.1620).

**Preparation of 3'-Bromo-4-biphenylmethylamine Hydrochloride (43·HCl)**. Using Method B, 1,3-dibromobenzene (**41**) (4.15 g, 17.6 mmol), a solution of *p*-aminomethylboronic acid (**40**) (3.00 g, 16.0 mmol) in EtOH (5 mL), aqueous 1 M K<sub>2</sub>CO<sub>3</sub> (75 mL), and Pd(PPh<sub>3</sub>)<sub>4</sub> (0.54 g, 0.48 mmol) gave crude **43·HCl** as a yellow-orange solid (3.10 g, 65%): *R*<sub>f</sub> = 0.00 (1:1 EtOAc/hexanes); mp 252–254 °C; <sup>1</sup>H NMR (DMSO-*d*<sub>6</sub>) δ 4.03 (s, CH<sub>2</sub>), 7.38–7.45 (m, ArH), 7.53–7.62 (m, 3 ArH), 7.67–7.75 (m, 3 ArH), 7.86 (t, *J* = 6.8 Hz, ArH), 8.56 (br s, NH<sub>3</sub>); <sup>13</sup>C NMR (DMSO-*d*<sub>6</sub>) δ 41.7 (CH<sub>2</sub>), 122.4, 125.8, 126.9, 129.2, 129.6, 130.4, 131.1, 134.0, 138.5, 141.9 (ArC); HRMS signal not detected.

**Preparation of 3'-Iodo-4-biphenylmethylamine Hydrochloride (44·HCl)**. Using Method B, 1,3-diodobenzene (**42**) (3.90 g, 11.7 mmol), a solution of **40** (2.00 g, 10.7 mmol) in EtOH (5 mL), aqueous 1 M K<sub>2</sub>CO<sub>3</sub> (50 mL), and Pd(PPh<sub>3</sub>)<sub>4</sub> (0.37 g, 0.32 mmol) gave crude **44·HCl** as a yellow-



orange paste (1.92 g, 52%):  $R_f = 0.00$  (1:1 EtOAc/hexanes);  $^1\text{H NMR}$  (DMSO- $d_6$ )  $\delta$  4.06 (s,  $\text{CH}_2$ ), 7.49–7.66 (m, 3 ArH), 7.69 (d,  $J = 8.2$  Hz, 2 ArH), 7.83 (d,  $J = 8.2$  Hz, 2 ArH), 7.93 (s, ArH), 8.57 (br s,  $\text{NH}_3$ );  $^{13}\text{C NMR}$  (DMSO- $d_6$ )  $\delta$  42.3 ( $\text{CH}_2$ ), 96.1, 125.6, 126.5, 127.3, 127.5, 129.4, 130.0, 133.9, 140.5, 140.7 (ArC); HRMS (ESI $^+$ ) 310.0093 [M] $^+$  (calcd for  $\text{C}_{13}\text{H}_{13}\text{ClIN-Cl}^+$  310.0111).

**Preparation of (*R*)-*N*-(4''-Fluorobiphenyl-4'-yl)methyl 2-*N*-(*tert*-Butoxycarbonyl)amino-3-hydroxypropionamide ((*R*)-**46**).** Using Method D, (*R*)-*t*-Boc-D-serine ((*R*)-**45**) (2.00 g, 9.8 mmol), NMM (1.61 mL, 14.6 mmol), IBCF (1.61 mL, 12.4 mmol), and amine **29** (2.36 g, 11.7 mmol, prepared by Method C from **29·HCl**) gave (*R*)-**46** as a white solid (3.40 g, 90%):  $R_f = 0.55$  (hexanes/EtOAc 1/3); mp 140–141 °C;  $[\alpha]_D^{26} +14.5^\circ$  (c 1.1,  $\text{CHCl}_3$ ); IR (nujol) 3145, 2917, 2852, 1658, 1531, 1458, 1378, 1303, 1238, 1169, 1008, 827, 648  $\text{cm}^{-1}$ ;  $^1\text{H NMR}$  ( $\text{CDCl}_3$ )  $\delta$  1.42 (s, ( $\text{CH}_3$ ) $_3$ ), 3.20–3.31 (br m,  $\text{CHH}'$ ), 3.64–3.74 (br m,  $\text{CHH}'$ ), 4.10–4.23 (br m,  $\text{CH}$ ,  $\text{OH}$ ), 4.39–4.54 (br m,  $\text{CH}_2\text{N}$ ), 5.61–5.67 (br d,  $\text{NHCH}$ ), 7.08–7.18 (m, 2 ArH,  $\text{NHCH}_2$ ), 7.29–7.32 (m, 2 ArH), 7.46–7.52 (m, 4 ArH);  $^{13}\text{C NMR}$  (DMSO- $d_6$ )  $\delta$  28.2 (( $\text{CH}_3$ ) $_3$ ), 41.7 ( $\text{NCH}_2$ ), 57.0 ( $\text{OCH}_2\text{CH}$ ), 61.9 ( $\text{OCH}_2\text{CH}$ ), 78.2 ( $\text{C}(\text{CH}_3)_3$ ), 115.7 (d,  $J = 21.3$  Hz,  $\text{C}_3''$ ,  $\text{C}_5''$ ), 126.4, 127.6 (ArC), 128.5 (d,  $J = 8.1$  Hz,  $\text{C}_2''$ ,  $\text{C}_6''$ ), 136.5 (d,  $J = 2.9$  Hz,  $\text{C}_1''$ ), 137.6, 138.7 (ArC), 155.2 ( $\text{NC}(\text{O})\text{O}$ ), 161.8 (d,  $J = 242.5$  Hz,  $\text{C}_4''$ ), 170.5 ( $\text{C}(\text{O})$ ); LRMS ( $\text{M} + \text{Na}$ ) $^+$  (ESI $^+$ ) 411.2 [ $\text{M} + \text{Na}$ ] $^+$  (calcd for  $\text{C}_{21}\text{H}_{25}\text{FN}_2\text{O}_4 \text{Na}^+$  411.2); Anal. Calcd. for  $\text{C}_{21}\text{H}_{25}\text{FN}_2\text{O}_4$ : C, 64.93; H, 6.49; F, 4.89; N, 7.21. Found: C, 64.71; H, 6.53; F, 4.92; N, 7.22.

**Preparation of (*R*)-*N*-(3''-Chlorobiphenyl-4'-yl)methyl 2-*N*-(*tert*-Butoxycarbonyl)amino-3-hydroxypropionamide ((*R*)-**47**).** Using Method D, (*R*)-**45** (3.00 g, 14.7 mmol), NMM (2.42 mL, 22.0 mmol), IBCF (2.42 mL, 18.6 mmol), and amine **30** (3.83 g, 17.6 mmol, prepared by Method C from **30·HCl**) gave (*R*)-**47** as a white solid (4.73 g, 80%):  $R_f = 0.55$  (hexanes/EtOAc 1/3); mp

107-108 °C;  $[\alpha]_D^{26} +13.5^\circ$  (c 1.1, CHCl<sub>3</sub>); IR (nujol) 3316, 2924, 2859, 1659, 1534, 1459, 1378, 1302, 1247, 1170, 1010, 872, 777, 656 cm<sup>-1</sup>; <sup>1</sup>H NMR (DMSO-*d*<sub>6</sub>)  $\delta$  1.41 (s, (CH<sub>3</sub>)<sub>3</sub>), 3.58-3.65 (br m, CH<sub>2</sub>OH), 4.02-4.08 (br m, CH), 4.29-4.42 (br m, CH<sub>2</sub>N), 4.85-4.90 (br m, OH), 6.68 (d, *J* = 8.0 Hz, NHCH), 7.36-7.50 (m, 4 ArH), 7.61-7.70 (m, 4 ArH), 8.37-8.41 (br m, NHCH<sub>2</sub>); <sup>13</sup>C NMR (DMSO-*d*<sub>6</sub>)  $\delta$  28.2 ((CH<sub>3</sub>)<sub>3</sub>), 41.7 (NCH<sub>2</sub>), 57.0 (OCH<sub>2</sub>CH), 61.9 (OCH<sub>2</sub>CH), 78.2 (C(CH<sub>3</sub>)<sub>3</sub>), 125.2, 126.3, 126.6, 127.1, 127.7, 130.7, 133.7, 137.0, 139.5, 142.1 (ArC), 155.2 (NC(O)O), 170.5 (C(O)); LRMS (ESI<sup>+</sup>) 405.2 [M + H]<sup>+</sup> (calcd for C<sub>21</sub>H<sub>25</sub>ClN<sub>2</sub>O<sub>4</sub>H<sup>+</sup> 405.2); Anal. Calcd. for C<sub>21</sub>H<sub>25</sub>ClN<sub>2</sub>O<sub>4</sub>: C, 62.30; H, 6.22; Cl, 8.76; N, 6.92. Found: C, 62.16; H, 6.32; Cl, 8.61; N, 6.99.

**Preparation of (*R*)-*N*-(4''-Chlorobiphenyl-4'-yl)methyl 2-*N*-(*tert*-Butoxycarbonyl)amino-3-hydroxypropionamide ((*R*)-**48**).** Using Method D, (*R*)-**45**, NMM (1.64 mL, 14.9 mmol), IBCF (1.64 mL, 12.7 mmol), and amine **31** (2.60 g, 12.0 mmol, prepared by Method C from **31**·HCl) gave (*R*)-**48** as a white solid (3.72 g, 93%): *R*<sub>f</sub> = 0.55 (hexanes/EtOAc 1/3); mp 148-149 °C;  $[\alpha]_D^{26} +13.4^\circ$  (c 1.0, CHCl<sub>3</sub>); IR (nujol) 3297, 2924, 2859, 1660, 1535, 1459, 1377, 1307, 1248, 1171, 1098, 1007, 805, 645 cm<sup>-1</sup>; <sup>1</sup>H NMR (DMSO-*d*<sub>6</sub>)  $\delta$  1.40 (s, (CH<sub>3</sub>)<sub>3</sub>), 3.57-3.63 (br m, CH<sub>2</sub>OH), 4.00-4.05 (br m, CH), 4.27-4.40 (br m, CH<sub>2</sub>N), 4.83-4.88 (br m, OH), 6.67 (d, *J* = 7.6 Hz, NHCH), 7.36 (d, *J* = 7.8 Hz, 2 ArH), 7.43 (d, *J* = 8.4 Hz, 2 ArH), 7.59 (d, *J* = 7.8 Hz, 2 ArH), 7.67 (d, *J* = 8.4 Hz, 2 ArH), 8.34-8.38 (br m, NHCH<sub>2</sub>); <sup>13</sup>C NMR (DMSO-*d*<sub>6</sub>)  $\delta$  28.2 ((CH<sub>3</sub>)<sub>3</sub>), 41.7 (NCH<sub>2</sub>), 57.0 (OCH<sub>2</sub>CH), 61.8 (OCH<sub>2</sub>CH), 78.2 (C(CH<sub>3</sub>)<sub>3</sub>), 126.4, 127.7, 128.3, 128.8, 132.1, 137.2, 138.8, 139.1 (ArC), 155.2 (NC(O)O), 170.5 (C(O)); LRMS (ESI<sup>+</sup>) 405.2 [M + H]<sup>+</sup> (calcd for C<sub>21</sub>H<sub>25</sub>ClN<sub>2</sub>O<sub>4</sub>H<sup>+</sup> 405.2); Anal. Calcd. for C<sub>21</sub>H<sub>25</sub>ClN<sub>2</sub>O<sub>4</sub>: C, 62.30; H, 6.22; Cl, 8.76; N, 6.92. Found: C, 62.03; H, 6.30; Cl, 8.55; N, 6.84.

**Preparation of (*R*)-*N*-(3''-Bromo-4-biphenylmethyl) 2-*N*-(*tert*-Butoxycarbonyl)amino-3-hydroxypropionamide ((*R*)-**49**).** Using Method D, (*R*)-**45** (2.40 g, 11.7 mmol), NMM (988 mg, 9.8 mmol), IBCF (1.33 g, 9.8 mmol), and **43** (2.56 g, 9.8 mmol, prepared by Method C from **43**·HCl) gave compound (*R*)-**49** as a white solid (2.51 g, 57%):  $R_f = 0.41$  (1:20 MeOH/CH<sub>2</sub>Cl<sub>2</sub>); mp 116–117 °C;  $[\alpha]_D^{23} +11.8^\circ$  ( $c = 1.0$ , CHCl<sub>3</sub>); <sup>1</sup>H NMR (DMSO-*d*<sub>6</sub>)  $\delta$  1.37 (s, (CH<sub>3</sub>)<sub>3</sub>C), 3.51–3.62 (m, CHCH<sub>2</sub>), 3.93–4.04 (m, CHCH<sub>2</sub>), 4.22–4.39 (m, NHCH<sub>2</sub>), 4.82 (t,  $J = 5.7$  Hz, OH), 6.63 (d,  $J = 7.8$  Hz, NHCH), 7.32 (d,  $J = 8.2$  Hz, 2 ArH), 7.38 (t,  $J = 8.0$  Hz, ArH), 7.51 (d,  $J = 6.8$  Hz, ArH), 7.55–7.66 (m, 3 ArH), 7.75–7.82 (m, ArH), 8.33 (t,  $J = 6.0$  Hz, NHCH<sub>2</sub>); <sup>13</sup>C NMR (DMSO-*d*<sub>6</sub>)  $\delta$  28.2 ((CH<sub>3</sub>)<sub>3</sub>C), 41.7 (NHCH<sub>2</sub>), 56.9 (CH), 61.8 (CH<sub>2</sub>OH), 78.2 ((CH<sub>3</sub>)<sub>3</sub>C), 122.3, 125.6, 126.6, 127.6, 129.1, 130.0, 131.0, 136.9, 139.5, 142.4 (ArC), 155.2 (NHC(O)), 170.5 (C(O)); LRMS (ESI<sup>+</sup>) 449.1 [M + H]<sup>+</sup> (100%), 451.1 [M + 2 + H]<sup>+</sup> (100%); HRMS (ESI<sup>+</sup>) 449.1076 [M + H]<sup>+</sup> (calcd for C<sub>21</sub>H<sub>25</sub><sup>79</sup>BrN<sub>2</sub>O<sub>4</sub>H<sup>+</sup> 449.1074).

**Preparation of (*R*)-*N*-(3''-Iodo-4-biphenylmethyl) 2-*N*-(*tert*-Butoxycarbonyl)amino-3-hydroxypropionamide ((*R*)-**50**).** Using Method D, (*R*)-**45** (1.00 g, 4.9 mmol), NMM (448 mg, 4.4 mmol), IBCF (605 mg, 4.4 mmol), and **44** (1.37 g, 4.4 mmol, prepared by Method C from **44**·HCl) gave compound (*R*)-**45** as a white solid (900 mg, 41%):  $R_f = 0.46$  (1:20 MeOH/CH<sub>2</sub>Cl<sub>2</sub>); mp 84-86 °C;  $[\alpha]_D^{24} +10.2^\circ$  ( $c = 1.0$ , CHCl<sub>3</sub>); <sup>1</sup>H NMR (CDCl<sub>3</sub>)  $\delta$  1.40 (s, (CH<sub>3</sub>)<sub>3</sub>C), 3.59–3.61 (m, CHCH<sub>2</sub>), 3.98–4.04 (m CHCH<sub>2</sub>), 4.27–4.39 (m, NHCH<sub>2</sub>), 4.84–4.86 (m, OH), 6.66 (d,  $J = 7.8$  Hz, NHCH), 7.25 (t,  $J = 7.8$  Hz, ArH), 7.35 (d,  $J = 8.2$  Hz, 2 ArH), 7.57–7.60 (m, 2 ArH), 7.65–7.72 (m, 2 ArH), 7.98 (s, ArH), 8.34 – 8.37 (m, NHCH<sub>2</sub>); <sup>13</sup>C NMR (CDCl<sub>3</sub>)  $\delta$  28.2 ((CH<sub>3</sub>)<sub>3</sub>C), 41.7 (NHCH<sub>2</sub>), 57.0 (CH), 61.8 (CH<sub>2</sub>OH), 78.2 ((CH<sub>3</sub>)<sub>3</sub>C), 95.5, 126.0, 126.6, 127.6, 131.0, 134.9, 135.9, 136.9, 139.3, 142.3

(ArC), 155.2 (NHC(O)), 170.5 (C(O)); HRMS (ESI<sup>+</sup>) 497.0937 [M + H]<sup>+</sup> (calcd for C<sub>21</sub>H<sub>25</sub>IN<sub>2</sub>O<sub>4</sub>H<sup>+</sup> 497.0935).

**Preparation of (*R*)-(3''-Cyanobiphenyl-4'-yl)methyl 2-*N*-(*tert*-Butoxycarbonyl)amino-3-**

**hydroxypropionamide ((*R*)-51).** Using Method D, (*R*)-45 (10.22 g, 50.8 mmol), NMM (13.7 g,

135.4 mmol), IBCF (6.94 g, 50.8 mmol), and amine 32 (7.06 g, 33.8 mmol) gave the desired

product (*R*)-51 (6.40 g, 48%) as a colorless oil:  $R_f = 0.32$  (CH<sub>2</sub>Cl<sub>2</sub>/CH<sub>3</sub>OH 19/1);  $[\alpha]_D^{22.5} +12.3^\circ$  (c

1.0, CH<sub>3</sub>OH); <sup>1</sup>H NMR (CDCl<sub>3</sub>/CD<sub>3</sub>OD)  $\delta$  1.38 (s, (CH<sub>3</sub>)<sub>3</sub>C), 3.70-3.75 (br s, CHH'OH), 3.98-4.00 (m,

CHH'OH), 4.23-4.27 (br s, CH), 4.42-4.46 (br s, NHCH<sub>2</sub>), 5.83-5.89 (br s, NHCH), 7.31 (d,  $J = 8.0$  Hz,

2 ArH), 7.39-7.51 (m, 3 ArH, NHCH<sub>2</sub>), 7.56 (d,  $J = 8.0$  Hz, ArH), 7.71 (d,  $J = 8.0$  Hz, 2 ArH); <sup>13</sup>C

NMR (CDCl<sub>3</sub>/CD<sub>3</sub>OD)  $\delta$  28.4 (C(CH<sub>3</sub>)<sub>3</sub>), 43.0 (NCH<sub>2</sub>), 55.6 (CH), 62.9 (OCH<sub>2</sub>), 80.6 (C(CH<sub>3</sub>)<sub>3</sub>), 113.0

(ArC), 119.0 (CN), 127.3, 128.7, 129.2, 130.4, 131.1, 131.4, 137.9, 138.1, 142.9 (9 ArC), 156.3

((CH<sub>3</sub>)<sub>3</sub>CN(H)C(O)O), 171.6 (C(O)); LRMS (ESI<sup>+</sup>) 396.2 [M + H]<sup>+</sup> (calcd for C<sub>22</sub>H<sub>26</sub>N<sub>3</sub>O<sub>4</sub><sup>+</sup> 396.2);

HRMS (ESI<sup>+</sup>) 396.1924 [M + H]<sup>+</sup> (calcd for C<sub>22</sub>H<sub>26</sub>N<sub>3</sub>O<sub>4</sub><sup>+</sup> 396.1923).

**Preparation of (*R*)-*N*-(3''-Trifluoromethyl)-4-biphenylmethyl 2-*N*-(*tert*-Butoxycarbonyl) amino-**

**3-hydroxypropionamide ((*R*)-52).** Using Method D, (*R*)-45 (930 mg, 4.5 mmol), NMM (417 mg,

4.1 mmol), IBCF (563 mg, 4.1 mmol), and amine 33 (1.04 g, 4.1 mmol, prepared by Method C

from 33·HCl) gave compound (*R*)-52 as a white solid (1.53 g, 77%):  $R_f = 0.58$  (1:20

MeOH/CH<sub>2</sub>Cl<sub>2</sub>); mp 128–129 °C;  $[\alpha]_D^{22} = +12.8^\circ$  (c = 1.0, CHCl<sub>3</sub>); <sup>1</sup>H NMR (DMSO-*d*<sub>6</sub>)  $\delta$  1.40

((CH<sub>3</sub>)<sub>3</sub>C), 3.54–3.65 (m, CHCH<sub>2</sub>), 3.96–4.07 (m, CHCH<sub>2</sub>), 4.26–4.44 (m, NHCH<sub>2</sub>), 4.86 (t,  $J = 5.7$

Hz, OH), 6.67 (d,  $J = 8.2$  Hz, NHCH), 7.39 (d,  $J = 8.2$  Hz, 2 ArH), 7.64–7.74 (m, 4 ArH), 7.90–8.01

(m, 2 ArH), 8.38 (t,  $J = 5.9$  Hz, NHCH<sub>2</sub>); <sup>13</sup>C NMR (DMSO-*d*<sub>6</sub>)  $\delta$  28.1 ((CH<sub>3</sub>)<sub>3</sub>C), 41.7 (NHCH<sub>2</sub>), 57.0

(CH), 61.8 (CH<sub>2</sub>OH), 78.2 ((CH<sub>3</sub>)<sub>3</sub>C), 122.9 (q,  $J = 4.0$  Hz), 123.9 (q,  $J = 4.0$  Hz), 124.2 (q,  $J = 272.0$

Hz, CF<sub>3</sub>), 126.7, 127.7 (ArC), 129.7 (q, *J* = 32.0 Hz), 130.0, 130.7, 136.9, 139.6, 141.0 (ArC), 155.2 (NHC(O)), 170.5 (C(O)); LRMS (ESI<sup>+</sup>) 439.2 [M + H]<sup>+</sup> (calcd for C<sub>22</sub>H<sub>26</sub>F<sub>3</sub>N<sub>2</sub>O<sub>4</sub><sup>+</sup> 439.2); HRMS (ESI<sup>+</sup>) 439.1874 [M + H]<sup>+</sup> (calcd for C<sub>22</sub>H<sub>26</sub>F<sub>3</sub>N<sub>2</sub>O<sub>4</sub><sup>+</sup> 439.1844).

**Preparation of (*R*)-*N*-(3''-Trifluoromethoxybiphenyl-4'-yl)methyl 2-*N*-(*tert*-**

**Butoxycarbonyl)amino-3-hydroxypropionamide ((*R*)-53).** Using Method D, (*R*)-45 (2.09 g, 10.2 mmol), NMM (1.68 mL, 15.3 mmol), IBCF (1.68 mL, 13.0 mmol), and amine 34 (3.27 g, 12.2 mmol, prepared by Method C from 34·HCl) gave (*R*)-53 as a white solid (3.79 g, 82%): *R*<sub>f</sub> = 0.55 (hexanes/EtOAc 1/3); mp 96-97 °C; [α]<sub>D</sub><sup>26</sup> +13.0° (c 1.1, CHCl<sub>3</sub>); IR (nujol) 3176, 2949, 2850, 1689, 1657, 1530, 1458, 1374, 1294, 1159, 1085, 997, 788, 724 cm<sup>-1</sup>; <sup>1</sup>H NMR (CDCl<sub>3</sub>) δ 1.43 (s, (CH<sub>3</sub>)<sub>3</sub>), 3.08-3.22 (br m, CHH'), 3.66-3.74 (br m, CHH'), 4.12-4.22 (br m, CH, OH), 4.39-4.59 (br m, CH<sub>2</sub>N), 5.60-5.65 (br d, NHCH), 7.12-7.54 (m, 8 ArH, NHCH<sub>2</sub>); <sup>13</sup>C NMR (DMSO-*d*<sub>6</sub>) δ 28.2 ((CH<sub>3</sub>)<sub>3</sub>), 41.7 (NCH<sub>2</sub>), 57.0 (OCH<sub>2</sub>CH), 61.9 (OCH<sub>2</sub>CH), 78.2 (C(CH<sub>3</sub>)<sub>3</sub>), 119.1, 119.6 (ArC), 120.1 (d, *J* = 254.9 Hz, OCF<sub>3</sub>), 125.7, 126.7, 127.7, 130.8, 136.8, 139.7, 142.4, 149.0 (ArC), 155.2 (NC(O)O), 170.5 (C(O)); LRMS (ESI<sup>+</sup>) 477.1 [M + Na]<sup>+</sup> (calcd for C<sub>22</sub>H<sub>25</sub>F<sub>3</sub>N<sub>2</sub>O<sub>5</sub>Na<sup>+</sup> 477.2); Anal. Calcd. for C<sub>22</sub>H<sub>25</sub>F<sub>3</sub>N<sub>2</sub>O<sub>5</sub>: C, 58.15; H, 5.54; F, 12.54; N, 6.16. Found: C, 57.99; H, 5.68; F, 12.40; N, 6.11.

**Preparation of (*R*)-*N*-(4''-Trifluoromethoxybiphenyl-4'-yl)methyl 2-*N*-(*tert*-**

**Butoxycarbonyl)amino-3-hydroxypropionamide ((*R*)-54).** Using Method D, (*R*)-45 (1.03 g, 5.0 mmol), NMM (0.82 mL, 7.5 mmol), IBCF (0.82 mL, 7.5 mmol), and amine 35 (1.60 g, 6.0 mmol, prepared by Method C from 35·HCl) gave (*R*)-54 as a white solid (1.92 g, 83%): *R*<sub>f</sub> = 0.55 (hexanes/EtOAc 1/3); mp 166-167 °C; [α]<sub>D</sub><sup>26</sup> +13.3° (c 0.8, CHCl<sub>3</sub>); IR (nujol) 3304, 2924, 2859, 1658, 1534, 1457, 1378, 1284, 1230, 1162, 1009, 835, 647 cm<sup>-1</sup>; <sup>1</sup>H NMR (CDCl<sub>3</sub>) δ 1.42 (s, (CH<sub>3</sub>)<sub>3</sub>), 3.30-3.40 (br m, CHH'), 3.64-3.74 (br m, CHH'), 4.11-4.22 (br m, CH, OH), 4.40-4.56 (br

m, CH<sub>2</sub>N), 5.64–5.69 (br d, NHCH), 7.20–7.34 (m, 4 ArH, NHCH<sub>2</sub>), 7.47–7.56 (m, 4 ArH); <sup>13</sup>C NMR (DMSO-*d*<sub>6</sub>) δ 28.2 ((CH<sub>3</sub>)<sub>3</sub>), 41.7 (NCH<sub>2</sub>), 57.0 (OCH<sub>2</sub>CH), 61.8 (OCH<sub>2</sub>CH), 78.2 (C(CH<sub>3</sub>)<sub>3</sub>), 120.1 (d, *J* = 254.9 Hz, OCF<sub>3</sub>), 121.4, 126.6, 127.7, 128.4, 137.1, 139.2, 139.3, 147.7 (ArC), 155.2 (NC(O)O), 170.5 (C(O)); LRMS (ESI<sup>+</sup>) 587.0 [M + Cs]<sup>+</sup> (calcd for C<sub>22</sub>H<sub>25</sub>F<sub>3</sub>N<sub>2</sub>O<sub>5</sub>Cs<sup>+</sup> 587.1); Anal. Calcd. for C<sub>22</sub>H<sub>25</sub>F<sub>3</sub>N<sub>2</sub>O<sub>5</sub>: C, 58.15; H, 5.54; F, 12.54; N, 6.16. Found: C, 58.09; H, 5.67; F, 12.40; N, 6.25.

**Preparation of (*R*)-*N*-(3''-Acetylamino-biphenyl-4'-yl)methyl 2-*N*-(*tert*-Butoxycarbonyl)amino-3-hydroxypropionamide ((*R*)-**55**).** Using Method D, (*R*)-**45** (7.54 g, 37.5 mmol), NMM (10.1 g, 99.9 mmol), IBCF (5.12 g, 37.5 mmol), and amine **36** (6.00 g, 25.0 mmol) gave the desired product (*R*)-**55** (4.00 g, 38%) as a colorless oil: *R*<sub>f</sub> = 0.17 (CH<sub>2</sub>Cl<sub>2</sub>/CH<sub>3</sub>OH 19/1); [α]<sub>D</sub><sup>22.5</sup> +17.3 ° (c 1.0, CH<sub>3</sub>OH); <sup>1</sup>H NMR (CDCl<sub>3</sub>) δ 1.41 (s, (CH<sub>3</sub>)<sub>3</sub>C), 2.14 (s, CH<sub>3</sub>CO), 3.65–3.57 (m, CHH'OH), 3.97–4.07 (m, CHH'OH), 4.17–4.24 (br s, CH), 4.24–4.46 (m, NHCH<sub>2</sub>), 5.73–5.77 (br d, NHCH), 7.19 (m, 3 ArH), 7.31 (t, *J* = 8.0 Hz, ArH), 7.41 (d, *J* = 8.0 Hz, 2 ArH), 7.47 (d, *J* = 8.0 Hz, ArH), 7.62 (s, ArH), 7.95 (br s, ArNHC(O)); <sup>13</sup>C NMR (CDCl<sub>3</sub>) δ 24.7 (CH<sub>3</sub>CO), 28.4 (C(CH<sub>3</sub>)<sub>3</sub>), 43.3 (NCH<sub>2</sub>), 55.4 (CH), 63.0 (OCH<sub>2</sub>), 80.8 (C(CH<sub>3</sub>)<sub>3</sub>), 118.8, 119.2, 123.1, 127.5, 128.0, 129.6, 137.2, 138.6, 140.0, 141.6 (10 ArC), 156.5 ((CH<sub>3</sub>)<sub>3</sub>CN(H)C(O)O), 169.1, 171.6 (2 C(O)); LRMS (ESI<sup>+</sup>) 428.2 [M + H]<sup>+</sup> (calcd for C<sub>23</sub>H<sub>29</sub>N<sub>3</sub>O<sub>5</sub>H<sup>+</sup> 428.2); HRMS (ESI<sup>+</sup>) 450.2007 [M + Na]<sup>+</sup> (calcd for C<sub>23</sub>H<sub>29</sub>N<sub>3</sub>O<sub>5</sub>Na<sup>+</sup> 450.2005).

**Preparation of (*R*)-2-*N*-Acetamido-3-hydroxypropionate Benzyl Ester ((*R*)-**67**).** To a suspension of D-serine benzyl ester hydrochloride ((*R*)-**66**) (5.00 g, 21.6 mmol) in CH<sub>2</sub>Cl<sub>2</sub> (100 mL) was added triethylamine (4.59 g, 45.3 mmol) at –20 °C under Ar and stirred (10 min). To the resulting solution was added AcCl (1.52 g, 19.4 mmol) at –20 °C under Ar and then stirred (4 h). The reaction mixture was filtered and washed with aqueous 0.5 M HCl (2 × 100 mL) and brine (2

× 40 mL). The organic layer was dried (Na<sub>2</sub>SO<sub>4</sub>) and evaporated in vacuo. The residue was purified by column chromatography (CH<sub>2</sub>Cl<sub>2</sub>/MeOH 19/1) to give the desired product (*R*)-**66** (6.07 g, 100%) as a white solid: *R<sub>f</sub>* = 0.26 (CH<sub>2</sub>Cl<sub>2</sub>/MeOH 19/1); mp 78-79 °C; [ $\alpha$ ]<sub>D</sub><sup>25</sup> – 20.6 ° (c 1.0, CHCl<sub>3</sub>); <sup>1</sup>H NMR (CDCl<sub>3</sub>)  $\delta$  1.96 (s, CH<sub>3</sub>C(O)), 3.72-3.84 (m, HOCHH'), 3.90-3.97 (m, HOCHH'), 4.61-4.64 (m, CH), 5.14 (s, OCH<sub>2</sub>Ph), 6.91 (d, *J* = 7.6 Hz, NHC(O)), 7.24-7.38 (m, 5 ArH); <sup>13</sup>C NMR (CDCl<sub>3</sub>)  $\delta$  23.0 (CH<sub>3</sub>C(O)), 55.0 (CH), 62.9 (HOCH<sub>2</sub>), 67.5 (OCH<sub>2</sub>Ph), 128.2, 128.6, 128.7, 135.3 (4 ArC), 170.7 (CHCO(O)), 171.3 (CH<sub>3</sub>C(O)); HRMS (ESI<sup>+</sup>) 238.1078 [M + H]<sup>+</sup> (calcd for C<sub>12</sub>H<sub>16</sub>NO<sub>4</sub><sup>+</sup> 238.1079).

**Preparation of (*R*)-2-*N*-Acetamido-3-methoxypropionate Benzyl Ester ((*R*)-**68**).** To a solution of (*R*)-**67** (1.00 g, 4.2 mmol) in acetonitrile (50 mL) was added CH<sub>3</sub>I (5.98 gm 42.2 mmol) and Ag<sub>2</sub>O (4.88 g, 21.1 mmol) at room temperature under Ar and stirred (36 h). The reaction mixture was filtered through Celite and concentrated in vacuo. The residue was purified by SiO<sub>2</sub> column chromatography (EtOAc/hexanes 1/1) to give the desired product (*R*)-**68** (1.06 g, 100%) as a white solid: *R<sub>f</sub>* = 0.23 (EtOAc/hexanes 1/1); mp 80-81 °C; [ $\alpha$ ]<sub>D</sub><sup>25</sup> – 23.3 ° (c 1.0, CHCl<sub>3</sub>); <sup>1</sup>H NMR (CDCl<sub>3</sub>)  $\delta$  2.05 (s, CH<sub>3</sub>C(O)), 3.29 (s, OCH<sub>3</sub>), 3.62 (dd, *J* = 3.2, 9.2 Hz, OCHH'), 3.81 (dd, *J* = 3.2, 9.2 Hz, OCHH'), 4.76-4.80 (m, CH), 5.16 (½AB<sub>q</sub>, *J* = 12.2 Hz, OCHH'Ph), 5.26 (½AB<sub>q</sub>, *J* = 12.2 Hz, OCHH'Ph), 6.27-6.38 (br s, NHC(O)), 7.27-7.38 (m, 5 ArH), addition of excess (*R*)-(-)-mandelic acid to a CDCl<sub>3</sub> solution of the product gave only one signal for the acetyl methyl and one signal for the ether methyl protons; <sup>13</sup>C NMR (CDCl<sub>3</sub>)  $\delta$  23.4 (CH<sub>3</sub>C(O)), 53.0 (CH), 59.4 (OCH<sub>3</sub>), 67.5 (OCH<sub>2</sub>Ph), 72.5 (CH<sub>3</sub>OCH<sub>2</sub>), 128.3, 128.6, 128.8, 135.6 (4 ArC), 170.1 (CHCO(O)), 170.5 (CH<sub>3</sub>C(O)); LRMS (ESI<sup>+</sup>) 274.1 [M + H]<sup>+</sup> (calcd for C<sub>13</sub>H<sub>18</sub>NO<sub>4</sub><sup>+</sup> 274.1); Anal. Calcd. for C<sub>13</sub>H<sub>17</sub>NO<sub>4</sub>: C, 62.14; H, 6.82; N, 5.57. Found: C, 62.27; H, 6.72; N, 5.77.

**Preparation of (*R*)-2-*N*-Acetamido-3-hydroxypropionic Acid ((*R*)-69).** To a solution of (*R*)-2-*N*-acetamido-3-hydroxypropionate benzyl ester ((*R*)-67) (1.47 g, 10.0 mmol) in MeOH (150 mL) was added Pd on activated carbon (10% Pd/C, wet) (0.53 g, 0.5 mmol) at room temperature and stirred (1 h) under H<sub>2</sub>. The reaction mixture was filtered through Celite and concentrated in vacuo. The resulting residue was further dried under high vacuum (15-24 h) and (*R*)-69 was used without further purification:  $R_f = 0.00$  (EtOAc);  $[\alpha]_D^{25} - 26.0^\circ$  (c 1.0, MeOH).

**Preparation of (*R*)-2-*N*-Acetamido-3-methoxypropionic Acid<sup>2</sup> ((*R*)-70).** To a solution of (*R*)-2-*N*-acetamido-3-methoxypropionate benzyl ester ((*R*)-68) (0.25 g, 1.0 mmol) in MeOH (15 mL) was added Pd on activated carbon (10% Pd/C, wet) (53.2 mg, 0.05 mmol) at room temperature and stirred (30 min) under H<sub>2</sub>. The reaction mixture was filtered through Celite and concentrated in vacuo. The resulting residue (*R*)-70 was further dried under high vacuum (15 h) and used without further purification:  $R_f = 0.00$  (EtOAc);  $[\alpha]_D^{25} - 19.2^\circ$  (c 1.0, MeOH); <sup>1</sup>H NMR (CDCl<sub>3</sub>)  $\delta$  2.04 (s, CH<sub>3</sub>C(O)), 3.33 (s, OCH<sub>3</sub>), 3.58-3.65 (m, OCHH'), 3.75-3.85 (m, OCHH'), 4.63-4.76 (br s, CH), 6.75-6.95 (m, NHC(O), C(O)OH); <sup>13</sup>C NMR (CDCl<sub>3</sub>)  $\delta$  22.9 (CH<sub>3</sub>C(O)), 52.9 (CH), 59.3 (OCH<sub>3</sub>), 72.1 (CH<sub>3</sub>OCH<sub>2</sub>), 171.7 (CH<sub>3</sub>C(O)), 172.4 (CHCO(O)H).

**Preparation of (*R*)-*N*-(3''-tert-Butoxymethylbiphenyl-4'-yl)methyl 2-Acetamido-3-hydroxypropionamide ((*R*)-71).** Using Method D, (*R*)-2-acetamido-3-hydroxypropionic acid ((*R*)-69) (1.70 g, 11.5 mmol), anhydrous THF/DMSO (150 mL/15 mL), NMM (1.17 g, 11.5 mmol), IBCF (1.26 g, 9.2 mmol), and amine 37 (2.07 g, 7.7 mmol, prepared by Method C from 37·HCl) gave the desired product (*R*)-70 (1.03 g, 34%) as a white solid:  $R_f = 0.11$  (EtOAc/hexanes 1/1); mp 125-126 °C;  $[\alpha]_D^{22.5} + 9.6^\circ$  (c 1.0, CH<sub>3</sub>OH); <sup>1</sup>H NMR (CDCl<sub>3</sub>/CD<sub>3</sub>OD)  $\delta$  1.24 (s, (CH<sub>3</sub>)<sub>3</sub>C), 1.95 (s,



CH<sub>3</sub>C(O)), 3.29-3.64 (m, CHH'OH), 3.81-3.87 (m, CHH'OH), 4.35-4.45 (m, CH, CH<sub>2</sub>O, CH<sub>2</sub>N), 7.23-7.45 (m, 5 ArH), 7.46-7.52 (m, 3 ArH); <sup>13</sup>C NMR (CDCl<sub>3</sub>/CD<sub>3</sub>OD) δ 22.8 (CH<sub>3</sub>C(O)), 27.7 (C(CH<sub>3</sub>)<sub>3</sub>), 43.1 (NCH<sub>2</sub>), 54.8 (CH), 62.5 (OCH<sub>2</sub>), 64.3 (ArCH<sub>2</sub>O), 73.9 (C(CH<sub>3</sub>)<sub>3</sub>), 126.0, 126.3, 126.7, 127.4, 127.9, 128.8, 139.8, 140.3, 140.5, 140.7 (10 ArC), 170.9, 171.7 (2 C(O)NH); LRMS (ESI<sup>+</sup>) 399.2 [M + H]<sup>+</sup> (calcd for C<sub>23</sub>H<sub>30</sub>N<sub>2</sub>O<sub>4</sub>H<sup>+</sup> 399.2); HRMS (ESI<sup>+</sup>) 399.2285 [M + H]<sup>+</sup> (calcd for C<sub>23</sub>H<sub>30</sub>N<sub>2</sub>O<sub>4</sub>H<sup>+</sup> 399.2284).

**Preparation of (R)-N-(3''-tert-Butoxycarbonylbiphenyl-4'-yl)methyl 2-Acetamido-3-hydroxypropionamide ((R)-72).** Using Method D, (R)-69 (1.20 g, 8.2 mmol), anhydrous THF/DMSO (90 mL/9 mL), NMM (1.24 g, 12.3 mmol), IBCF (1.12 g, 8.2 mmol), and amine 38 (2.32 g, 8.2 mmol, prepared by Method C from 38·HCl) gave the desired product (R)-72 (0.86 g, 50%) as a white solid: R<sub>f</sub> = 0.12 (EtOAc/hexanes 1/1); mp 123-124 °C; [α]<sup>22.5</sup><sub>D</sub> +10.7 ° (c 1.0, CH<sub>3</sub>OH); <sup>1</sup>H NMR (CDCl<sub>3</sub>/CD<sub>3</sub>OD) δ 1.62 (s, (CH<sub>3</sub>)<sub>3</sub>C), 2.05 (s, CH<sub>3</sub>C(O)), 3.67-3.72 (m, CHH'OH), 3.94-3.99 (m, CHH'OH), 4.41-4.52 (m, CH, CH<sub>2</sub>N), 7.29 (d, J = 7.8 Hz, 2 ArH), 7.48 (m, ArH), 7.58 (d, J = 7.8 Hz, 2 ArH), 7.74 (d, J = 7.6 Hz, ArH), 7.96 (d, J = 7.6 Hz, ArH), 8.18 (s, ArH); <sup>13</sup>C NMR (CDCl<sub>3</sub>/CD<sub>3</sub>OD) δ 23.0 (CH<sub>3</sub>C(O)), 28.3 (C(CH<sub>3</sub>)<sub>3</sub>), 43.2 (NCH<sub>2</sub>), 54.6 (CH), 62.6 (OCH<sub>2</sub>), 81.36 (C(CH<sub>3</sub>)<sub>3</sub>), 127.5, 128.1, 128.2, 128.4, 128.9, 131.1, 132.6, 137.4, 139.6, 141.9 (10 ArC), 166.5 (ArC(O)), 171.0, 171.5 (2 C(O)NH); LRMS (ESI<sup>+</sup>) 413.2 [M + H]<sup>+</sup> (calcd for C<sub>23</sub>H<sub>28</sub>N<sub>2</sub>O<sub>5</sub>H<sup>+</sup> 413.2); HRMS (ESI<sup>+</sup>) 413.2079 [M + H]<sup>+</sup> (calcd for C<sub>23</sub>H<sub>28</sub>N<sub>2</sub>O<sub>5</sub>H<sup>+</sup> 413.2076).

**Preparation of (R)-N-(4''-Fluorobiphenyl-4'-yl)methyl 2-N-(tert.-Butoxycarbonyl)amino-3-methoxypropionamide ((R)-56).** Using Method E, (R)-46 (3.50 g, 9.0 mmol), Ag<sub>2</sub>O (10.45 g, 45.1 mmol), and CH<sub>3</sub>I (5.63 mL, 90.2 mmol) gave (R)-56 as a white solid (3.40 g, 94%): R<sub>f</sub> = 0.40

(hexanes/EtOAc 1/1); mp 108-109 °C;  $[\alpha]_D^{26} -19.7^\circ$  (c 1.2, CHCl<sub>3</sub>); IR (nujol) 3172, 2952, 2862, 1653, 1529, 1458, 1374, 1240, 1169, 1116, 1062, 818, 723, 611 cm<sup>-1</sup>; <sup>1</sup>H NMR (DMSO-*d*<sub>6</sub>)  $\delta$  1.41 (s, (CH<sub>3</sub>)<sub>3</sub>), 3.27 (s, OCH<sub>3</sub>), 3.51-3.56 (br m, CH<sub>2</sub>O), 4.21-4.26 (br m, CH), 4.30-4.41 (br m, CH<sub>2</sub>N), 6.87 (d, *J* = 8.0 Hz, NHCH), 7.25-7.40 (m, 4 ArH), 7.57-7.70 (m, 4 ArH), 8.46-8.49 (br t, NHCH<sub>2</sub>); <sup>13</sup>C NMR (DMSO-*d*<sub>6</sub>)  $\delta$  28.1 ((CH<sub>3</sub>)<sub>3</sub>), 41.8 (NCH<sub>2</sub>), 54.4 (OCH<sub>2</sub>CH), 58.1 (OCH<sub>3</sub>), 72.0 (OCH<sub>2</sub>CH), 78.2 (C(CH<sub>3</sub>)<sub>3</sub>), 115.6 (d, *J* = 21.2 Hz, C<sub>3''</sub>, C<sub>5''</sub>), 126.4 (ArC), 127.6 (ArC), 128.5 (d, *J* = 8.1 Hz, C<sub>2''</sub>, C<sub>6''</sub>), 136.4 (d, *J* = 2.9 Hz, C<sub>1''</sub>), 137.6 (ArC), 138.6 (ArC), 155.2 (NC(O)O), 161.8 (d, *J* = 242.5 Hz, C<sub>4''</sub>), 170.5 (C(O)); LRMS (ESI<sup>+</sup>) 425.2 [M + Na]<sup>+</sup> (calcd for C<sub>22</sub>H<sub>27</sub>FN<sub>2</sub>O<sub>4</sub>Na<sup>+</sup> 425.2); Anal. Calcd. for C<sub>22</sub>H<sub>27</sub>FN<sub>2</sub>O<sub>4</sub>: C, 65.66; H, 6.67; F, 4.72; N, 6.96. Found: C, 65.58; H, 6.65; F, 4.53; N, 6.84.

**Preparation of (*R*)-*N*-(3''-Chlorobiphenyl-4'-yl)methyl 2-*N*-(*tert*-Butoxycarbonyl)amino-3-methoxypropionamide ((*R*)-57).** Using Method E, (*R*)-47 (4.00 g, 9.9 mmol), Ag<sub>2</sub>O (11.47 g, 49.5 mmol), and CH<sub>3</sub>I (6.18 mL, 99.0 mmol) gave (*R*)-57 as a sticky foam (4.00 g, 97%): *R<sub>f</sub>* = 0.40 (hexanes/EtOAc 1/1);  $[\alpha]_D^{26} -17.0^\circ$  (c 1.1, CHCl<sub>3</sub>); IR (nujol) 3162, 2923, 2857, 1659, 1459, 1375, 1247, 1164, 1109, 874, 771 cm<sup>-1</sup>; <sup>1</sup>H NMR (DMSO-*d*<sub>6</sub>)  $\delta$  1.40 (s, (CH<sub>3</sub>)<sub>3</sub>), 3.26 (s, OCH<sub>3</sub>), 3.48-3.53 (br m, CH<sub>2</sub>O), 4.16-4.22 (br m, CH), 4.27-4.39 (br m, CH<sub>2</sub>N), 6.86 (d, *J* = 8.0 Hz, NHCH), 7.33-7.50 (m, 4 ArH), 7.61-7.70 (m, 4 ArH), 8.44-8.48 (br t, NHCH<sub>2</sub>); <sup>13</sup>C NMR (DMSO-*d*<sub>6</sub>)  $\delta$  28.1 ((CH<sub>3</sub>)<sub>3</sub>), 41.7 (NCH<sub>2</sub>), 54.3 (OCH<sub>2</sub>CH), 58.1 (OCH<sub>3</sub>), 72.0 (OCH<sub>2</sub>CH), 78.2 (C(CH<sub>3</sub>)<sub>3</sub>), 125.2, 126.2, 126.6, 127.1, 127.6, 130.7, 133.7, 137.0, 139.3, 142.1 (ArC), 155.2 (NC(O)O), 170.1 (C(O)); LRMS (ESI<sup>+</sup>) 419.2 [M + H]<sup>+</sup> (calcd for C<sub>22</sub>H<sub>27</sub>ClN<sub>2</sub>O<sub>4</sub>H<sup>+</sup> 419.2); Anal. Calcd. for C<sub>22</sub>H<sub>27</sub>ClN<sub>2</sub>O<sub>4</sub>: C, 63.08; H, 6.50; Cl, 8.46; N, 6.69. Found: C, 62.94; H, 6.67; Cl, 8.24; N, 6.65.

**Preparation of (*R*)-*N*-(4''-Chlorobiphenyl-4'-yl)methyl 2-*N*-(*tert*-Butoxycarbonyl)amino-3-methoxypropionamide ((*R*)-58).** Using Method E, (*R*)-48 (3.60 g, 8.9 mmol), Ag<sub>2</sub>O (10.32 g, 44.5 mmol), and CH<sub>3</sub>I (5.56 mL, 89.1 mmol) gave (*R*)-58 as a white solid (3.27 g, 88%): *R*<sub>f</sub> = 0.40 (hexanes/EtOAc 1/1); mp 97-98 °C; [α]<sub>D</sub><sup>26</sup> -19.3° (c 1.0, CHCl<sub>3</sub>); IR (nujol) 3155, 2967, 2850, 1662, 1530, 1458, 1376, 1308, 1247, 1166, 1100, 1048, 806, 722 cm<sup>-1</sup>; <sup>1</sup>H NMR (DMSO-*d*<sub>6</sub>) δ 1.40 (s, (CH<sub>3</sub>)<sub>3</sub>), 3.26 (s, OCH<sub>3</sub>), 3.47-3.53 (br m, CH<sub>2</sub>O), 4.17-4.22 (br m, CH), 4.28-4.39 (br m, CH<sub>2</sub>N), 6.87 (d, *J* = 8.0 Hz, NHCH), 7.34 (d, *J* = 7.2 Hz, 2 ArH), 7.50 (d, *J* = 8.0 Hz, 2 ArH), 7.60 (d, *J* = 7.2 Hz, 2 ArH), 7.68 (d, *J* = 8.0 Hz, 2 ArH), 8.44-8.47 (br t, NHCH<sub>2</sub>); <sup>13</sup>C NMR (DMSO-*d*<sub>6</sub>) δ 28.1 ((CH<sub>3</sub>)<sub>3</sub>), 41.7 (NCH<sub>2</sub>), 54.3 (OCH<sub>2</sub>CH), 58.1 (OCH<sub>3</sub>), 72.0 (OCH<sub>2</sub>CH), 78.2 (C(CH<sub>3</sub>)<sub>3</sub>), 126.4, 127.6, 128.3, 128.8, 132.2, 137.2, 138.8, 139.0 (ArC), 155.2 (NC(O)O), 170.0 (C(O)); LRMS (ESI<sup>+</sup>) 419.2 [M + H]<sup>+</sup> (calcd for C<sub>22</sub>H<sub>27</sub>ClN<sub>2</sub>O<sub>4</sub>H<sup>+</sup> 419.2); Anal. Calcd. for C<sub>22</sub>H<sub>27</sub>ClN<sub>2</sub>O<sub>4</sub>: C, 63.08; H, 6.50; Cl, 8.46; N, 6.69. Found: C, 62.88; H, 6.52; Cl, 8.17; N, 6.68.

**Preparation of (*R*)-*N*-(3''-Bromo-4-biphenylmethyl) 2-*N*-(*tert*-Butoxycarbonyl)amino-3-methoxypropionamide ((*R*)-59).** Using Method E, Ag<sub>2</sub>O (4.30 g, 18.7 mmol), MeI (5.31 g, 37.4 mmol), and (*R*)-49 (1.68 g, 3.7 mmol) gave compound (*R*)-59 as a colorless sticky foam (1.32 g, 76%): *R*<sub>f</sub> = 0.48 (1:20 MeOH/CH<sub>2</sub>Cl<sub>2</sub>); [α]<sub>D</sub><sup>24</sup> -13.3° (c = 1.0, CHCl<sub>3</sub>); <sup>1</sup>H NMR (CDCl<sub>3</sub>) δ 1.44 (s, (CH<sub>3</sub>)<sub>3</sub>C), 3.38 (s, OCH<sub>3</sub>), 3.52 (dd, *J* = 3.4, 9.1 Hz, CHH'OCH<sub>3</sub>), 3.85 (dd, *J* = 3.7, 9.1 Hz, CHH'OCH<sub>3</sub>), 4.23-4.35 (m, CHCH<sub>2</sub>), 4.45-4.59 (m, NHCH<sub>2</sub>), 5.37-5.49 (m, NHCH), 6.82-6.84 (m, NHCH<sub>2</sub>), 7.28-7.34 (m, 3 ArH), 7.41-7.55 (m, 4 ArH), 7.69-7.70 (m, ArH); <sup>13</sup>C NMR (CDCl<sub>3</sub>) δ 28.2 (C(CH<sub>3</sub>)<sub>3</sub>), 43.0 (NHCH<sub>2</sub>), 54.1 (CH), 59.1 (OCH<sub>3</sub>), 72.0 (CH<sub>2</sub>O), 80.3 ((CH<sub>3</sub>)<sub>3</sub>C), 122.9, 125.6, 127.3, 127.9, 130.0, 130.2, 130.3, 137.8, 138.8, 142.8 (ArC), 155.5 (NHC(O)), 170.4 (C(O)); LRMS (ESI<sup>+</sup>)

463.1 [M + H]<sup>+</sup> (100%), 465.1 [M + 2 + H]<sup>+</sup> (100%); HRMS (ESI<sup>+</sup>) 463.1232 [M + H]<sup>+</sup> (calcd for C<sub>22</sub>H<sub>27</sub><sup>79</sup>BrN<sub>2</sub>O<sub>4</sub>H<sup>+</sup> 463.1234).

**Preparation of (*R*)-*N*-(3''-Iodo-4-biphenylmethyl) 2-*N*-(*tert*-Butoxycarbonyl)amino-3-**

**methoxypropionamide ((*R*)-60).** Using Method E, Ag<sub>2</sub>O (2.10 g, 9.0 mmol), MeI (2.57 g, 18.1 mmol), and (*R*)-50 (900 mg, 1.8 mmol) gave compound (*R*)-60 as a colorless sticky foam (674 mg, 73%): *R*<sub>f</sub> = 0.62 (1:20 MeOH/CH<sub>2</sub>Cl<sub>2</sub>); [α]<sub>D</sub><sup>24</sup> -12.9° (c = 1.0, CHCl<sub>3</sub>); <sup>1</sup>H NMR (CDCl<sub>3</sub>) δ 1.45 (s, (CH<sub>3</sub>)<sub>3</sub>C), 3.40 (s, OCH<sub>3</sub>), 3.53 (dd, *J* = 3.6, 9.1 Hz, CHH'OCH<sub>3</sub>), 3.87 (dd, *J* = 3.7, 9.1 Hz, CHH'OCH<sub>3</sub>), 4.28–4.32 (m, CHCH<sub>2</sub>), 4.47–4.60 (m, NHCH<sub>2</sub>), 5.40–5.44 (m, NHCH), 6.79 (t, *J* = 5.0 Hz, NHCH<sub>2</sub>), 7.17 (t, *J* = 7.8 Hz, ArH), 7.35 (d, *J* = 8.2 Hz, 2 ArH), 7.44–7.60 (m, 3 ArH), 7.65–7.71 (m, ArH), 7.92 (s, ArH); <sup>13</sup>C NMR (CDCl<sub>3</sub>) δ 28.3 (C(CH<sub>3</sub>)<sub>3</sub>), 43.1 (NHCH<sub>2</sub>), 58.1 (CH), 59.1 (OCH<sub>3</sub>), 72.0 (CH<sub>2</sub>O), 78.6 ((CH<sub>3</sub>)<sub>3</sub>C), 94.8, 126.3, 127.3, 127.9, 130.4, 136.0, 136.2, 137.7, 138.8, 142.9 (ArC), 155.3 (NHC(O)), 170.4 (C(O)); HRMS (ESI<sup>+</sup>) 511.1094 [M + H]<sup>+</sup> (calcd for C<sub>22</sub>H<sub>27</sub>IN<sub>2</sub>O<sub>4</sub>H<sup>+</sup> 511.1097).

**Preparation of (*R*)-*N*-(3''-Cyanobiphenyl-4'-yl)methyl 2-*N*-(*tert*-Butoxycarbonyl)amino-3-**

**methoxypropionamide ((*R*)-61).** Using Method E, (*R*)-51 (6.40 g, 15.9 mmol), acetonitrile (300 mL), DMF (30 mL), Ag<sub>2</sub>O (18.5 g, 79.5 mmol), and CH<sub>3</sub>I (22.50 g, 159.3 mmol) were stirred (48 h). The reaction mixture was filtered through Celite and concentrated in vacuo. The residue was diluted in CH<sub>2</sub>Cl<sub>2</sub> (200 mL) and washed with H<sub>2</sub>O (2 × 200 mL) and saturated aqueous brine (2 × 100 mL). The organic layer was dried (Na<sub>2</sub>SO<sub>4</sub>), concentrated in vacuo and then purified by SiO<sub>2</sub> column chromatography (CH<sub>2</sub>Cl<sub>2</sub>/CH<sub>3</sub>OH 20/1) and further purified by recrystallization (EtOAc/hexanes) to give the desired product (*R*)-61 (3.10 g, 48%) as a colorless oil: *R*<sub>f</sub> = 0.50 (CH<sub>2</sub>Cl<sub>2</sub>/CH<sub>3</sub>OH 20/1); [α]<sub>D</sub><sup>25</sup> +16.9° (c 1.0, CHCl<sub>3</sub>); <sup>1</sup>H NMR (CDCl<sub>3</sub>) δ 1.35 (s, (CH<sub>3</sub>)<sub>3</sub>CO), 3.27 (s,

OCH<sub>3</sub>), 3.46-3.50 (m, CHH'OCH<sub>3</sub>), 3.70-3.74 (m, CHH'OCH<sub>3</sub>), 4.20-4.50 (m, CH, CH<sub>2</sub>N), 5.59-5.65 (br s, N(H)CH), 7.17-7.30 (m, 2 ArH, N(H)CH<sub>2</sub>), 7.35-7.52 (m, 4 ArH), 7.68-7.73 (m, 2 ArH); <sup>13</sup>C NMR (CDCl<sub>3</sub>) δ 28.1 (C(CH<sub>3</sub>)<sub>3</sub>), 42.7 (NCH<sub>2</sub>), 54.1 (CH), 58.9 (OCH<sub>3</sub>), 72.2 (OCH<sub>2</sub>), 80.2 (C(CH<sub>3</sub>)<sub>3</sub>), 112.7 (ArC), 118.6 (CN), 127.0, 127.9, 128.6, 129.5, 130.5, 131.4, 137.5, 138.6, 141.7 (9 ArC), 155.5 (NHC(O)O), 170.5, (C(O)CH); LRMS (ESI<sup>+</sup>) 410.2 [M + H]<sup>+</sup> (calcd for C<sub>23</sub>H<sub>28</sub>N<sub>3</sub>O<sub>4</sub><sup>+</sup> 410.2); HRMS (ESI<sup>+</sup>) 410.2084 [M + H]<sup>+</sup> (calcd for C<sub>23</sub>H<sub>28</sub>N<sub>3</sub>O<sub>4</sub><sup>+</sup> 410.2080).

**Preparation of (R)-N-(3''-Trifluoromethyl)-4-biphenylmethyl 2-N-(tert-Butoxycarbonyl) amino-3-methoxypropionamide ((R)-62).** Using Method E, Ag<sub>2</sub>O (3.96 g, 17.1 mmol), MeI (4.85 g, 34.2 mmol), and (R)-52 (1.50 g, 3.4 mmol) gave compound (R)-62 as a colorless sticky foam (1.39 g, 90%): R<sub>f</sub> = 0.72 (1:20 MeOH/CH<sub>2</sub>Cl<sub>2</sub>); [α]<sub>D</sub><sup>22</sup> -30.9° (c = 1.0, CHCl<sub>3</sub>); <sup>1</sup>H NMR (DMSO-*d*<sub>6</sub>) δ 1.39 (s, (CH<sub>3</sub>)<sub>3</sub>C), 3.32 (s, OCH<sub>3</sub>), 3.49-3.51 (m, CHCH<sub>2</sub>), 4.15-4.25 (m, CHCH<sub>2</sub>), 4.28-4.42 (m, NHCH<sub>2</sub>), 6.86 (d, J = 8.2 Hz, NHCH), 7.38 (d, J = 8.2 Hz, 2 ArH), 7.65-7.73 (m, 4 ArH), 7.94 (s, ArH), 7.97 (d, J = 6.7 Hz, ArH), 8.48 (t, J = 6.1 Hz, NHCH<sub>2</sub>); <sup>13</sup>C NMR (DMSO-*d*<sub>6</sub>) δ 28.1 (C(CH<sub>3</sub>)<sub>3</sub>), 41.7 (NHCH<sub>2</sub>), 54.3 (OCH<sub>3</sub>), 58.1 (CH), 72.0 (CH<sub>2</sub>O), 78.2 ((CH<sub>3</sub>)<sub>3</sub>C), 122.9 (q, J = 4.0 Hz), 123.9 (q, J = 4.0 Hz), 124.2 (q, J = 272.0 Hz, CF<sub>3</sub>), 126.8, 127.7 (ArC), 129.7 (q, J = 32.0 Hz), 130.0, 130.6, 136.9, 139.5, 141.0 (ArC), 155.2 (NHC(O)), 170.1 (C(O)); LRMS (ESI<sup>+</sup>) 453.2 [M + H]<sup>+</sup> (calcd for C<sub>23</sub>H<sub>28</sub>F<sub>3</sub>N<sub>2</sub>O<sub>4</sub><sup>+</sup> 453.2); HRMS (ESI<sup>+</sup>) 453.2033 [M + H]<sup>+</sup> (calcd for C<sub>23</sub>H<sub>28</sub>F<sub>3</sub>N<sub>2</sub>O<sub>4</sub><sup>+</sup> 453.2001).

**Preparation of (R)-N-(3''-Trifluoromethoxybiphenyl-4'-yl)methyl 2-N-(tert.-Butoxycarbonyl)amino-3-methoxypropionamide ((R)-63).** Using Method E, (R)-53 (2.54 g, 5.6 mmol), Ag<sub>2</sub>O (6.48 g, 28.0 mmol), and CH<sub>3</sub>I (3.50 mL, 55.9 mmol) gave (R)-63 as a white solid (2.29 g, 88%): R<sub>f</sub> = 0.40 (hexanes/EtOAc 1/1); mp 83-84 °C; [α]<sub>D</sub><sup>26</sup> -16.5° (c 1.1, CHCl<sub>3</sub>); IR (nujol) 3166, 2913, 2842, 1662, 1527, 1459, 1375, 1254, 1161, 1051, 952, 855, 782, 646 cm<sup>-1</sup>; <sup>1</sup>H NMR

(DMSO-*d*<sub>6</sub>)  $\delta$  1.40 (s, (CH<sub>3</sub>)<sub>3</sub>), 3.27 (s, OCH<sub>3</sub>), 3.51–3.53 (m, CH<sub>2</sub>OCH<sub>3</sub>), 4.19–4.24 (m, CH), 4.30–4.41 (m, CH<sub>2</sub>N), 6.88 (d, *J* = 8.0 Hz, NHCH), 7.34–7.38 (m, 3 ArH), 7.57–7.72 (m, 5 ArH), 8.48 (t, *J* = 6.0 Hz, NHCH<sub>2</sub>); <sup>13</sup>C NMR (DMSO-*d*<sub>6</sub>)  $\delta$  28.1 ((CH<sub>3</sub>)<sub>3</sub>), 41.7 (NCH<sub>2</sub>), 54.3 (OCH<sub>2</sub>CH), 58.1 (OCH<sub>3</sub>), 72.0 (OCH<sub>2</sub>CH), 78.2 (C(CH<sub>3</sub>)<sub>3</sub>), 119.1, 119.6 (ArC), 120.1 (d, *J* = 254.9 Hz, OCF<sub>3</sub>), 125.7, 126.7, 127.7, 130.8, 136.8, 139.5, 142.3, 149.0 (ArC), 155.2 (NC(O)O), 170.1 (C(O)); LRMS (ESI<sup>+</sup>) 491.1 [M + Na]<sup>+</sup> (calcd for C<sub>23</sub>H<sub>27</sub>F<sub>3</sub>N<sub>2</sub>O<sub>5</sub>Na<sup>+</sup> 491.2); Anal. Calcd. for C<sub>23</sub>H<sub>27</sub>F<sub>3</sub>N<sub>2</sub>O<sub>5</sub>: C, 58.97; H, 5.81; F, 12.17; N, 5.98. Found: C, 59.05; H, 5.97; F, 12.06; N, 5.92.

**Preparation of (*R*)-*N*-(4''-Trifluoromethoxybiphenyl-4'-yl)methyl 2-*N*-(*tert*-**

**Butoxycarbonyl)amino-3-methoxypropionamide ((*R*)-**64**).** Using Method E, (*R*)-**54** (0.93 g, 2.1 mmol), Ag<sub>2</sub>O (2.37 g, 10.2 mmol) and CH<sub>3</sub>I (1.28 mL, 20.5 mmol) gave (*R*)-**64** as a white solid (0.88 g, 91%): *R*<sub>f</sub> = 0.40 (hexanes/EtOAc 1/1); mp 131–132 °C; [ $\alpha$ ]<sub>D</sub><sup>26</sup> –16.7° (c 0.9, CHCl<sub>3</sub>); IR (nujol) 3332, 2924, 2858, 2657, 1532, 1458, 1378, 1260, 1151, 1047, 953, 839, 677 cm<sup>-1</sup>; <sup>1</sup>H NMR (CDCl<sub>3</sub>)  $\delta$  1.44 (s, (CH<sub>3</sub>)<sub>3</sub>), 3.39 (s, OCH<sub>3</sub>), 3.52 (dd, *J* = 6.0, 9.2 Hz, CHH'OCH<sub>3</sub>), 3.92 (dd, *J* = 4.0, 9.2 Hz, CHH'OCH<sub>3</sub>), 4.25–4.32 (br m, CH), 4.48–4.58 (br m, CH<sub>2</sub>N), 5.36–5.44 (br d, NHCH), 6.76–6.81 (m, NHCH<sub>2</sub>), 7.28 (d, *J* = 8.0 Hz, 2 ArH), 7.35 (d, *J* = 8.4 Hz, 2 ArH), 7.50–7.59 (m, 4 ArH); <sup>13</sup>C NMR (DMSO-*d*<sub>6</sub>)  $\delta$  28.1 ((CH<sub>3</sub>)<sub>3</sub>), 41.7 (NCH<sub>2</sub>), 54.3 (OCH<sub>2</sub>CH), 58.1 (OCH<sub>3</sub>), 72.0 (OCH<sub>2</sub>CH), 78.2 (C(CH<sub>3</sub>)<sub>3</sub>), 120.1 (d, *J* = 254.9 Hz, OCF<sub>3</sub>), 121.4, 126.6, 127.6, 128.4, 137.2, 139.1, 139.3, 147.7 (ArC), 155.2 (NC(O)O), 170.1 (C(O)); LRMS (ESI<sup>+</sup>) 601.1 [M + Cs]<sup>+</sup> (calcd for C<sub>23</sub>H<sub>27</sub>F<sub>3</sub>N<sub>2</sub>O<sub>5</sub>Cs<sup>+</sup> 601.1); Anal. Calcd. for C<sub>23</sub>H<sub>27</sub>F<sub>3</sub>N<sub>2</sub>O<sub>5</sub>: C, 58.97; H, 5.81; F, 12.17; N, 5.98. Found: C, 58.92; H, 5.93; F, 11.98; N, 5.95.

**Preparation of (*R*)-*N*-(3''-Acetylamino-biphenyl-4'-yl)methyl 2-*N*-(*tert*-Butoxycarbonyl)amino-3-methoxypropionamide ((*R*)-**65**).** Using Method E and the workup conditions for (*R*)-**61**, (*R*)-**55** (4.00 g, 9.36 mmol), acetonitrile (200 mL), DMF (10 mL), Ag<sub>2</sub>O (10.80 g, 46.8 mmol), and CH<sub>3</sub>I (13.28 g, 93.6 mmol) gave the desired product (*R*)-**65** (1.80 g, 44%) as a colorless oil: *R*<sub>f</sub> = 0.28 (CH<sub>2</sub>Cl<sub>2</sub>/CH<sub>3</sub>OH 20/1); [α]<sup>25</sup><sub>D</sub> +21.9 ° (c 1.0, CHCl<sub>3</sub>); <sup>1</sup>H NMR (CDCl<sub>3</sub>) δ 1.43 (s, (CH<sub>3</sub>)<sub>3</sub>CO), 2.19 (s, CH<sub>3</sub>CO), 3.38 (s, OCH<sub>3</sub>), 3.48-3.54 (m, CHH'OCH<sub>3</sub>), 3.80-3.87 (m, CHH'OCH<sub>3</sub>), 4.23-4.29 (br s, CH), 4.47-4.54 (br s, CH<sub>2</sub>N), 5.40-5.44 (br s, N(H)CH), 6.77-6.81 (br s, N(H)CH<sub>2</sub>), 7.24-7.38 (m, 4 ArH), 7.42-7.54 (m, 3 ArH, ArNHC(O)), 7.71 (s, ArH), addition of excess (*R*)-(-)-mandelic acid to a CDCl<sub>3</sub> solution of the product gave only one signal for the ether methyl protons; <sup>13</sup>C NMR (CDCl<sub>3</sub>) δ 24.9 (CH<sub>3</sub>CO), 28.5 (C(CH<sub>3</sub>)<sub>3</sub>), 43.4 (NCH<sub>2</sub>), 54.3 (CH), 59.3 (OCH<sub>3</sub>), 72.3 (OCH<sub>2</sub>), 118.7, 119.0, 123.2, 127.6, 128.1, 129.6, 137.5, 138.6, 140.1, 141.8, (10 ArC), 155.8 (NHC(O)O), 168.6, 170.6 (2 C(O)), the *t*-butyl carbon resonance was not detected and is believed to be overlap with the nearby solvent resonance; LRMS (ESI<sup>+</sup>) 442.2 [M + H]<sup>+</sup> (calcd for C<sub>24</sub>H<sub>32</sub>N<sub>3</sub>O<sub>5</sub><sup>+</sup> 442.2); HRMS (ESI<sup>+</sup>) 442.2345 [M + H]<sup>+</sup> (calcd for C<sub>24</sub>H<sub>32</sub>N<sub>3</sub>O<sub>5</sub><sup>+</sup> 442.2342).

**Preparation of (*R*)-*N*-(3''-*tert*-Butoxymethylbiphenyl-4'-yl)methyl 2-Acetamido-3-methoxypropionamide ((*R*)-**73**).** Using Method E and the workup conditions for (*R*)-**61**, (*R*)-**71** (1.03 g, 2.6 mmol), acetonitrile (30 mL), DMF (3 mL), Ag<sub>2</sub>O (2.99 g, 12.9 mmol), CH<sub>3</sub>I (3.67 g, 25.8 mmol) gave the desired product (*R*)-**73** (0.65 g, 61%) as a white solid: *R*<sub>f</sub> = 0.31 (EtOAc/hexanes 1/1); mp 139-140 °C; [α]<sup>23</sup><sub>D</sub> - 21.7 ° (c 1.0, CHCl<sub>3</sub>); <sup>1</sup>H NMR (CDCl<sub>3</sub>) δ 1.31 (s, (CH<sub>3</sub>)<sub>3</sub>CO), 2.01 (CH<sub>3</sub>C(O)), 3.37 (s, OCH<sub>3</sub>), 3.46-3.51 (m, CHH'OCH<sub>3</sub>), 3.76-3.80 (m, CHH'OCH<sub>3</sub>), 4.45-4.55 (m, ArCH<sub>2</sub>O, CH<sub>2</sub>N), 4.60-4.64 (m, CH), 6.72-6.74 (br d, N(H)CH), 7.08-7.12 (br t, N(H)CH<sub>2</sub>), 7.29-7.50 (m, 5 ArH), 7.52-7.57 (m, 3 ArH), addition of excess (*R*)-(-)-mandelic acid to

a CDCl<sub>3</sub> solution of (*R*)-**73** gave only one signal for the acetyl methyl and one signal for the ether methyl protons; <sup>13</sup>C NMR (CDCl<sub>3</sub>) δ 23.3 (CH<sub>3</sub>C(O)), 27.9 (C(CH<sub>3</sub>)<sub>3</sub>), 43.4 (NCH<sub>2</sub>), 52.8 (CH), 59.3 (OCH<sub>3</sub>), 64.3 (ArCH<sub>2</sub>O), 72.0 (OCH<sub>2</sub>), 73.9 (C(CH<sub>3</sub>)<sub>3</sub>), 126.1, 126.3, 126.7, 127.6, 128.0, 128.9, 137.0, 140.6, 140.7, 140.8 (10 ArC), 170.2, 170.7 (2 C(O)NH); LRMS (ESI<sup>+</sup>) 413.2 [M + H]<sup>+</sup> (calcd for C<sub>24</sub>H<sub>32</sub>N<sub>2</sub>O<sub>4</sub>H<sup>+</sup> 413.2); HRMS (ESI<sup>+</sup>) 413.2442 [M + H]<sup>+</sup> (calcd for C<sub>24</sub>H<sub>32</sub>N<sub>2</sub>O<sub>4</sub>H<sup>+</sup> 413.2440).

**Preparation of (*R*)-*N*-(3''-tert.-Butoxycarbonylbiphenyl-4'-yl)methyl 2-Acetamido-3-methoxypropionamide ((*R*)-**74**).** Using Method E and the workup conditions for (*R*)-**61**, (*R*)-**72** (0.90 g, 2.2 mmol), acetonitrile (50 mL), DMF (5 mL), Ag<sub>2</sub>O (2.53 g, 10.9 mmol), and CH<sub>3</sub>I (3.10 g, 21.8 mmol) gave the desired product (*R*)-**74** (0.31 g, 33%) as a white solid: R<sub>f</sub> = 0.39 (EtOAc/hexanes 1/1); mp 166-168 °C; [α]<sub>D</sub><sup>22.5</sup> +11.8 ° (c 1.0, CH<sub>3</sub>OH); <sup>1</sup>H NMR (CDCl<sub>3</sub>) δ 1.61 (s, (CH<sub>3</sub>)<sub>3</sub>CO), 2.05 (s, CH<sub>3</sub>C(O)), 3.39 (s, OCH<sub>3</sub>), 3.45-3.50 (m, CHH'OCH<sub>3</sub>), 3.80-3.84 (m, CHH'OCH<sub>3</sub>), 4.51-4.54 (m, CH<sub>2</sub>N), 4.55-4.61 (br s, CH), 6.54-6.58 (br s, N(H)CH), 6.91-6.95 (br s, N(H)CH<sub>2</sub>), 7.35 (d, J = 7.8 Hz, 2 ArH), 7.47-7.49 (br t, ArH), 7.57-7.59 (d, J = 7.8 Hz, 2 ArH), 7.72-7.74 (m, ArH), 7.95-7.77 (m, ArH), 8.19 (s, ArH), addition of excess (*R*)-(-)-mandelic acid to a CDCl<sub>3</sub> solution of (*R*)-**73** gave only one signal for the acetyl methyl and one signal for the ether methyl protons; <sup>13</sup>C NMR (CDCl<sub>3</sub>) δ 23.4 (CH<sub>3</sub>C(O)), 28.4 (C(CH<sub>3</sub>)<sub>3</sub>), 43.5 (NCH<sub>2</sub>), 52.8 (CH), 59.4 (OCH<sub>3</sub>), 71.8 (OCH<sub>2</sub>), 81.4 (C(CH<sub>3</sub>)<sub>3</sub>), 127.7, 128.2, 128.3, 128.5, 128.9, 131.2, 132.8, 137.5, 139.8, 141.0 (10 ArC), 165.9 (ArC(O)O), 170.3, 170.7 (2 C(O)NH); LRMS (ESI<sup>+</sup>) 427.2 [M + H]<sup>+</sup> (calcd for C<sub>24</sub>H<sub>30</sub>N<sub>2</sub>O<sub>5</sub>H<sup>+</sup> 427.2); HRMS (ESI<sup>+</sup>) 427.2237 [M + H]<sup>+</sup> (calcd for C<sub>24</sub>H<sub>30</sub>N<sub>2</sub>O<sub>5</sub>H<sup>+</sup> 427.2233).

**Preparation of (*R*)-*N*-(3''-tert.-Butoxycarbonylaminobiphenyl-4'-yl)methyl 2-Acetamido-3-methoxypropionamide ((*R*)-**75**).**<sup>1</sup> To a cooled THF solution (-78 °C, dry ice acetone bath) of (*R*)-



**70**<sup>2</sup> (0.18 g, 1.1 mmol) were successively added *N*-methylmorpholine (NMM) (0.18 mL, 1.6 mmol), stirred for 2 min, isobutylchloroformate (IBCF) (0.18 mL, 1.4 mmol), stirred for 5 min, and then **39** (0.39 g, 1.3 mmol, prepared by Method C from **39·HCl**). Upon addition the reaction mixture was allowed to warm to room temperature and further stirred (2–3 h). The salts were filtered and rinsed with THF and the filtrate was concentrated in vacuo. The residue obtained was purified by column chromatography on SiO<sub>2</sub> to give (*R*)-**75** as a white solid (0.34 g, 70%): *R<sub>f</sub>* = 0.45 (MeOH/CHCl<sub>3</sub> 1/15); mp 187–188 °C; [α]<sub>D</sub><sup>26</sup> –12.7° (c 1.1, CHCl<sub>3</sub>); <sup>1</sup>H NMR (CDCl<sub>3</sub>) δ 1.53 (s, (CH<sub>3</sub>)<sub>3</sub>), 2.04 (s, C(O)CH<sub>3</sub>), 3.40 (s, OCH<sub>3</sub>), 3.45 (dd, *J* = 7.6, 9.2 Hz, CHH'OCH<sub>3</sub>), 3.82 (dd, *J* = 4.0, 9.2 Hz, CHH'OCH<sub>3</sub>), 4.45–4.58 (m, CH<sub>2</sub>N, CH), 6.44 (d, *J* = 6.4, NHCH), 6.55 (s, NH-*t*Boc), 6.76–6.79 (br t, NHCH<sub>2</sub>), 7.23 (d, *J* = 8.6 Hz, 2 ArH), 7.42 (d, *J* = 8.6 Hz, 2 ArH), 7.49–7.53 (m, 4 ArH); <sup>13</sup>C NMR (DMSO-*d*<sub>6</sub>) δ 22.5 (C(O)CH<sub>3</sub>), 28.1 ((CH<sub>3</sub>)<sub>3</sub>), 41.7 (NCH<sub>2</sub>), 52.6 (OCH<sub>3</sub>), 58.2 (OCH<sub>2</sub>CH), 72.1 (OCH<sub>2</sub>CH), 79.1 (C(CH<sub>3</sub>)<sub>3</sub>), 118.4, 125.9, 126.7, 127.5, 133.5, 137.9, 138.2, 138.9 (ArC), 152.7 (NC(O)O), 169.5, 169.8 (2 C(O)); HRMS (ESI<sup>+</sup>) 574.1320 [M + Cs]<sup>+</sup> (calcd for C<sub>24</sub>H<sub>31</sub>N<sub>3</sub>O<sub>5</sub>Cs<sup>+</sup> 574.1318).

#### **Preparation of (*R*)-*N*-(4''-Fluorobiphenyl-4'-yl)methyl 2-Acetamido-3-methoxypropionamide**

**((*R*)-4)**. Using Method F, (*R*)-**56** (3.17 g, 7.9 mmol) and 4 M HCl (6.90 mL, 27.6 mmol), followed by Et<sub>3</sub>N (2.42 mL, 17.3 mmol) and AcCl (0.61 mL, 8.7 mmol) gave (*R*)-**4** as a white solid (2.50 g, 92%): *R<sub>f</sub>* = 0.40 (MeOH/CH<sub>2</sub>Cl<sub>2</sub> 1/20); mp 189–190 °C; [α]<sub>D</sub><sup>26</sup> –17.8° (c 1.0, CHCl<sub>3</sub>); IR (nujol) 3295, 2922, 2860, 1634, 1550, 1460, 1372, 1314, 1222, 1101, 916, 823, 690 cm<sup>-1</sup>; <sup>1</sup>H NMR (CDCl<sub>3</sub>) δ 2.04 (s, C(O)CH<sub>3</sub>), 3.40 (s, OCH<sub>3</sub>), 3.44–3.48 (m, CHH'OCH<sub>3</sub>), 3.83 (dd, *J* = 3.9, 9.0 Hz, CHH'OCH<sub>3</sub>), 4.45–4.59 (m, CH<sub>2</sub>N, CH), 6.43–5.46 (br d, NHCH), 6.81–6.85 (m, NHCH<sub>2</sub>), 7.12 (t, *J* = 8.6 Hz, 2 ArH), 7.32 (d, *J* = 7.6 Hz, 2 ArH), 7.49–7.54 (m, 4 ArH), addition of excess (*R*)-(-)-mandelic acid to

a CDCl<sub>3</sub> solution of (*R*)-**4** gave only one signal for the acetyl methyl and one signal for the ether methyl protons; <sup>13</sup>C NMR (DMSO-*d*<sub>6</sub>) δ 22.6 (C(O)CH<sub>3</sub>), 41.8 (NCH<sub>2</sub>), 52.7 (OCH<sub>2</sub>CH), 58.2 (OCH<sub>3</sub>), 72.1 (OCH<sub>2</sub>CH), 115.7 (d, *J* = 21.3 Hz, C<sub>3''</sub>, C<sub>5''</sub>), 126.5 (ArC), 127.6 (ArC), 128.5 (d, *J* = 8.0 Hz, C<sub>2''</sub>, C<sub>6''</sub>), 136.4 (d, *J* = 2.9 Hz, C<sub>1''</sub>), 137.6 (ArC), 138.6 (ArC), 161.8 (d, *J* = 242.4 Hz, C<sub>4''</sub>), 169.5, 169.8 (2 C(O)); LRMS (ESI<sup>+</sup>) 367.1 [M + Na]<sup>+</sup> (calcd for C<sub>19</sub>H<sub>21</sub>FN<sub>2</sub>O<sub>3</sub>Na<sup>+</sup> 367.1); Anal. Calcd. for C<sub>19</sub>H<sub>21</sub>FN<sub>2</sub>O<sub>3</sub>: C, 66.26; H, 6.15; F, 5.52; N, 8.13. Found: C, 65.97; H, 6.18; F, 5.35; N, 8.11.

**Preparation of (*R*)-*N*-(3''-Chlorobiphenyl-4'-yl)methyl 2-Acetamido-3-methoxypropionamide**

**((*R*)-**5**).** Using Method F, (*R*)-**57** (4.00 g, 9.6 mmol) and 4 M HCl (8.36 mL, 33.4 mmol), followed by Et<sub>3</sub>N (2.93 mL, 21.0 mmol) and AcCl (0.74 mL, 10.5 mmol) gave (*R*)-**5** as a white solid (2.85 g, 83%); *R<sub>f</sub>* = 0.40 (MeOH/CH<sub>2</sub>Cl<sub>2</sub> 1/20); mp 172-173 °C; [α]<sub>D</sub><sup>26</sup> -15.8° (*c* 1.1, CHCl<sub>3</sub>); IR (nujol) 3286, 3071, 2950, 2879, 1637, 1549, 1458, 1383, 1307, 1247, 1132, 784, 717, 609 cm<sup>-1</sup>; <sup>1</sup>H NMR (CDCl<sub>3</sub>) δ 2.00 (s, C(O)CH<sub>3</sub>), 3.37 (s, OCH<sub>3</sub>), 3.49 (dd, *J* = 7.0, 9.0 Hz, CHH'OCH<sub>3</sub>), 3.78 (dd, *J* = 4.0, 9.0 Hz, CHH'OCH<sub>3</sub>), 4.43 (1/2HH'<sub>q</sub>, *J* = 5.8, 15.0 Hz, CHH'Ar), 4.49 (1/2HH'<sub>q</sub>, *J* = 5.8, 15.0 Hz, CHH'Ar), 4.62–4.67 (m, CH), 6.71 (d, *J* = 6.8 Hz, NHCH), 7.15–7.18 (m, NHCH<sub>2</sub>), 7.30–7.52 (m, 8 ArH), addition of excess (*R*)-(-)-mandelic acid to a CDCl<sub>3</sub> solution of (*R*)-**5** gave only one signal for the acetyl methyl and one signal for the ether methyl protons; <sup>13</sup>C NMR (CDCl<sub>3</sub>) δ 23.3 (C(O)CH<sub>3</sub>), 43.3 (NCH<sub>2</sub>), 52.7 (OCH<sub>2</sub>CH), 59.2 (OCH<sub>3</sub>), 72.1 (OCH<sub>2</sub>CH), 125.3, 127.3, 127.5, 128.1, 130.2, 134.8, 137.9, 139.1, 142.6 (ArC), 170.3, 170.6 (2 C(O)), the remaining aromatic peak was not detected and is believed to overlap with the observed signals; LRMS (ESI<sup>+</sup>) 383.1 [M + Na]<sup>+</sup> (calcd for C<sub>19</sub>H<sub>21</sub>ClN<sub>2</sub>O<sub>3</sub>Na<sup>+</sup> 383.1); Anal. Calcd. for C<sub>19</sub>H<sub>21</sub>ClN<sub>2</sub>O<sub>3</sub>: C, 63.24; H, 5.87; Cl, 9.83; N, 7.76. Found: C, 63.29; H, 6.01; Cl, 9.71; N, 7.77.

### Preparation of (*R*)-*N*-(4''-Chlorobiphenyl-4'-yl)methyl 2-Acetamido-3-methoxypropionamide

**((*R*)-6).** Using Method F, (*R*)-58 (2.80 g, 6.7 mmol) and 4 M HCl (6.70 mL, 26.7 mmol), followed by Et<sub>3</sub>N (2.10 mL, 14.7 mmol) and AcCl (0.52 mL, 7.4 mmol) gave (*R*)-6 as a white solid (1.83 g, 76%): *R<sub>f</sub>* = 0.40 (MeOH/CH<sub>2</sub>Cl<sub>2</sub> 1/20); mp 215-216 °C; [ $\alpha$ ]<sub>D</sub><sup>26</sup> -16.9° (*c* 1.1, CHCl<sub>3</sub>); IR (nujol) 3288, 2926, 2858, 1634, 1544, 1459, 1375, 1311, 1198, 1102, 918, 811, 740 cm<sup>-1</sup>; <sup>1</sup>H NMR (CDCl<sub>3</sub>)  $\delta$  2.03 (s, C(O)CH<sub>3</sub>), 3.39 (s, OCH<sub>3</sub>), 3.44–3.48 (m, CHH'OCH<sub>3</sub>), 3.82 (dd, *J* = 4.0, 9.2 Hz, CHH'OCH<sub>3</sub>), 4.45–4.61 (m, CH<sub>2</sub>N, CH), 6.45–6.49 (br d, NHCH), 6.86–6.91(m, NHCH<sub>2</sub>), 7.32 (d, *J* = 8.0 Hz, 2 ArH), 7.39 (d, *J* = 8.4 Hz, 2 ArH), 7.48–7.52 (m, 4 ArH), addition of excess (*R*)-(-)-mandelic acid to a CDCl<sub>3</sub> solution of (*R*)-6 gave only one signal for the acetyl methyl and one signal for the ether methyl protons; <sup>13</sup>C NMR (CDCl<sub>3</sub>)  $\delta$  23.4 (C(O)CH<sub>3</sub>), 43.4 (NCH<sub>2</sub>), 52.7 (OCH<sub>2</sub>CH), 59.3 (OCH<sub>3</sub>), 71.9 (OCH<sub>2</sub>CH), 127.5, 128.2, 128.5, 129.2, 133.7, 137.5, 139.3, 139.4 (ArC), 170.3, 170.5 (2 C(O)); LRMS (ESI<sup>+</sup>) 361.2 [M + H]<sup>+</sup> (calcd for C<sub>19</sub>H<sub>21</sub>ClN<sub>2</sub>O<sub>3</sub>H<sup>+</sup> 361.2); Anal. Calcd. for C<sub>19</sub>H<sub>21</sub>ClN<sub>2</sub>O<sub>3</sub>: C, 63.24; H, 5.87; Cl, 9.83; N, 7.76. Found: C, 63.00; H, 6.02; Cl, 9.58; N, 7.69.

### Preparation of (*R*)-*N*-(3''-Bromo-4-biphenylmethyl) 2-Acetamido-3-methoxypropionamide

**((*R*)-7).** Using Method F, 4 M HCl in dioxane (3.5 mL), (*R*)-59, (1.30 g, 2.8 mmol), Et<sub>3</sub>N (862 mg, 8.5 mmol), and AcCl (268 mg, 3.4 mmol) gave compound (*R*)-7 as a white solid (620 mg, 54%): *R<sub>f</sub>* = 0.44 (1:20 MeOH/CH<sub>2</sub>Cl<sub>2</sub>); mp 171–173 °C; [ $\alpha$ ]<sub>D</sub><sup>26</sup> -17.3° (*c* 1.0, CHCl<sub>3</sub>); <sup>1</sup>H NMR (CDCl<sub>3</sub>)  $\delta$  2.00 (s, (CH<sub>3</sub>C(O))), 3.37 (s, OCH<sub>3</sub>), 3.45–3.49 (m, CHH'OCH<sub>3</sub>), 3.79 (dd, *J* = 4.0, 9.0 Hz, CHH'OCH<sub>3</sub>), 4.40–4.55 (m, NHCH<sub>2</sub>), 4.56–4.66 (m, CHCH<sub>2</sub>), 6.60 (d, *J* = 6.4 Hz, NHCH), 6.98–7.08 (br s, NHCH<sub>2</sub>), 7.24–7.35 (m, 3 ArH), 7.39–7.56 (m, 4 ArH), 7.68 (s, ArH), addition of excess (*R*)-(-)-mandelic acid to a CDCl<sub>3</sub> solution of (*R*)-7 gave only one signal for the acetyl methyl and one signal for the ether methyl protons; <sup>13</sup>C NMR (CDCl<sub>3</sub>)  $\delta$  23.1 (C(O)CH<sub>3</sub>), 43.1 (NHCH<sub>2</sub>), 52.5

(CHCH<sub>2</sub>), 59.1 (OCH<sub>3</sub>), 71.8 (CHCH<sub>2</sub>), 122.9, 125.6, 127.3, 127.9, 130.0, 130.2, 130.3, 137.6, 138.8, 142.7 (ArC), 170.1, 170.3 (2 C(O)); LRMS (ESI<sup>+</sup>) 405.0 [M + H]<sup>+</sup> (100%), 407.0 [M + 2 + H]<sup>+</sup> (100%); HRMS (ESI<sup>+</sup>) 405.0814 [M + H]<sup>+</sup> (calcd for C<sub>19</sub>H<sub>21</sub><sup>79</sup>BrN<sub>2</sub>O<sub>3</sub>H<sup>+</sup> 405.0814). Anal. Calcd. for C<sub>19</sub>H<sub>21</sub>BrN<sub>2</sub>O<sub>3</sub>: C, 56.31; H, 5.22; Br, 19.72; N, 6.91. Found: C, 56.58; H, 5.14; Br, 19.45; N, 6.90.

**Preparation of (R)-N-(3''-Iodo-4-biphenylmethyl) 2-Acetamido-3-methoxypropionamide ((R)-8).** Using Method F, 4 M HCl in dioxane (2.0 mL), (R)-60, (670 mg, 1.3 mmol), Et<sub>3</sub>N (515 mg, 3.9 mmol), and AcCl (123 mg, 1.6 mmol) gave compound (R)-8 as a white solid (515 mg, 87%): R<sub>f</sub> = 0.41 (1:20 MeOH/CH<sub>2</sub>Cl<sub>2</sub>); mp 161–163 °C; [α]<sub>D</sub><sup>26</sup> -11.0° (c 1.0, CHCl<sub>3</sub>); <sup>1</sup>H NMR (CDCl<sub>3</sub>) δ 2.05 (s, CH<sub>3</sub>C(O)), 3.41 (s, OCH<sub>3</sub>), 3.43–3.50 (m, CHH'OCH<sub>3</sub>), 3.84 (dd, J = 4.3, 9.3 Hz, CHH'OCH<sub>3</sub>), 4.46–4.55 (m, NHCH<sub>2</sub>), 4.57–4.60 (m, CHCH<sub>2</sub>), 6.45 (d, J = 6.8 Hz, NHCH), 6.83 (t, J = 4.8 Hz, NHCH<sub>2</sub>), 7.17 (t, J = 7.8 Hz, ArH), 7.34 (d, J = 8.2 Hz, 2 ArH), 7.48–7.55 (m, 3 ArH), 7.68 (d, J = 7.8 Hz, ArH), 7.92 (s, ArH), addition of excess (R)-(-)-mandelic acid to a CDCl<sub>3</sub> solution of (R)-8 gave only one signal for the acetyl methyl and one signal for the ether methyl protons; <sup>13</sup>C NMR (CDCl<sub>3</sub>) δ 23.2 (C(O)CH<sub>3</sub>), 43.2 (NHCH<sub>2</sub>), 52.4 (CHCH<sub>2</sub>), 59.1 (OCH<sub>3</sub>), 71.6 (CHCH<sub>2</sub>), 94.8, 126.3, 127.4, 127.9, 130.4, 136.0, 136.2, 137.6, 138.9, 142.9 (ArC), 170.0, 170.3 (2 C(O)); HRMS (ESI<sup>+</sup>) 453.0675 [M + H]<sup>+</sup> (calcd for C<sub>19</sub>H<sub>21</sub>IN<sub>2</sub>O<sub>3</sub>H<sup>+</sup> 453.0673). Anal. Calcd. for C<sub>19</sub>H<sub>21</sub>IN<sub>2</sub>O<sub>3</sub>: C, 50.46; H, 4.68; I, 28.06; N, 6.19. Found: C, 50.42; H, 4.64; I, 27.76; N, 6.19.

**Preparation of (R)-N-(3''-Cyanobiphenyl-4'-yl)methyl 2-Acetamido-3-methoxypropionamide ((R)-9).** Using Method F, (R)-61 (3.10 g, 7.6 mmol) and 4 M HCl (9.5 mL, 38.0 mmol), followed by Et<sub>3</sub>N (2.30 g, 22.7 mmol) and AcCl (0.71 g, 9.1 mmol) gave the desired product (R)-9 (2.00 g, 75%) as a white solid: R<sub>f</sub> = 0.42 (CH<sub>2</sub>Cl<sub>2</sub>/CH<sub>3</sub>OH 19/1); mp 122–123 °C; [α]<sub>D</sub><sup>24.5</sup> -16.0° (c 1.0, CHCl<sub>3</sub>); <sup>1</sup>H NMR (CDCl<sub>3</sub>) δ 2.03 (s, CH<sub>3</sub>C(O)), 3.40 (s, OCH<sub>3</sub>), 3.47–3.52 (m, CHH'OCH<sub>3</sub>), 3.79–3.84

(m, CHH'OCH<sub>3</sub>), 4.48-4.54 (m, CH<sub>2</sub>N), 4.59-4.63 (m, CH), 6.56-6.59 (br d, NHCH<sub>2</sub>), 7.03-7.07 (br t, NHC(O)), 7.36 (d, *J* = 8.4 Hz, 2 ArH), 7.48-7.64 (m, 4 ArH), 7.76-7.82 (m, 2 ArH), addition of excess (*R*)-(-)-mandelic acid to a CDCl<sub>3</sub> solution of (*R*)-**9** gave only one signal for the acetyl methyl and one signal for the ether methyl protons; <sup>13</sup>C NMR (CDCl<sub>3</sub>) δ 23.4 (CH<sub>3</sub>CO), 43.3 (NCH<sub>2</sub>), 52.7 (CH), 59.3 (OCH<sub>3</sub>), 71.9 (OCH<sub>2</sub>), 113.2 (ArC), 119.0 (CN), 127.5, 128.3, 129.8, 130.8, 130.9, 131.6, 138.2, 138.5, 142.9 (9 ArC), 170.4, 170.6 (2 C(O)); LRMS (ESI<sup>+</sup>) 352.2 [M + H]<sup>+</sup> (calcd for C<sub>20</sub>H<sub>22</sub>N<sub>3</sub>O<sub>3</sub><sup>+</sup> 352.2); HRMS (ESI<sup>+</sup>) 352.1660 [M + H]<sup>+</sup> (calcd for C<sub>20</sub>H<sub>22</sub>N<sub>3</sub>O<sub>3</sub><sup>+</sup> 352.1661); Anal. Calcd. for C<sub>20</sub>H<sub>21</sub>N<sub>3</sub>O<sub>3</sub>: C, 68.36; H, 6.02; N, 11.96. Found: C, 68.06; H, 6.04; N, 11.76.

#### **Preparation of (*R*)-*N*-(3''-Trifluoromethyl)-4-biphenylmethyl 2-Acetamido-3-**

**methoxypropionamide ((*R*)-**10**).** Using Method F, (*R*)-**62**, (1.34 g, 3.0 mmol), Et<sub>3</sub>N (896 mg, 8.9 mmol), 4 M HCl in dioxane (3.0 mL, 12.0 mmol), and AcCl (348 g, 4.4 mmol) gave compound (*R*)-**10** as a white solid (1.02 g, 88%): *R<sub>f</sub>* = 0.42 (1:20 MeOH/CH<sub>2</sub>Cl<sub>2</sub>); mp 161–162 °C; [α]<sup>24</sup><sub>D</sub> –13.7° (*c* 1.0, CHCl<sub>3</sub>); <sup>1</sup>H NMR (CDCl<sub>3</sub>) δ 2.03 (s, CH<sub>3</sub>C(O)), 3.40 (s, OCH<sub>3</sub>), 3.49 (dd, *J* = 4.3, 9.3 Hz, CHH'OCH<sub>3</sub>), 3.81 (dd, *J* = 4.3, 9.3 Hz, CHH'OCH<sub>3</sub>), 4.45–4.58 (m, NHCH<sub>2</sub>) 4.61–4.64 (m, CHCH<sub>2</sub>), 6.58 (d, *J* = 7.0 Hz, NHCH), 7.04 (t, *J* = 5.3 Hz, NHCH<sub>2</sub>), 7.36 (d, *J* = 8.2 Hz, 2 ArH), 7.51–7.62 (m, 4 ArH), 7.73 (d, *J* = 7.4 Hz, ArH), 7.80 (s, ArH), addition of excess (*R*)-(-)-mandelic acid to a CDCl<sub>3</sub> solution of (*R*)-**10** gave only one signal for the acetyl methyl and one signal for the ether methyl protons; <sup>13</sup>C NMR (CDCl<sub>3</sub>) δ 23.1 (C(O)CH<sub>3</sub>), 43.1 (NHCH<sub>2</sub>), 52.5 (CHCH<sub>2</sub>), 59.1 (OCH<sub>3</sub>), 71.7 (CHCH<sub>2</sub>), 123.7 (q, *J* = 4.0 Hz), 124.0 (q, *J* = 4.0 Hz), 124.1 (q, *J* = 272.0 Hz, CF<sub>3</sub>), 127.4, 126.0, 129.2, 130.2 (ArC), 131.2 (q, *J* = 32.0 Hz), 137.9, 138.9, 141.4 (ArC), 170.1, 170.4 (2 C(O)); MS (ESI<sup>+</sup>) 395.2 [M + H]<sup>+</sup> (calcd for C<sub>20</sub>H<sub>22</sub>F<sub>3</sub>N<sub>2</sub>O<sub>3</sub><sup>+</sup> 395.2); HRMS (ESI<sup>+</sup>) 395.1583 [M + H]<sup>+</sup> (calcd for

$C_{20}H_{22}F_3N_2O_3^+$  395.1582); Anal. Calcd. for  $C_{20}H_{21}F_3N_2O_3$ : C, 60.91; H, 5.37; F, 14.45; N, 7.10.

Found: C, 61.02; H, 5.33; F, 14.41; N, 7.17.

**Preparation of (*R*)-*N*-(3''-Trifluoromethoxybiphenyl-4'-yl)methyl 2-Acetamido-3-**

**methoxypropionamide ((*R*)-11).** Using Method F, (*R*)-63 (2.14 g, 4.6 mmol) and 4 M HCl (4.00 mL, 16.0 mmol), followed by  $Et_3N$  (1.40 mL, 10.1 mmol) and AcCl (0.36 mL, 5.0 mmol) gave (*R*)-11 as a white solid (1.69 g, 90%):  $R_f = 0.40$  (MeOH/ $CH_2Cl_2$  1/20); mp 139-140 °C;  $[\alpha]_D^{26} -13.5^\circ$  (c 1.3,  $CHCl_3$ ); IR (nujol) 3274, 3071, 2951, 2857, 1639, 1557, 1458, 1378, 1291, 1153, 1048, 975, 785, 720, 604  $cm^{-1}$ ;  $^1H$  NMR ( $CDCl_3$ )  $\delta$  2.03 (s, C(O)CH<sub>3</sub>), 3.40 (s, OCH<sub>3</sub>), 3.47 (dd,  $J = 7.4, 9.2$  Hz, CHH'OCH<sub>3</sub>), 3.82 (dd,  $J = 4.0, 9.2$  Hz, CHH'OCH<sub>3</sub>), 4.46–4.61 (m, CH<sub>2</sub>N, CH), 6.49 (d,  $J = 6.4$  Hz, NHCH), 6.89–6.93 (m, NHCH<sub>2</sub>), 7.18–7.21 (m, 1 ArH), 7.33–7.54 (m, 7 ArH), addition of excess (*R*)-(-)-mandelic acid to a  $CDCl_3$  solution of (*R*)-11 gave only one signal for the acetyl methyl and one signal for the ether methyl protons;  $^{13}C$  NMR ( $DMSO-d_6$ )  $\delta$  22.5 (C(O)CH<sub>3</sub>), 41.7 (NCH<sub>2</sub>), 52.7 (OCH<sub>2</sub>CH), 58.2 (OCH<sub>3</sub>), 72.1 (OCH<sub>2</sub>CH), 119.1, 119.6 (ArC), 120.1 (q,  $J = 254.9$  Hz, OCF<sub>3</sub>), 125.7, 126.7, 127.7, 130.8, 136.8, 139.5, 142.3, 149.0 (ArC), 169.4, 169.8 (2 C(O)); LRMS (ESI<sup>+</sup>) 433.1 [M + Na]<sup>+</sup> (calcd for  $C_{20}H_{21}F_3N_2O_4Na^+$  433.1); Anal. Calcd. for  $C_{20}H_{21}F_3N_2O_4$ : C, 58.53; H, 5.16; F, 13.89; N, 6.83. Found: C, 58.56; H, 5.28; F, 13.81; N, 6.80.

**Preparation of (*R*)-*N*-(4''-Trifluoromethoxybiphenyl-4'-yl)methyl 2-Acetamido-3-**

**methoxypropionamide ((*R*)-12).** Using Method F, (*R*)-64 (0.81 g, 1.7 mmol) and 4 M HCl (1.49 mL, 6.0 mmol), followed by  $Et_3N$  (0.53 mL, 3.8 mmol) and AcCl (0.13 mL, 1.9 mmol) gave (*R*)-12 as a white solid (0.59 g, 84%):  $R_f = 0.40$  (MeOH/ $CH_2Cl_2$  1/20); mp 194-195 °C;  $[\alpha]_D^{26} -14.3^\circ$  (c 0.9,  $CHCl_3$ ); IR (nujol) 3294, 3093, 2924, 2858, 1640, 1557, 1458, 1382, 1279, 1215, 1165, 814, 697, 612  $cm^{-1}$ ;  $^1H$  NMR ( $CDCl_3$ )  $\delta$  2.02 (s, C(O)CH<sub>3</sub>), 3.39 (s, OCH<sub>3</sub>), 3.48 (dd,  $J = 7.4, 9.2$  Hz,

CHH'OCH<sub>3</sub>), 3.81 (dd, *J* = 4.0, 9.2 Hz, CHH'OCH<sub>3</sub>), 4.45–4.55 (m, CH<sub>2</sub>N), 4.58–4.63 (m, CH), 6.56 (d, *J* = 6.4 Hz, NHCH), 6.98–7.01 (m, NHCH<sub>2</sub>), 7.27 (d, *J* = 8.0 Hz, 2 ArH), 7.33 (d, *J* = 8.0 Hz, 2 ArH), 7.49–7.58 (m, 4 ArH), addition of excess (*R*)-(-)-mandelic acid to a CDCl<sub>3</sub> solution of (*R*)-**12** gave only one signal for the acetyl methyl and one signal for the ether methyl protons; <sup>13</sup>C NMR (DMSO-*d*<sub>6</sub>) δ 22.5 (C(O)CH<sub>3</sub>), 41.7 (NCH<sub>2</sub>), 52.7 (OCH<sub>2</sub>CH), 58.2 (OCH<sub>3</sub>), 72.1 (OCH<sub>2</sub>CH), 120.1 (q, *J* = 254.9 Hz, OCF<sub>3</sub>), 121.4, 126.6, 127.7, 128.4, 137.1, 139.1, 139.3, 147.7 (ArC), 169.4, 169.8 (2 C(O)); LRMS (ESI<sup>+</sup>) 433.1 [M + Na]<sup>+</sup> (calcd for C<sub>20</sub>H<sub>21</sub>F<sub>3</sub>N<sub>2</sub>O<sub>4</sub>Na<sup>+</sup> 433.1); Anal. Calcd. for C<sub>20</sub>H<sub>21</sub>F<sub>3</sub>N<sub>2</sub>O<sub>4</sub>: C, 58.53; H, 5.16; F, 13.89; N, 6.83. Found: C, 58.50; H, 5.27; F, 13.91; N, 6.82.

#### **Preparation of (*R*)-*N*-(3''-Acetylamino-biphenyl-4'-yl)methyl 2-Acetamido-3-**

**methoxypropionamide ((*R*)-**13**).** Using Method F, (*R*)-**65** (1.80 g, 4.1 mmol) and 4 M HCl (3.1 mL, 12.4 mmol), followed by Et<sub>3</sub>N (1.24 g, 12.2 mmol) and AcCl (0.38 g, 4.9 mmol) gave the desired product (*R*)-**13** (1.05 g, 71%) as a white powder: *R*<sub>f</sub> = 0.20 (CH<sub>2</sub>Cl<sub>2</sub>/CH<sub>3</sub>OH 19/1); mp 150–151 °C; [α]<sup>24.5</sup><sub>D</sub> +11.1 ° (c 1.0, CH<sub>3</sub>OH); <sup>1</sup>H NMR (CDCl<sub>3</sub>/CD<sub>3</sub>OD) δ 2.04 (s, CH<sub>3</sub>C(O)), 2.16 (s, CH<sub>3</sub>C(O)), 3.47 (s, OCH<sub>3</sub>), 3.52–3.57 (m, CHH'OCH<sub>3</sub>), 3.68–3.73 (m, CHH'OCH<sub>3</sub>), 4.40–4.52 (m, CH<sub>2</sub>N), 4.54–4.60 (m, CH), 7.29–7.40 (m, 4 ArH), 7.50–7.56 (m, 3 ArH), 7.76 (s, ArH); <sup>13</sup>C NMR (CDCl<sub>3</sub>/CD<sub>3</sub>OD) δ 22.8, 23.9 (2 CH<sub>3</sub>CO), 43.1 (NCH<sub>2</sub>), 53.1 (CH), 59.1 (OCH<sub>3</sub>), 72.0 (OCH<sub>2</sub>), 118.6, 119.0, 122.8, 127.4, 127.9, 129.3, 137.1, 138.8, 140.3, 141.5, (10 ArC), 170.4, 171.5 (2 C(O)), one carbonyl resonance was not detected and believed to be overlapped with an adjacent peak; LRMS (ESI<sup>+</sup>) 384.2 [M + H]<sup>+</sup> (calcd for C<sub>21</sub>H<sub>26</sub>N<sub>3</sub>O<sub>3</sub><sup>+</sup> 384.2); HRMS (ESI<sup>+</sup>) 384.1924 [M + H]<sup>+</sup> (calcd for C<sub>21</sub>H<sub>26</sub>N<sub>3</sub>O<sub>3</sub><sup>+</sup> 384.1923).

**Preparation of (*R*)-*N*-(3''-Hydroxymethylbiphenyl-4'-yl)methyl 2-Acetamido-3-**

**methoxypropionamide ((*R*)-14).** To a solution of (*R*)-73 (0.65 g, 1.6 mmol) in CH<sub>2</sub>Cl<sub>2</sub> (16 mL) was added 4 M HCl in dioxane (1.5 mL, 6.0 mmol) and stirred at room temperature (4 h). The reaction mixture was evaporated in vacuo and recrystallized (CH<sub>3</sub>OH/EtOAc/hexanes) to give the desired product (*R*)-14 (0.51 g, 90%) as a white solid: *R*<sub>f</sub> = 0.48 (CH<sub>2</sub>Cl<sub>2</sub>/CH<sub>3</sub>OH 9/1); mp 152-153 °C; [α]<sup>22.5</sup><sub>D</sub> +12.7 ° (c 1.0, CH<sub>3</sub>OH); <sup>1</sup>H NMR (CDCl<sub>3</sub>/CD<sub>3</sub>OD) δ 2.00 (s, CH<sub>3</sub>C(O)), 3.34 (s, OCH<sub>3</sub>), 3.45-3.49 (m, CHH'OCH<sub>3</sub>), 3.67-3.72 (m, CHH'OCH<sub>3</sub>), 4.42-4.46 (m, CH<sub>2</sub>N), 4.51-4.55 (m, CH), 4.69 (s, CH<sub>2</sub>OH), 7.27-7.31 (m, 3 ArH), 7.35-7.41 (m, ArH), 7.44-7.46 (m, ArH), 7.50-7.54 (m, 3 ArH); <sup>13</sup>C NMR (CDCl<sub>3</sub>/CD<sub>3</sub>OD) δ 23.1 (CH<sub>3</sub>C(O)), 43.3 (NCH<sub>2</sub>), 52.9 (CH), 59.3 (OCH<sub>3</sub>), 65.0 (ArCH<sub>2</sub>OH), 72.0 (CH<sub>3</sub>OCH<sub>2</sub>), 125.7, 126.1, 126.3, 127.5, 128.0, 129.1, 137.1, 140.4, 141.0, 141.8 (10 ArC), 170.3, 171.2 (2 C(O)NH); LRMS (ESI<sup>+</sup>) 357.1 [M + H]<sup>+</sup> (calcd for C<sub>20</sub>H<sub>24</sub>N<sub>2</sub>O<sub>4</sub>H<sup>+</sup> 357.2); Anal. Calcd. for C<sub>20</sub>H<sub>24</sub>N<sub>2</sub>O<sub>4</sub>: C, 67.40; H, 6.79; N, 7.86. Found: C, 67.32; H, 6.98; N, 7.74.

**Preparation of (*R*)-*N*-(3''-Carboxybiphenyl-4'-yl)methyl 2-Acetamido-3-methoxypropionamide**

**((*R*)-15).** Using the previous procedure, (*R*)-74 (0.31 g, 0.7 mmol) and 4 M HCl (0.8 mL, 3.2 mmol) gave the desired product (*R*)-15 (0.21 g, 82%) as a white solid: *R*<sub>f</sub> = 0.56 (CH<sub>2</sub>Cl<sub>2</sub>/CH<sub>3</sub>OH 9/1); mp 196-197 °C; [α]<sup>23</sup><sub>D</sub> +9.6 ° (c 1.0, CH<sub>3</sub>OH); <sup>1</sup>H NMR (CDCl<sub>3</sub>/CD<sub>3</sub>OD) δ 1.99 (s, CH<sub>3</sub>C(O)), 3.46-3.50 (m, CHH'OCH<sub>3</sub>), 3.63-3.66 (m, CHH'OCH<sub>3</sub>), 4.39 (dd, *J* = 5.8, 14.0 Hz, CHH'N), 4.46 (dd, *J* = 5.8, 14.0 Hz, CHH'N), 4.50-4.55 (br t, CH), 6.78-6.84 (m, N(H)CH<sub>2</sub>), 7.16-7.21 (m, ArH), 7.28-7.56 (m, N(H)C(O), 7 ArH), the methoxy proton resonance was not detected and believed to be overlapped with the adjacent peak near δ 3.40; <sup>13</sup>C NMR (CDCl<sub>3</sub>/CD<sub>3</sub>OD) δ 22.8 (CH<sub>3</sub>C(O)), 43.1 (NCH<sub>2</sub>), 52.9 (CH), 59.1 (OCH<sub>3</sub>), 72.1 (OCH<sub>2</sub>), 127.4, 128.0, 128.4, 128.8, 128.9, 131.0, 131.5, 137.5, 139.4, 141.0 (10 ArC), 168.9 (ArC(O)), 170.4, 171.5 (2 C(O)NH); LRMS (ESI<sup>+</sup>) 371.2 [M +



$\text{H}]^+$  (calcd for  $\text{C}_{20}\text{H}_{22}\text{N}_2\text{O}_5\text{H}^+$  371.2); HRMS (ESI<sup>+</sup>) 371.1607 [M + H]<sup>+</sup> (calcd for  $\text{C}_{20}\text{H}_{22}\text{N}_2\text{O}_5\text{H}^+$  371.1607); Anal. Calcd. for  $\text{C}_{20}\text{H}_{22}\text{N}_2\text{O}_5 \cdot 0.13\text{H}_2\text{O}$ : C, 64.45; H, 6.02; N, 7.52. Found: C, 64.06; H, 6.09; N, 7.35.

**Preparation of (*R*)-*N*-(3''-Aminobiphenyl-4'-yl)methyl 2-Acetamido-3-methoxypropionamide Hydrochloride ((*R*)-**16**).** Using the procedure for (*R*)-**14**, (*R*)-**75** (1.18 g, 3.59 mmol) and 4 M HCl (2.7 mL, 10.80 mmol) gave the desired product (*R*)-**16** (0.91 g, 90%) as a yellow solid:  $R_f = 0.00$  (EtOAc/hexanes 1/1); mp 99-100 °C;  $[\alpha]_D^{23.5} +10.4^\circ$  ( $c$  1.0,  $\text{CH}_3\text{OH}$ ); <sup>1</sup>H NMR ( $\text{CDCl}_3/\text{CD}_3\text{OD}$ )  $\delta$  1.99 (s,  $\text{CH}_3\text{C}(\text{O})$ ), 3.36 (s,  $\text{OCH}_3$ ), 3.50 (dd,  $J = 4.0, 9.2$  Hz,  $\text{CHH}'\text{OCH}_3$ ), 3.78 (dd,  $J = 7.2, 9.2$  Hz,  $\text{CHH}'\text{OCH}_3$ ), 4.43 (dd,  $J = 5.8, 15.0$  Hz,  $\text{CHH}'\text{N}$ ), 4.48 (dd,  $J = 5.8, 15.0$  Hz,  $\text{CHH}'\text{N}$ ), 4.59-4.64 (m,  $\text{CH}$ ), 6.63-6.67 (m,  $\text{N}(\text{H})\text{CH}$ , 1  $\text{ArH}$ ), 6.85 (m, 1  $\text{ArH}$ ), 6.93-6.96 (m, 1  $\text{ArH}$ ), 6.99-7.05 (br t,  $\text{N}(\text{H})\text{CH}_2$ ), 7.20 (t,  $J = 7.8$  Hz, 1  $\text{ArH}$ ), 7.26 (d,  $J = 6.0$  Hz, 2  $\text{ArH}$ ), 7.49 (dd,  $J = 1.6, 6.4$  Hz, 2  $\text{ArH}$ ); <sup>13</sup>C NMR ( $\text{CD}_3\text{OD}$ )  $\delta$  22.6 ( $\text{CH}_3\text{C}(\text{O})$ ), 42.8 ( $\text{NCH}_2$ ), 52.8 ( $\text{CH}$ ), 58.3 ( $\text{OCH}_3$ ), 72.1 ( $\text{OCH}_2$ ), 121.2, 122.0, 126.0, 126.6, 127.8, 130.4, 132.8, 137.2, 139.5, 141.4, (10  $\text{ArC}$ ), 169.6, 169.9 (2  $\text{C}(\text{O})\text{NH}$ ); LRMS (ESI<sup>+</sup>) 364.2 [M + Na - HCl]<sup>+</sup> (calcd for  $\text{C}_{19}\text{H}_{23}\text{NaN}_3\text{O}_3^+$  364.2); HRMS (ESI<sup>+</sup>) 342.1817 [M - Cl]<sup>+</sup> (calcd for  $\text{C}_{19}\text{H}_{24}\text{N}_3\text{O}_3$  342.1817).

## References

1. Park, K.D.; Yang, X.-F.; Lee, H.; Dustrude, E.T.; Wang, Y.; Khanna, R.; Kohn, H. Discovery of lacosamide affinity bait agents that exhibit potent voltage-gated sodium channel blocking properties. *ACS Chem. Neurosci.*, **2013**, *4*, 463–474.
2. Salome, C., Salome-Grosjean, E., Park, K. D., Morieux, P., Swendiman, R., DeMarco, E., Stables, J. P., and Kohn, H. Synthesis and anticonvulsant activities of (*R*)-*N*-(4'-

substituted)benzyl 2-acetamido-3-methoxypropionamides. *J. Med. Chem.* **2010**, *53*,  
1288–1305.

**(R)-N-(4''-Fluorobiphenyl-4'-yl)methyl 2-Acetamido-3-methoxypropionamide ((R)-4)**

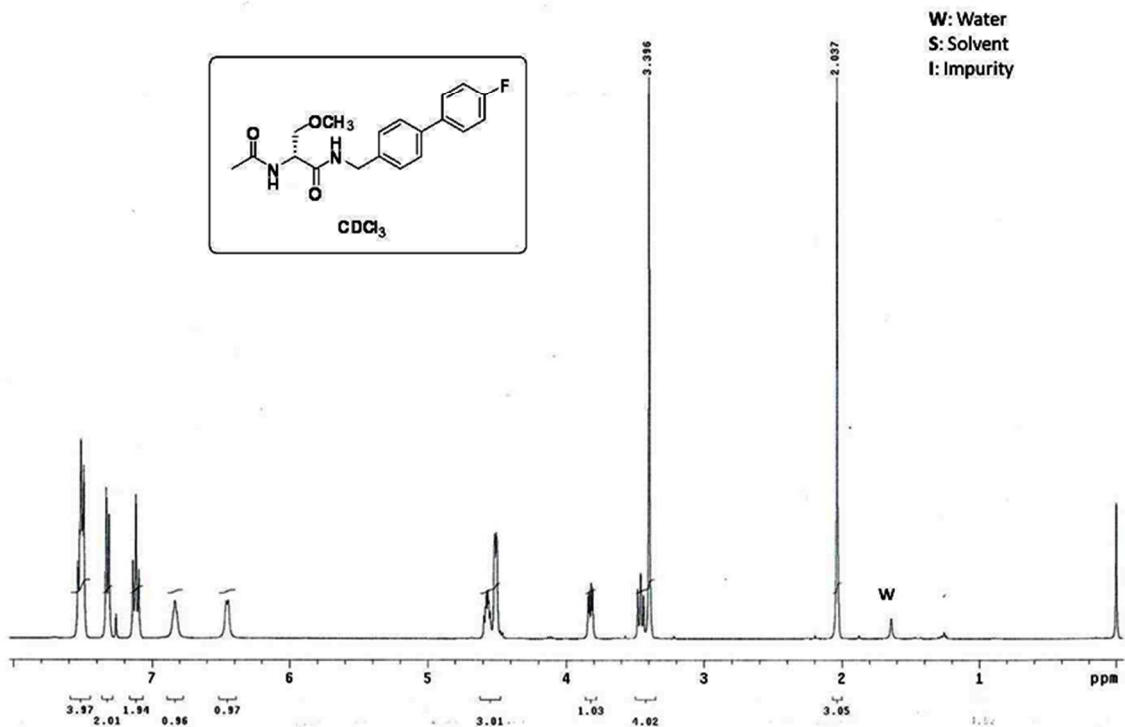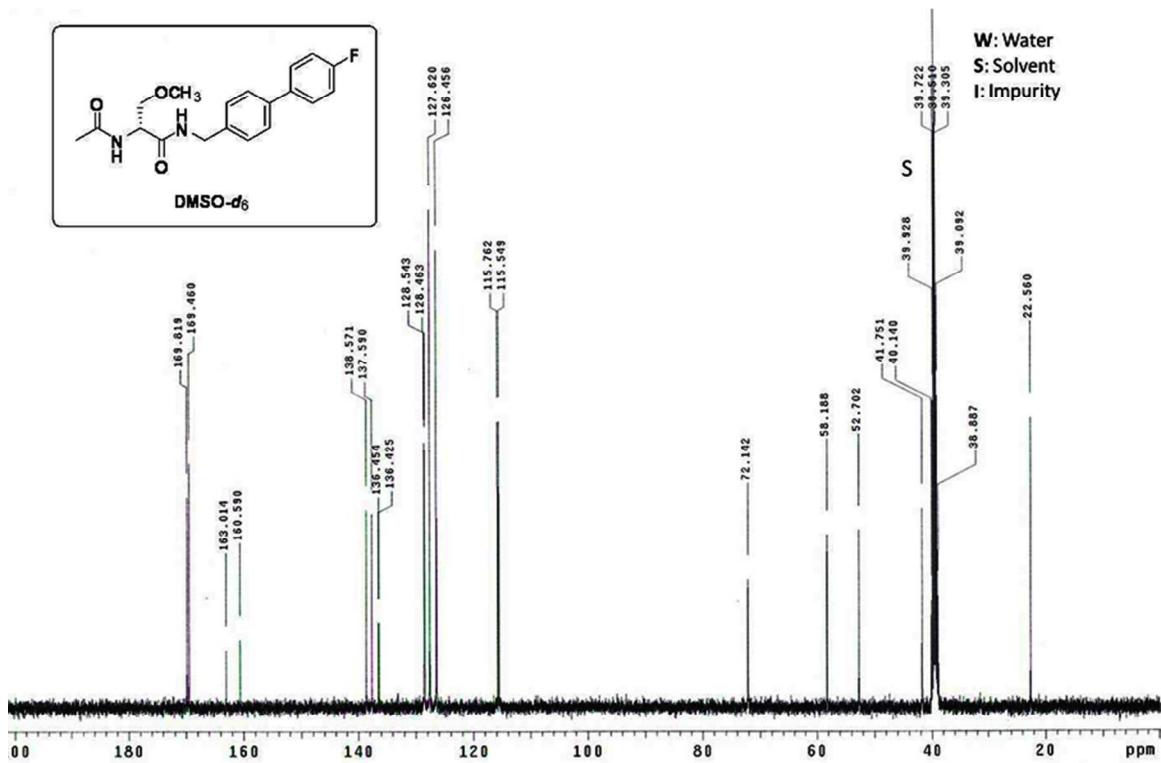

**(R)-N-(3''-Chlorobiphenyl-4'-yl)methyl 2-Acetamido-3-methoxypropionamide ((R)-5)**

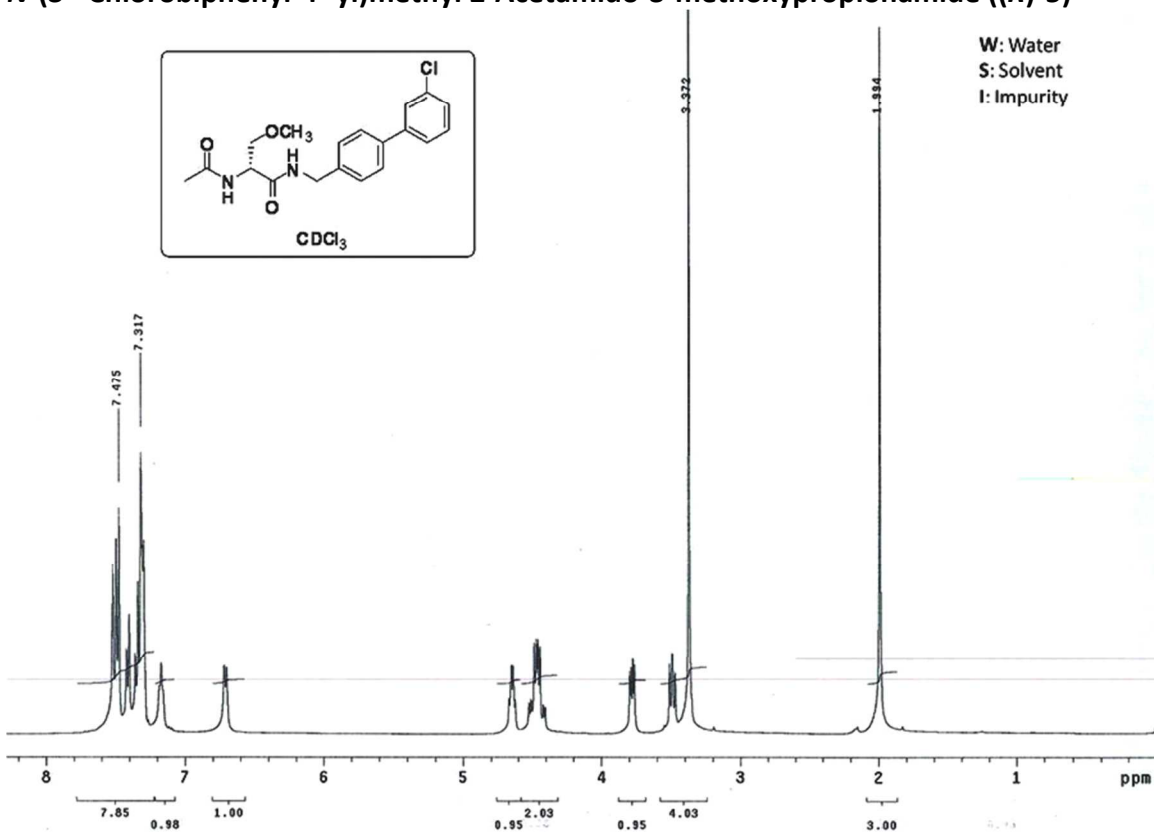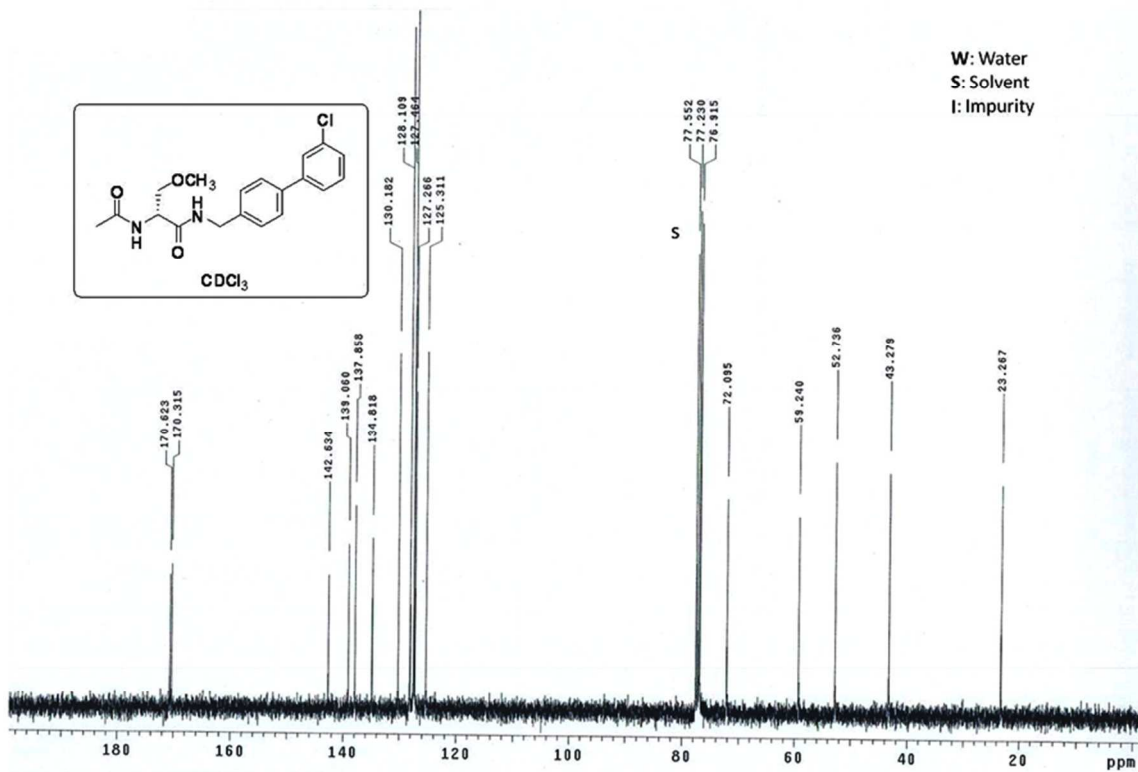

**(R)-N-(4''-Chlorobiphenyl-4'-yl)methyl 2-Acetamido-3-methoxypropionamide ((R)-6)**

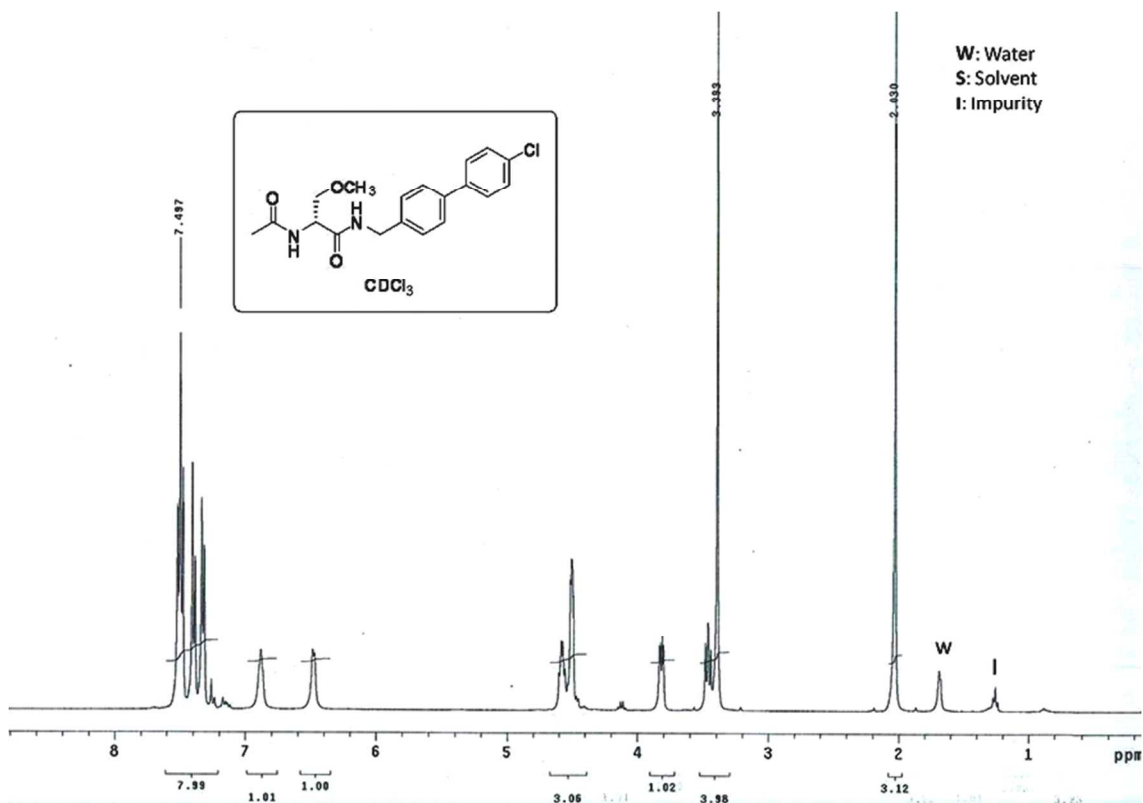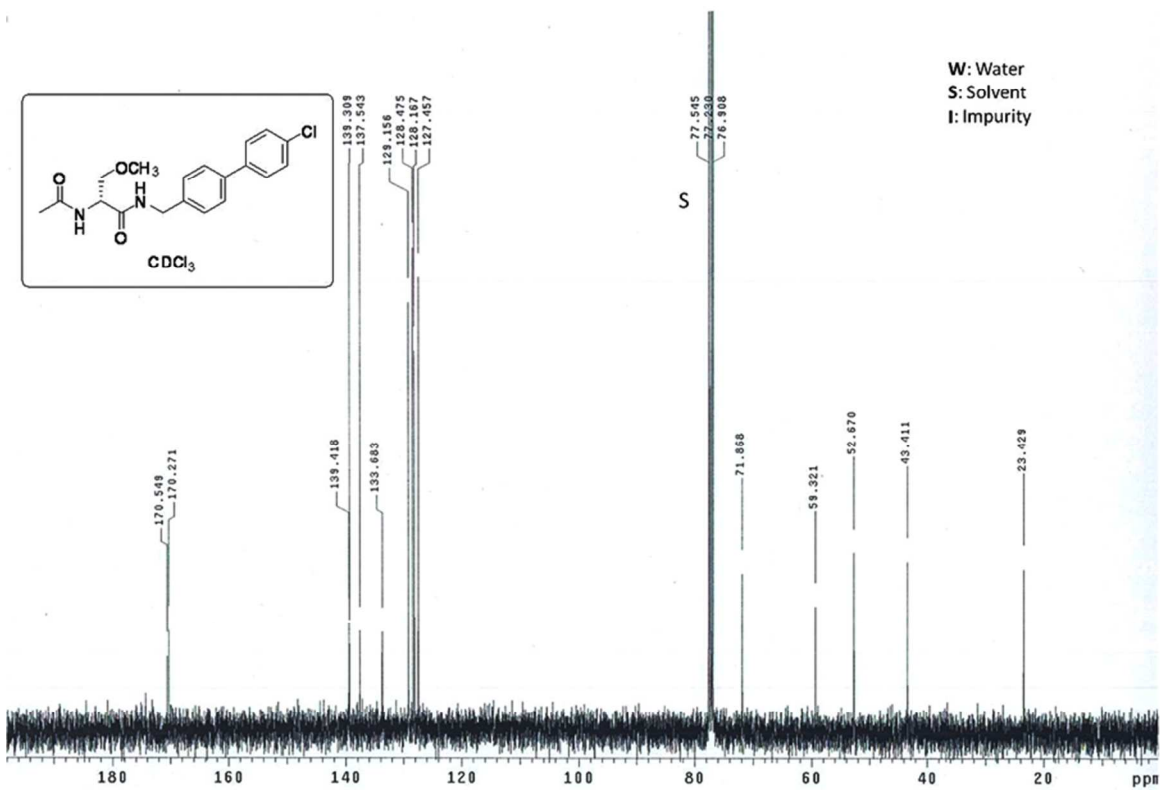

**(R)-N-(3''-Bromo-4-biphenylmethyl) 2-Acetamido-3-methoxypropionamide ((R)-7)**

|                        |                                                                                  |                      |          |                       |              |                        |            |
|------------------------|----------------------------------------------------------------------------------|----------------------|----------|-----------------------|--------------|------------------------|------------|
| Acquisition Time (sec) | 2.5559                                                                           | Comment              | RT-2-8   | Date                  | May 9 2013   | Date Stamp             | May 9 2013 |
| File Name              | C:\Documents and Settings\rtorreg\My Documents\NMR Proton\2_8_PROTON_001.fid\fid |                      |          | Frequency (MHz)       | 399.71       |                        |            |
| Nucleus                | <sup>1</sup> H                                                                   | Number of Transients | 8        | Original Points Count | 16384        | Points Count           | 16384      |
| Pulse Sequence         | s2pul                                                                            | Receiver Gain        | 30.00    | Solvent               | CHLOROFORM-d |                        |            |
| Spectrum Offset (Hz)   | 2403.7048                                                                        | Spectrum Type        | STANDARD | Sweep Width (Hz)      | 6410.26      | Temperature (degree C) | 26.000     |

RT-2-8-proton.esp

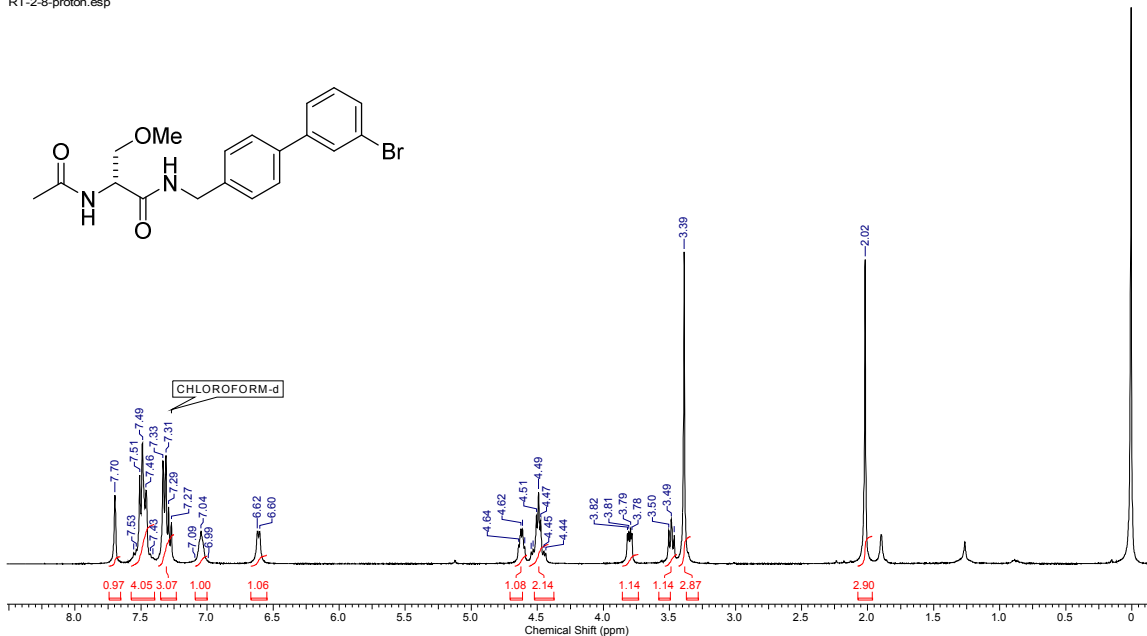

|                        |                                                              |                      |          |                       |              |                        |            |
|------------------------|--------------------------------------------------------------|----------------------|----------|-----------------------|--------------|------------------------|------------|
| Acquisition Time (sec) | 1.3107                                                       | Comment              | RT-2-8   | Date                  | May 9 2013   | Date Stamp             | May 9 2013 |
| File Name              | C:\Users\Robert\Documents\NMR Carbon\2_8_CARBOIN_001.fid\fid |                      |          | Frequency (MHz)       | 100.52       |                        |            |
| Nucleus                | <sup>13</sup> C                                              | Number of Transients | 1000     | Original Points Count | 32768        | Points Count           | 32768      |
| Pulse Sequence         | s2pul                                                        | Receiver Gain        | 30.00    | Solvent               | CHLOROFORM-d |                        |            |
| Spectrum Offset (Hz)   | 11053.0596                                                   | Spectrum Type        | STANDARD | Sweep Width (Hz)      | 25000.00     | Temperature (degree C) | 26.000     |

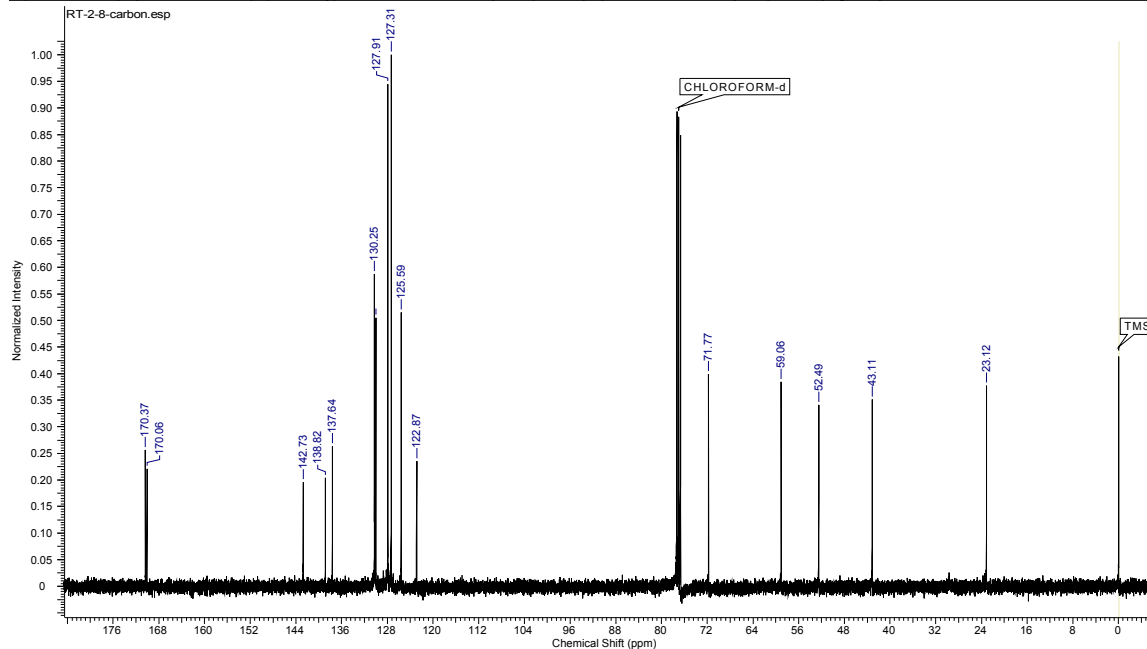

**(R)-N-(3''-Iodo-4-biphenylmethyl) 2-Acetamido-3-methoxypropionamide ((R)-8)**

|                        |                                                                                    |                      |          |                       |              |                        |            |
|------------------------|------------------------------------------------------------------------------------|----------------------|----------|-----------------------|--------------|------------------------|------------|
| Acquisition Time (sec) | 2.5559                                                                             | Comment              | RT-1-153 | Date                  | Apr 1 2013   | Date Stamp             | Apr 1 2013 |
| File Name              | C:\Documents and Settings\rtorreg\My Documents\NMR Proton\1_153_PROTON_001.fid\fid |                      |          | Frequency (MHz)       | 399.71       |                        |            |
| Nucleus                | 1H                                                                                 | Number of Transients | 8        | Original Points Count | 16384        | Points Count           | 16384      |
| Pulse Sequence         | s2pul                                                                              | Receiver Gain        | 42.00    | Solvent               | CHLOROFORM-d |                        |            |
| Spectrum Offset (Hz)   | 2408.4192                                                                          | Spectrum Type        | STANDARD | Sweep Width (Hz)      | 6410.26      | Temperature (degree C) | 26.000     |

RT-1-153-proton.esp

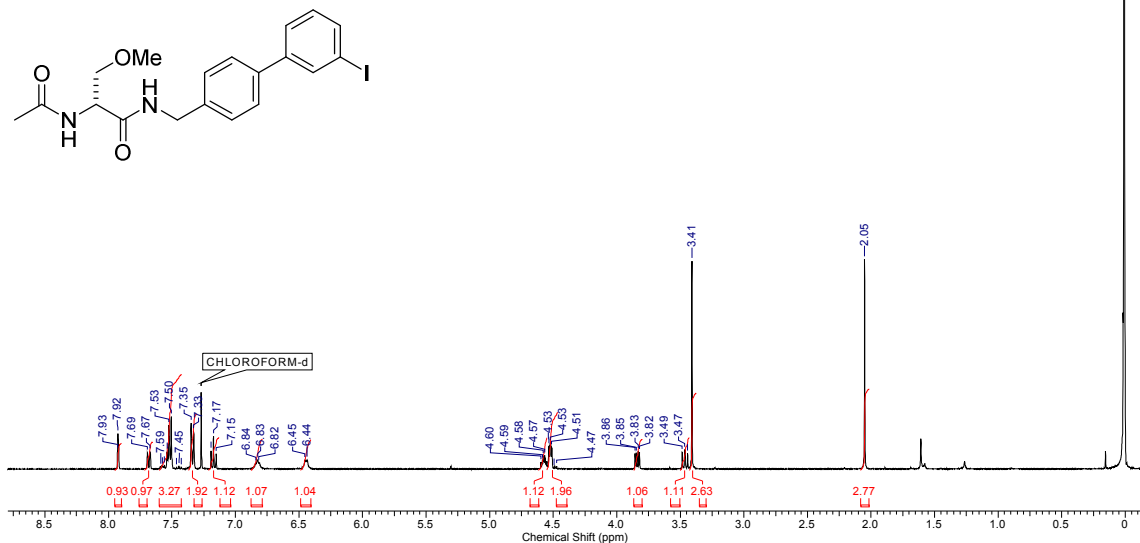

|                        |                                                                                    |                      |          |                       |              |                        |            |
|------------------------|------------------------------------------------------------------------------------|----------------------|----------|-----------------------|--------------|------------------------|------------|
| Acquisition Time (sec) | 1.3107                                                                             | Comment              | RT-1-153 | Date                  | Apr 1 2013   | Date Stamp             | Apr 1 2013 |
| File Name              | C:\Documents and Settings\rtorreg\My Documents\NMR Carbon\1_153_CARBON_001.fid\fid |                      |          | Frequency (MHz)       | 100.52       |                        |            |
| Nucleus                | 13C                                                                                | Number of Transients | 2000     | Original Points Count | 32768        | Points Count           | 32768      |
| Pulse Sequence         | s2pul                                                                              | Receiver Gain        | 30.00    | Solvent               | CHLOROFORM-d |                        |            |
| Spectrum Offset (Hz)   | 11058.4512                                                                         | Spectrum Type        | STANDARD | Sweep Width (Hz)      | 25000.00     | Temperature (degree C) | 26.000     |

RT-1-153-carbon.esp

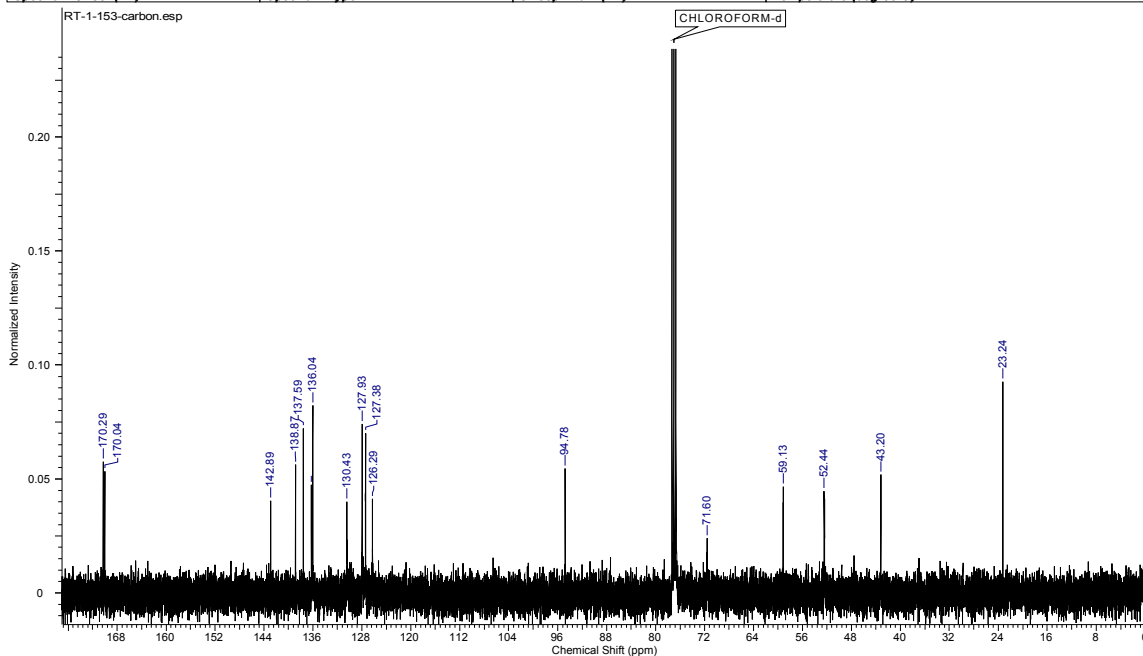

**(R)-N-(3''-Cyanobiphenyl-4'-yl)methyl 2-Acetamido-3-methoxypropionamide ((R)-9)**

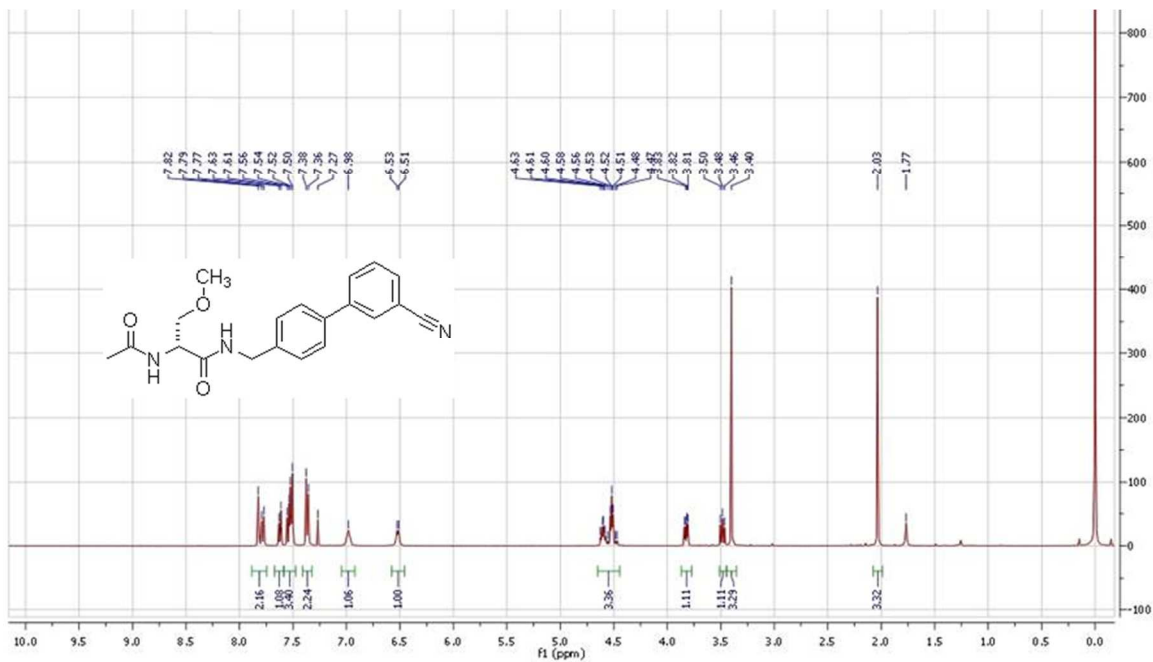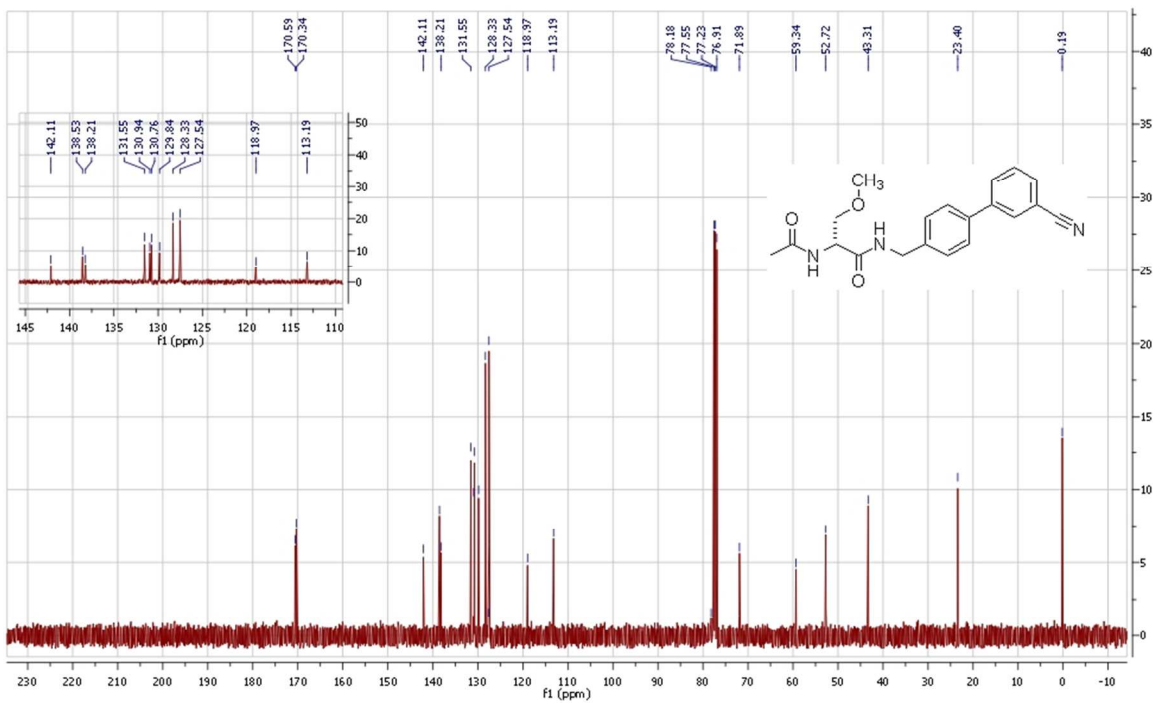



**(R)-N-(3''-Trifluoromethyl)-4-biphenylmethyl 2-Acetamido-3-methoxypropionamide ((R)-10)**

|                        |                                                                                   |                      |             |                        |              |
|------------------------|-----------------------------------------------------------------------------------|----------------------|-------------|------------------------|--------------|
| Acquisition Time (sec) | 2.5559                                                                            | Date                 | Nov 28 2012 | Date Stamp             | Nov 28 2012  |
| File Name              | C:\Documents and Settings\rtorreg\My Documents\NMR Proton\1_19_PROTON_003.fid\fid |                      |             | Frequency (MHz)        | 399.72       |
| Nucleus                | 1H                                                                                | Number of Transients | 16          | Original Points Count  | 16384        |
| Pulse Sequence         | s2pul                                                                             | Receiver Gain        | 30.00       | Solvent                | CHLOROFORM-d |
| Spectrum Offset (Hz)   | 2402.2251                                                                         | Spectrum Type        | STANDARD    | Sweep Width (Hz)       | 6410.26      |
|                        |                                                                                   |                      |             | Temperature (degree C) | 26.000       |

RT-1-19-proton.esp

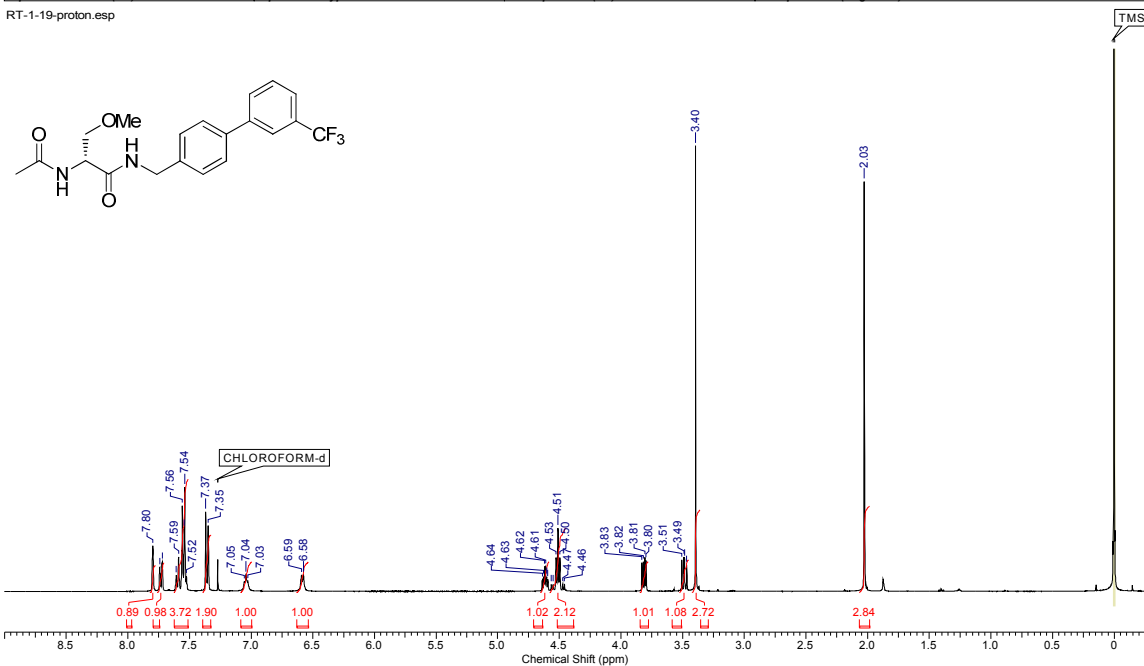

|                        |                                                                                   |                      |             |                        |              |
|------------------------|-----------------------------------------------------------------------------------|----------------------|-------------|------------------------|--------------|
| Acquisition Time (sec) | 1.3107                                                                            | Date                 | Nov 29 2012 | Date Stamp             | Nov 29 2012  |
| File Name              | C:\Documents and Settings\rtorreg\My Documents\NMR Carbon\1_19_CARBON_002.fid\fid |                      |             | Frequency (MHz)        | 100.52       |
| Nucleus                | 13C                                                                               | Number of Transients | 1000        | Original Points Count  | 32768        |
| Pulse Sequence         | s2pul                                                                             | Receiver Gain        | 30.00       | Solvent                | CHLOROFORM-d |
| Spectrum Offset (Hz)   | 11054.0508                                                                        | Spectrum Type        | STANDARD    | Sweep Width (Hz)       | 25000.00     |
|                        |                                                                                   |                      |             | Temperature (degree C) | 26.000       |

RT-1-19-carbon2\_with\_multiplot.esp

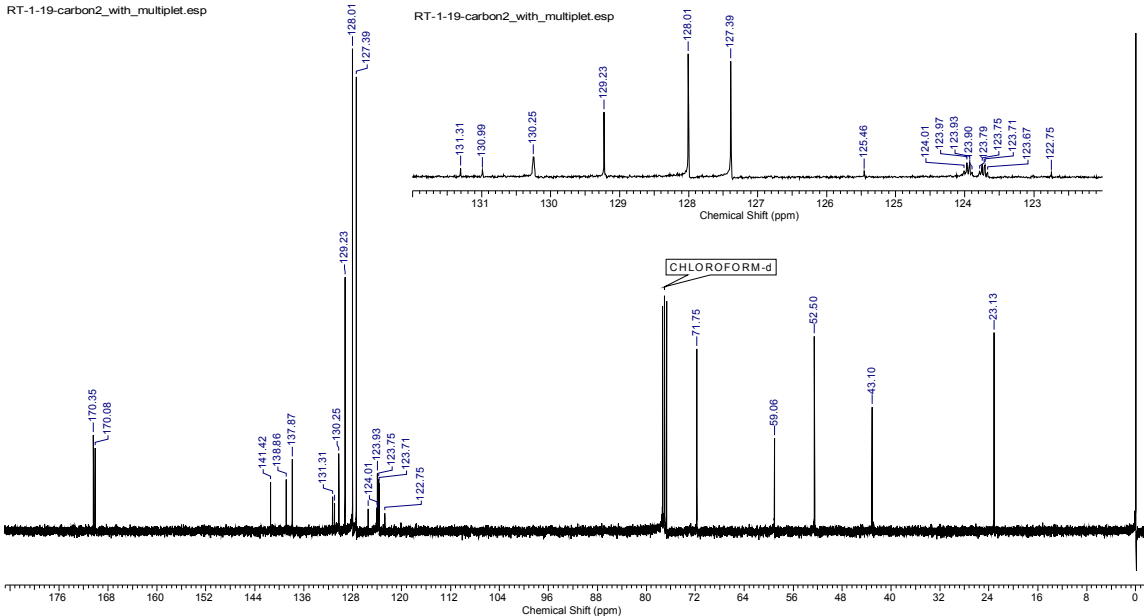

**(R)-N-(3''-Trifluoromethoxybiphenyl-4'-yl)methyl 2-Acetamido-3-methoxypropionamide ((R)-11)**

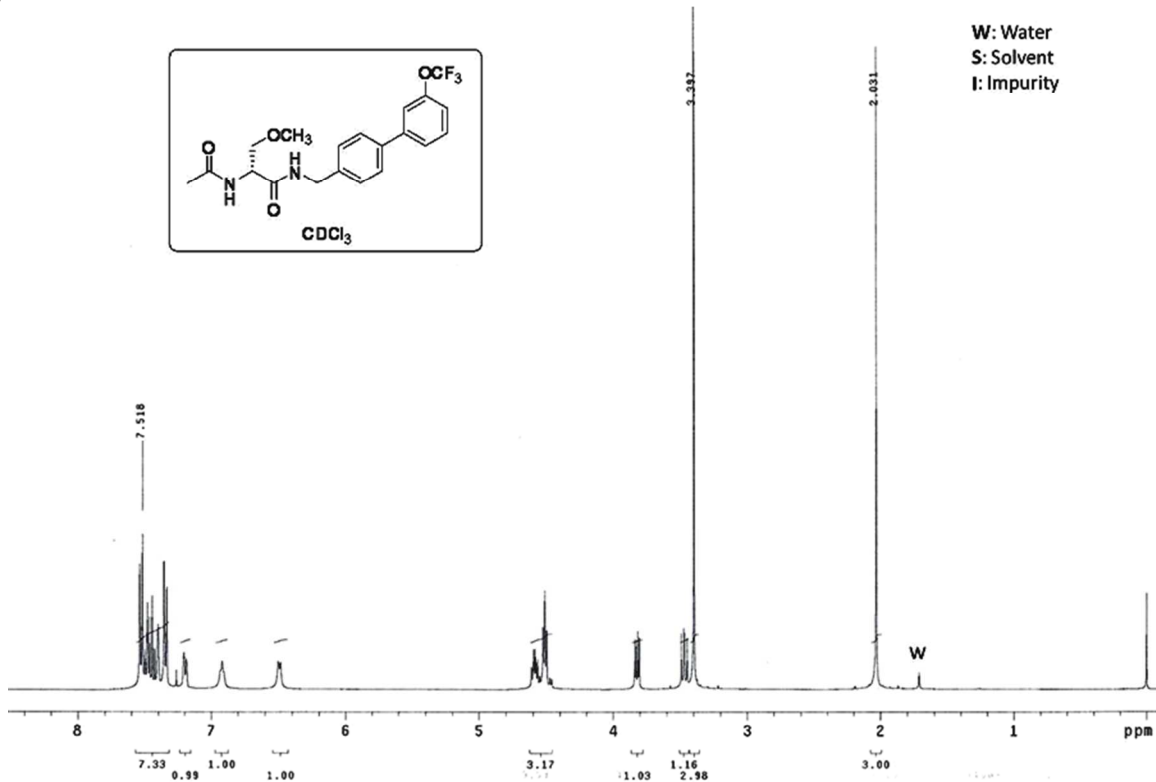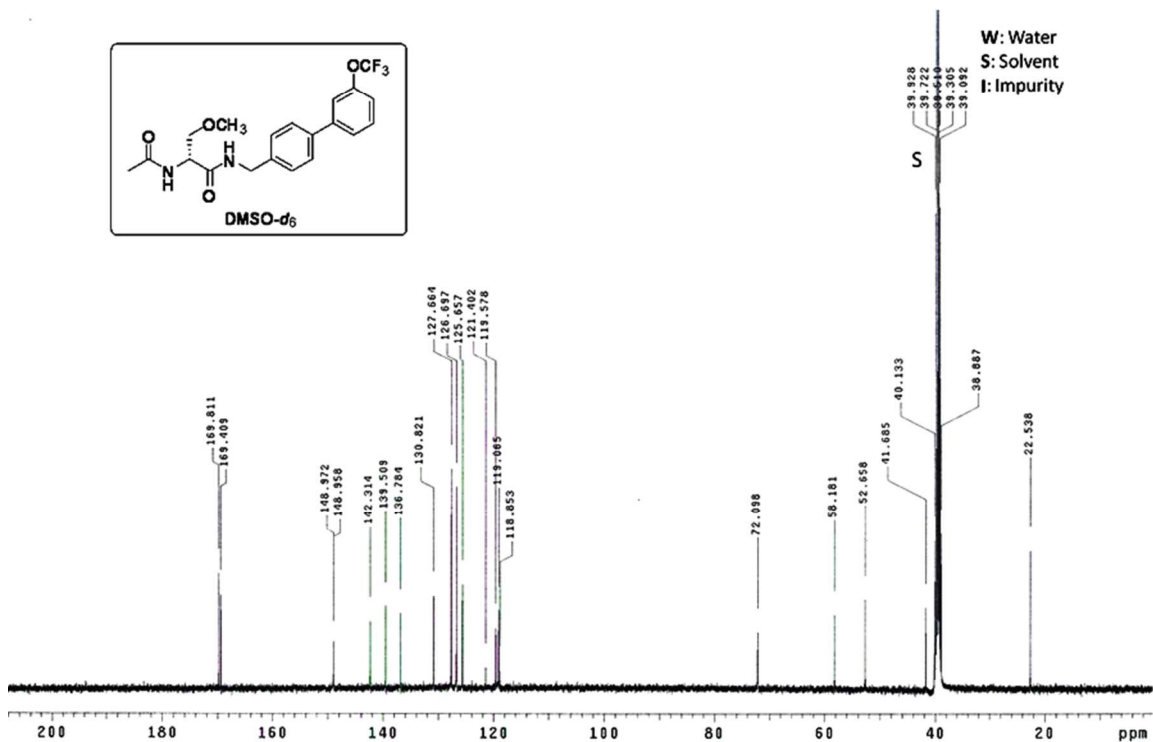

**(R)-N-(4''-Trifluoromethoxybiphenyl-4'-yl)methyl 2-Acetamido-3-methoxypropionamide ((R)-12)**

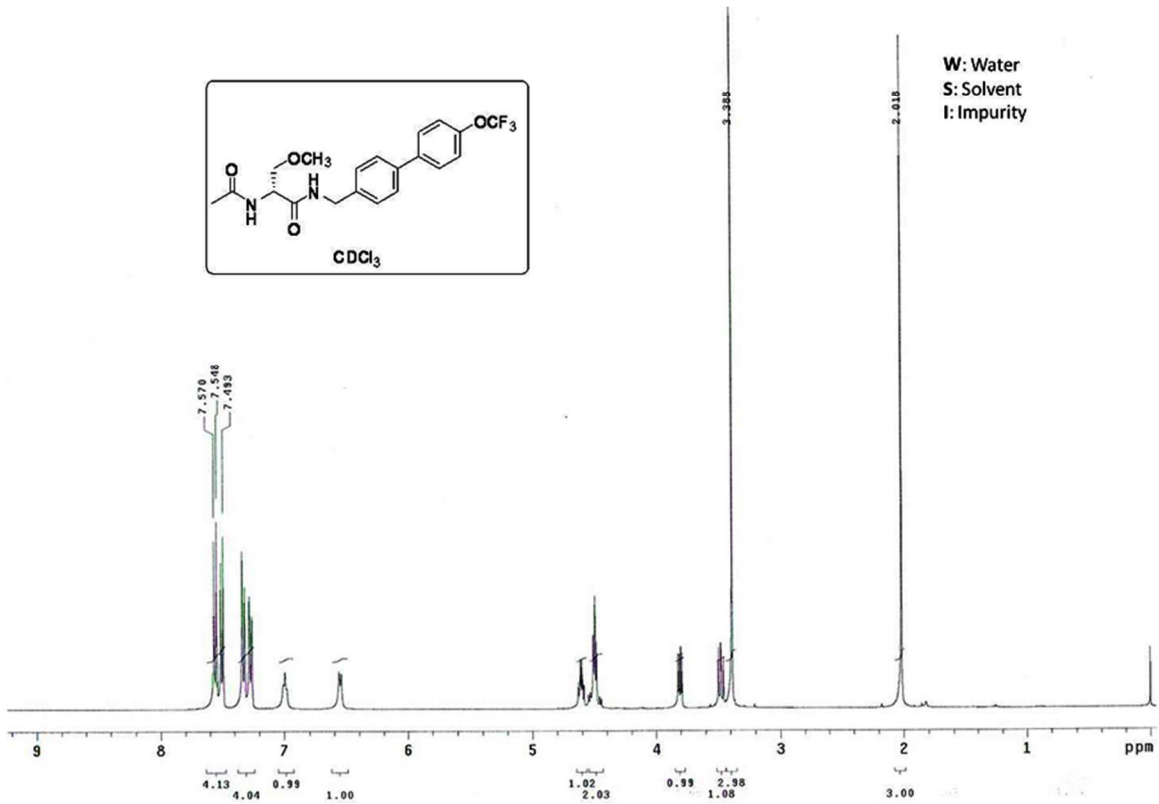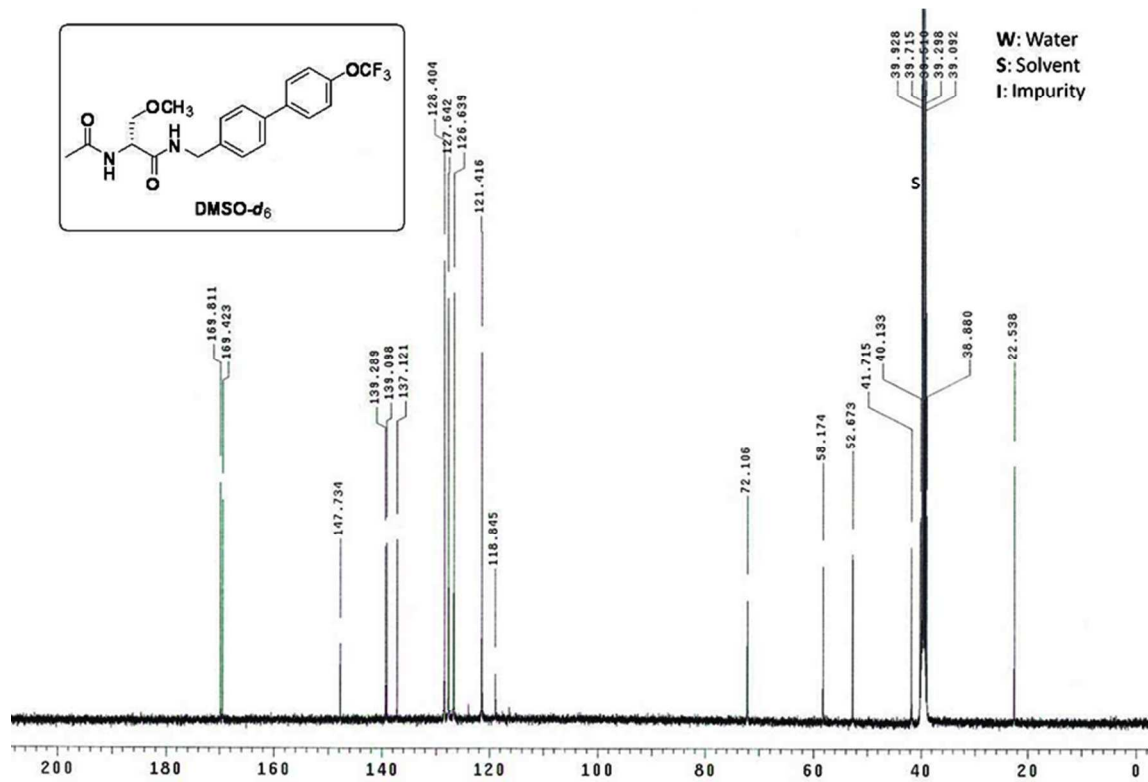

**(R)-N-(3''-Acetylamino-biphenyl-4'-yl)methyl 2-Acetamido-3-methoxypropionamide ((R)-13)**

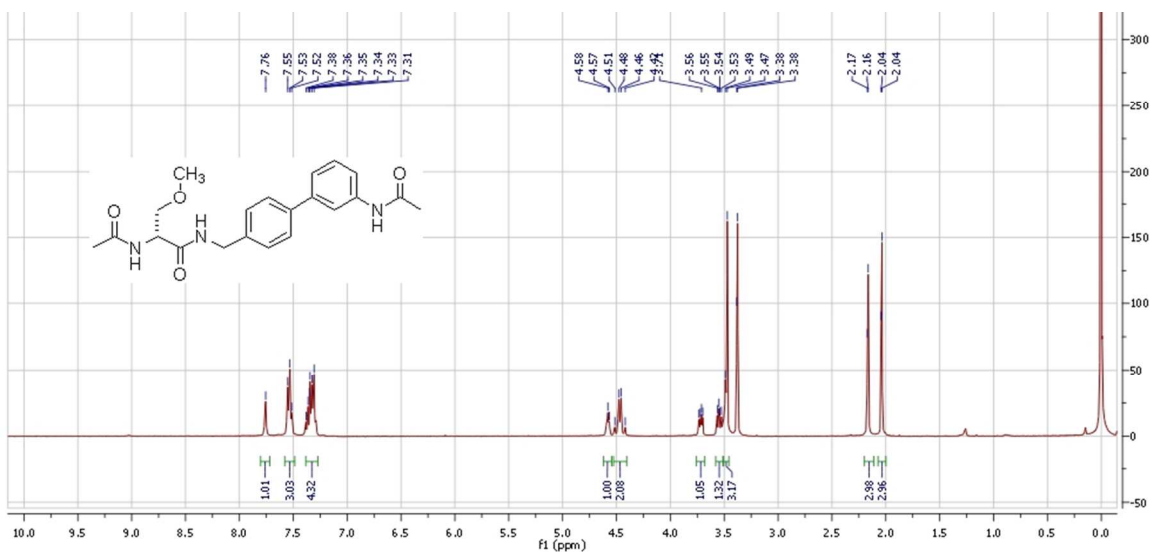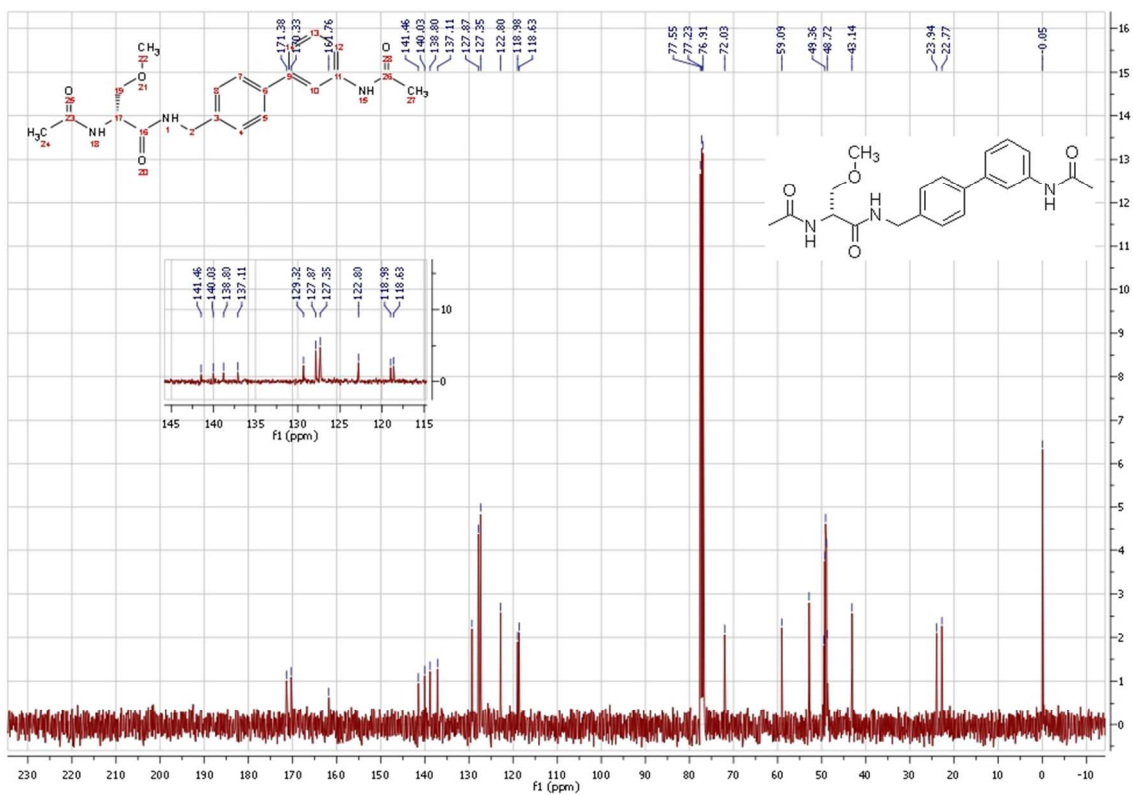

**(R)-N-(3''-Hydroxymethylbiphenyl-4'-yl)methyl 2-Acetamido-3-methoxypropionamide ((R)-14)**

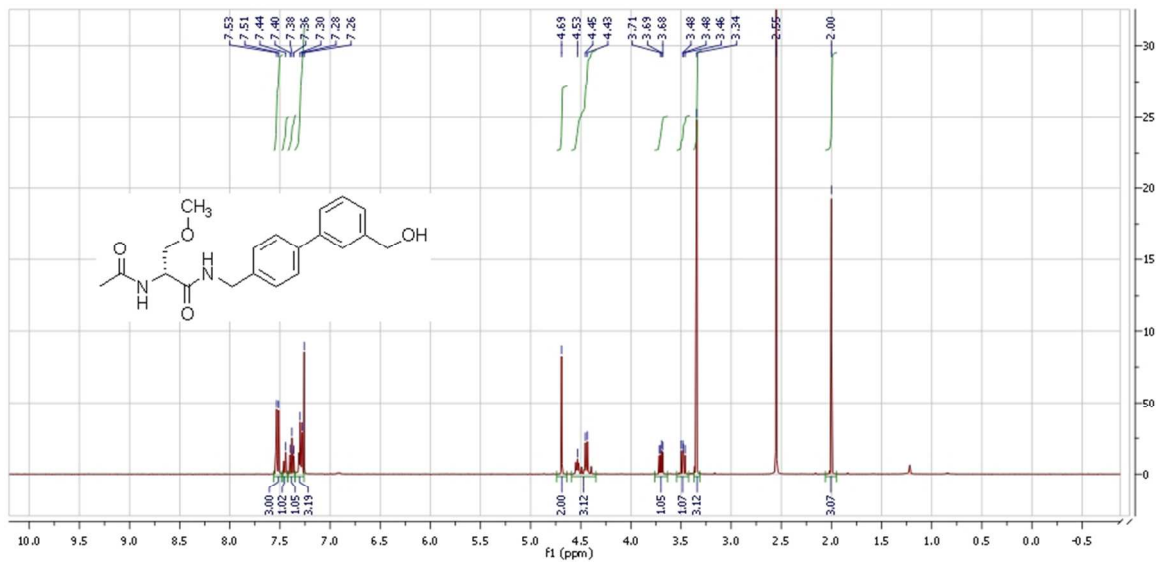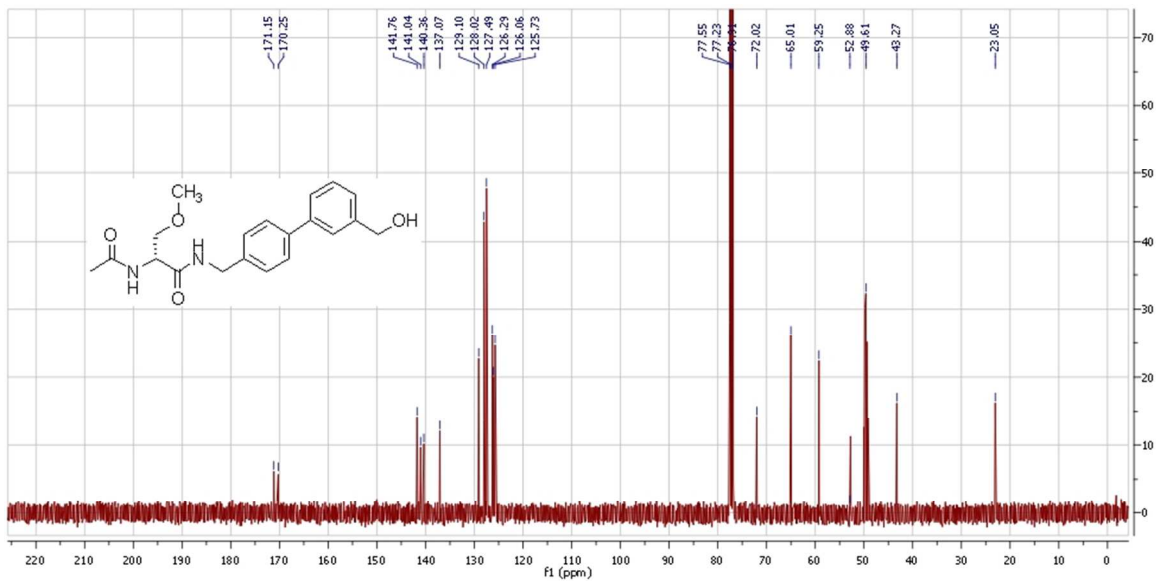

**(R)-N-(3''-Carboxybiphenyl-4'-yl)methyl 2-Acetamido-3-methoxypropionamide ((R)-15)**

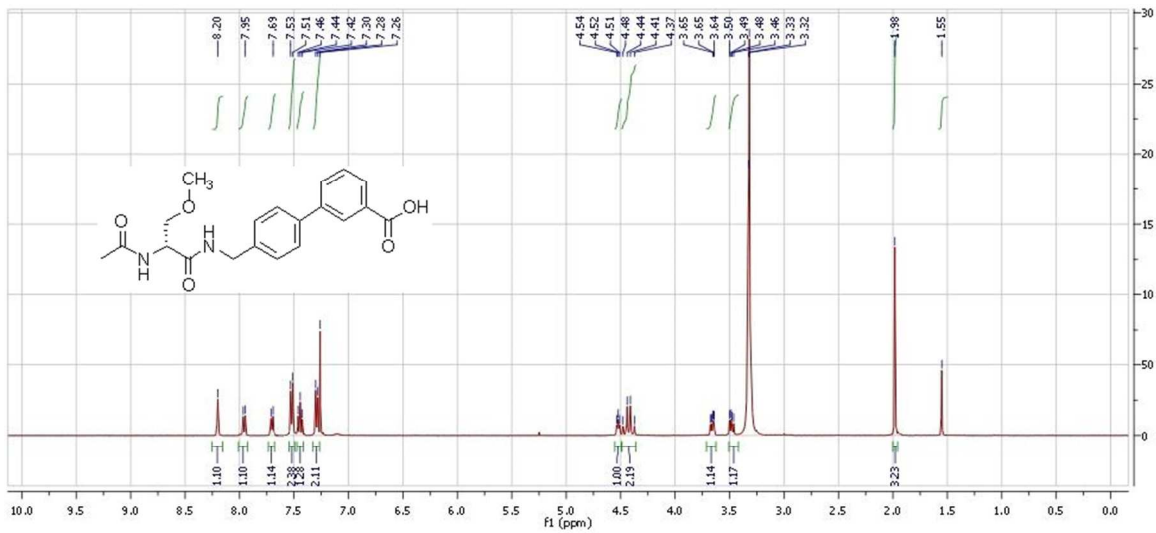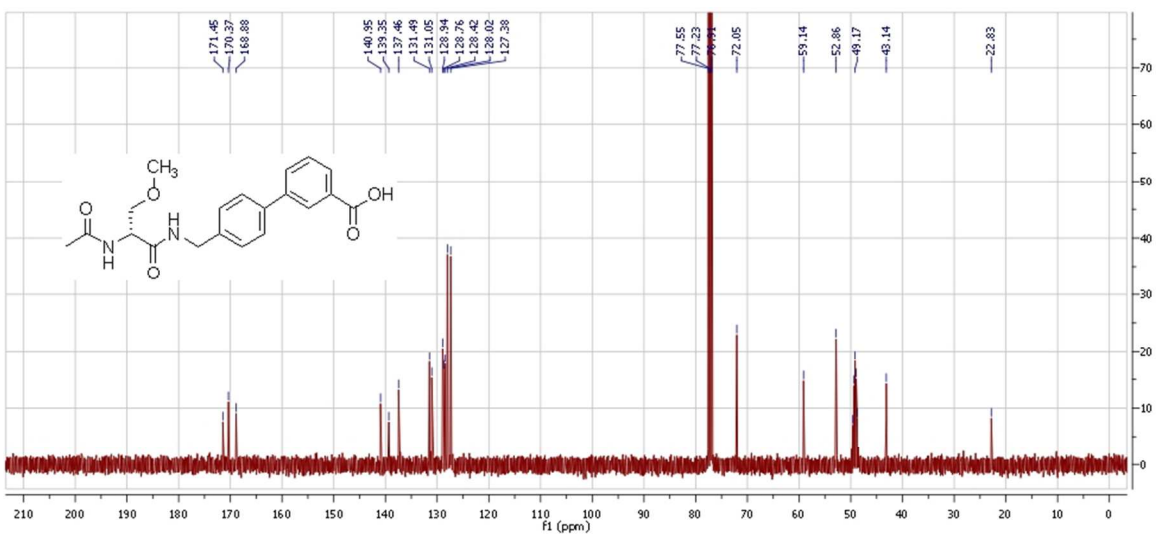

**(R)-N-(3''-Aminobiphenyl-4'-yl)methyl 2-Acetamido-3-methoxypropionamide Hydrochloride ((R)-16)**

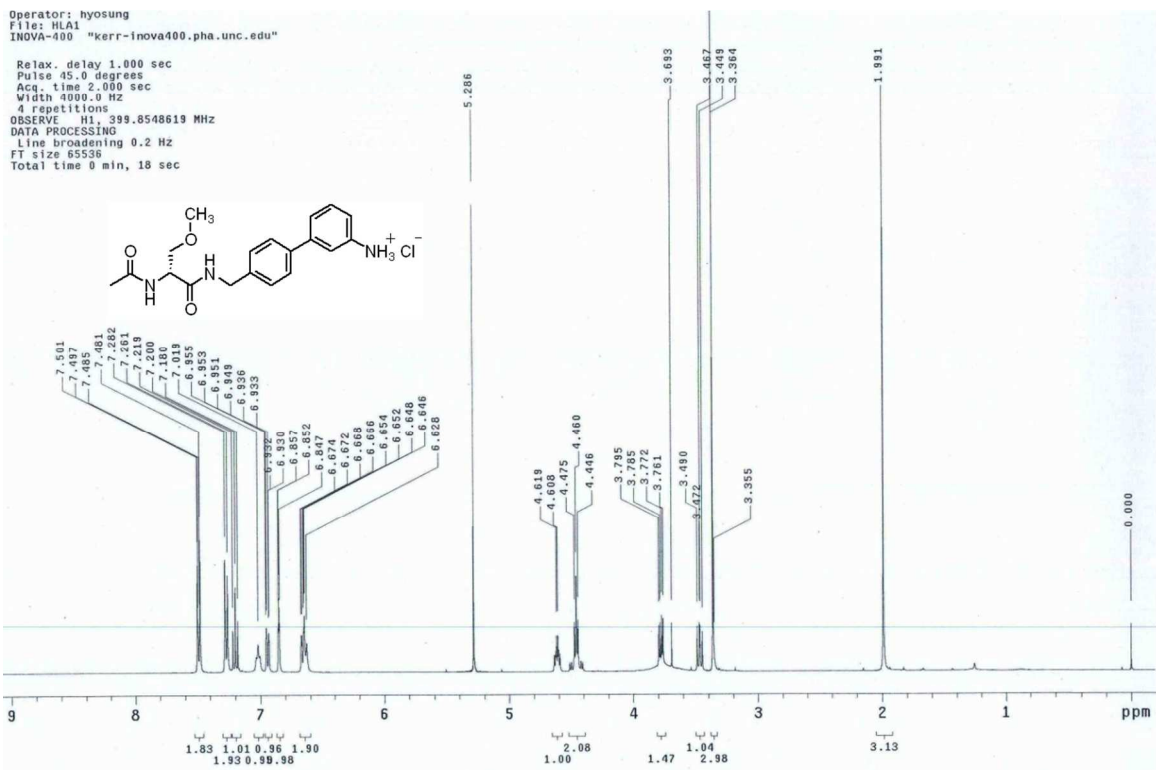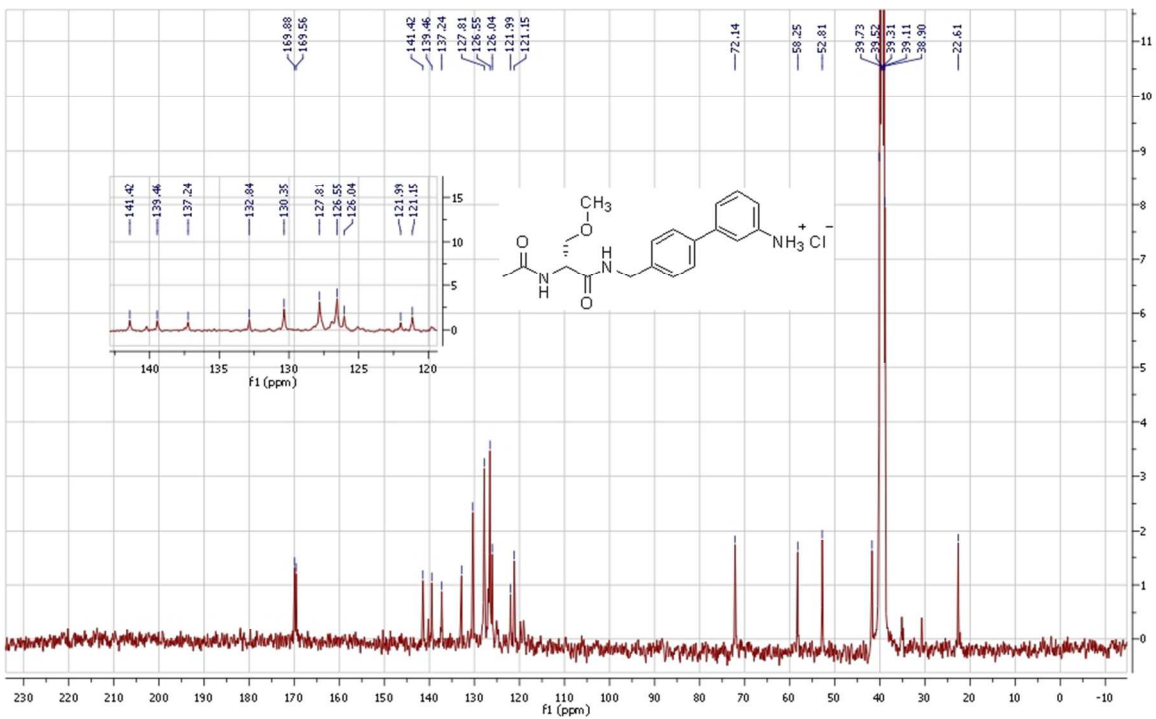

Supplement: jm500707r_si_001.pdf [file jm500707r_si_001.pdf]
